# Supplementary material
Source: publisher figshare collection journal article supplement (https://karger.figshare.com/articles/dataset/_/5120953)

## Supplementary Figure I

Computational simulation of biological interaction of differentially expressed genes in senescent endothelial cells as revealed by PathwayArchitect™. NFKBIA, nuclear factor of kappa light polypeptide gene enhancer in B-cells inhibitor alpha/ I kappa B; SOD2, superoxide dismutase (SOD2); TRAF5, TNF-receptor associated factor 5; TGFB2, transforming growth factor beta 2; VEGF, vascular endothelial growth factor; TNF, tumor necrosis factor alpha. Arrows: -----|, inhibitory effect; -----+ >, enhancing effect; -----, binding effect.

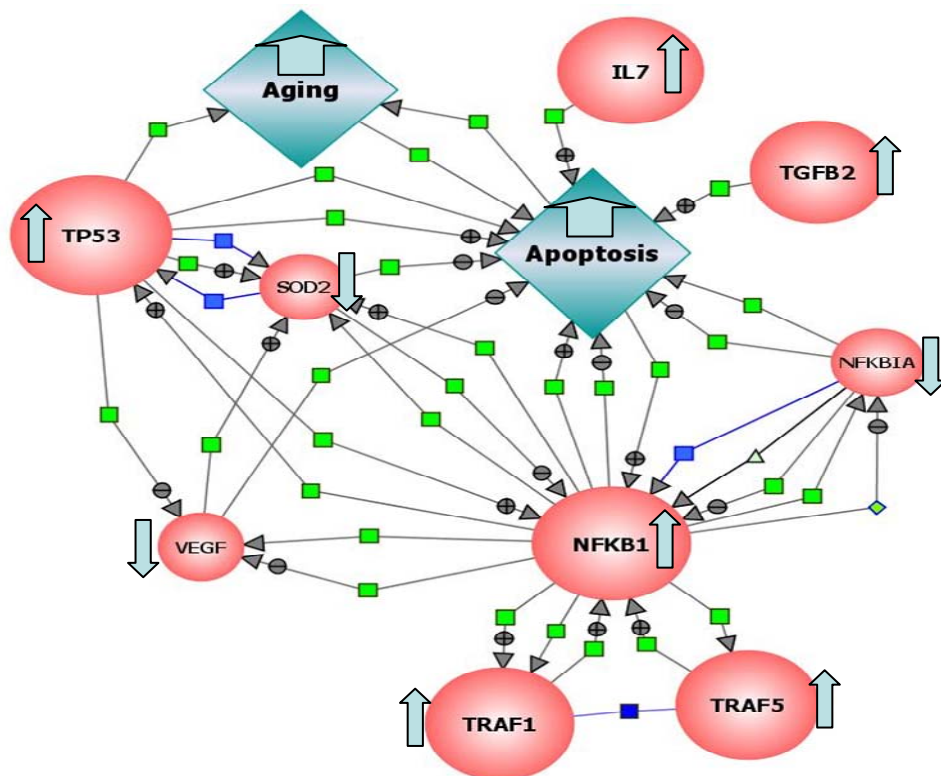

## Supplementary Figure II

Microscopic observation of cultured endothelial cells at passage one and passage four (Magnification X100)

**Figure II**

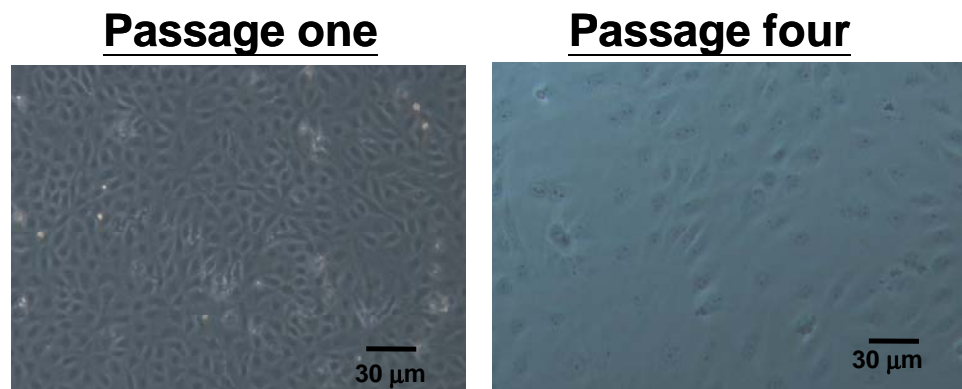

Supplement: Supplementary file 1 [file 1]
