# Supplementary material
Source: publisher figshare collection journal article supplement (https://karger.figshare.com/articles/dataset/_/5120953)
Supplement: Supplementary file 2 [file 1]

Archive with 3 entries (3 files):
- 000265563_sm_Figures.pdf
- 000265563_sm_TableS1.xls
- 000265563_sm_TableS2.xls
