# Supplementary material
Source: publisher figshare collection journal article supplement (https://karger.figshare.com/articles/dataset/_/5120953)
Supplement: Supplementary file 2 [file 1 › 000265563_sm_TableS1.xls]

## Sheet: P1 vs P4
Complete list of differential changes in P4
Probe Set ID	p-value	[P1](normalized)	[P4](normalized)	Fold change [P4]	Gene Title
Ssc.382.1.S1_at	0.00183738	3.96607	-0.644364	0.0409375	colony stimulating factor 2 (granulocyte-macrophage)
Ssc.31124.1.S1_at	0.0152886	2.997	-1.52598	0.0434959	Transcribed locus
Ssc.16297.1.S2_at	0.00513644	3.08901	-1.28692	0.0481628	selectin E (endothelial adhesion molecule 1)
Ssc.19907.1.S1_at	7.24679e-05	1.30663	-2.85398	0.0559154	tissue factor
Ssc.12776.1.A1_at	0.00320723	2.9821	-1.09647	0.0591875	MRNA, clone:PBL010003A09, expressed in periphral blood mononuclear cell
Ssc.5464.1.A1_at	0.000255606	1.89872	-1.96031	0.0689154	Carboxypeptidase E
Ssc.9957.1.A1_at	0.00235676	3.23078	-0.540861	0.0732191	Small inducible cytokine A7 precursor (CCL7) (Monocyte chemotactic protein 3) (MCP-3) (Monocyte chemoattractant protein 3) (NC28)
Ssc.62.2.S1_a_at	0.000206913	3.32122	-0.321283	0.0800753	interleukin 6 (interferon, beta 2)
Ssc.19481.1.S1_at	1.01054e-05	1.53627	-2.00432	0.0859363	Transcribed locus, strongly similar to NP_057387.1 domain binding protein 1; pp21 homolog [Homo sapiens]
Ssc.19106.1.S1_at	0.000254437	1.56988	-1.96801	0.086097	Transcribed locus, weakly similar to XP_001106412.1 similar to sulfatase 2 isoform a precursor [Macaca mulatta]
Ssc.983.1.S1_at	0.000916697	2.49091	-0.946602	0.092301	Complement component 1, r subcomponent
Ssc.10884.1.A1_at	0.00221085	2.29787	-1.07177	0.0967469	MRNA, clone:THY010006D10, expressed in thymus
Ssc.719.1.S1_at	0.00888645	3.472	0.122632	0.0981161	alveolar macrophage-derived chemotactic factor-II
Ssc.4222.1.S1_at	0.0364202	2.42007	-0.894077	0.100541	Transferrin
Ssc.1177.1.S1_at	0.00134996	2.24035	-1.03836	0.103041	complement component 1, s subcomponent
Ssc.22075.3.A1_at	0.00279245	2.85008	-0.366364	0.107586	MRNA, clone:PBL010003A09, expressed in periphral blood mononuclear cell
Ssc.719.1.S1_a_at	0.0125909	3.14313	-0.0480622	0.109485	alveolar macrophage-derived chemotactic factor-II
Ssc.3835.1.S1_at	0.000233449	1.34708	-1.82612	0.110859	alpha-actinin-2-associated LIM protein
Ssc.19389.1.A1_at	0.00040794	1.55788	-1.5819	0.113458	Transcribed locus, moderately similar to XP_001111799.1 similar to Normal mucosa of esophagus-specific gene 1 protein isoform 1 [Macaca mulatta]
Ssc.31073.1.S1_at	0.00111342	1.80895	-1.23179	0.12152	Transcribed locus
Ssc.864.1.S1_at	0.00446762	2.61892	-0.414077	0.122173	fumarate hydratase
Ssc.222.1.S1_at	0.000813395	1.76108	-1.23947	0.124952	MHC class II (SLA-DR-alpha)
Ssc.286.1.S1_s_at	0.0038301	2.34129	-0.652919	0.125503	inflammatory response protein 6
Ssc.18948.1.S1_at	1.82775e-05	2.1718	-0.809267	0.126651	Serum amyloid A2
Ssc.24529.1.S1_at	0.0264407	2.24113	-0.729196	0.127598	Transcribed locus, weakly similar to NP_066269.1 gamma C [Homo sapiens]
Ssc.10359.1.S1_at	0.000681057	2.66506	-0.28933	0.129015	Transcribed locus, weakly similar to XP_001099956.1 calcium binding protein P22 isoform 2 [Macaca mulatta]
Ssc.29006.1.S1_at	0.000103706	2.3633	-0.498725	0.137545	interferon beta
Ssc.5204.1.S1_at	0.000405447	2.50739	-0.291783	0.143669	Clone rnco1933b_j2.y1.abd, mRNA sequence
Ssc.15674.1.A1_at	0.0153437	0.583621	-2.14427	0.150947	MRNA, clone:AMP010061D07, expressed in alveolar macrophage
Ssc.22075.2.A1_at	0.0177584	1.99577	-0.719906	0.15223	MRNA, clone:PBL010003A09, expressed in periphral blood mononuclear cell
Ssc.27727.1.S1_at	0.00146337	2.02739	-0.667951	0.154391	MRNA, clone:AMP010044G02, expressed in alveolar macrophage
Ssc.26005.1.S1_at	0.000930633	2.01456	-0.656157	0.157048	Transcribed locus
Ssc.6384.1.S1_at	0.0207855	1.89481	-0.757396	0.159076	Transcribed locus
Ssc.22075.1.S1_at	0.00344144	2.3924	-0.254259	0.15969	MRNA, clone:PBL010003A09, expressed in periphral blood mononuclear cell
Ssc.6172.1.S1_at	0.00127057	2.15728	-0.427515	0.166686	MRNA, clone:LVR010104B10, expressed in liver
Ssc.8671.1.A1_at	0.00159251	1.18259	-1.36902	0.170566	Transcribed locus
Ssc.17005.1.A1_at	0.00173624	1.04941	-1.49639	0.171253	Transcribed locus
Ssc.61.1.S1_at	0.0418813	2.16721	-0.368168	0.172494	complement component 3
Ssc.13128.1.A1_at	0.00157155	2.2626	-0.207755	0.180447	Transcribed locus, weakly similar to XP_001082147.1 similar to C28H8.3 [Macaca mulatta]
Ssc.23981.1.A1_at	0.000216276	1.67634	-0.786502	0.181389	UDP-N-acetyl-alpha-D-galactosamine:polypeptide N-acetylgalactosaminyltransferase 12 (GalNAc-T12)
Ssc.20525.1.S1_at	0.0040942	1.15374	-1.27108	0.186232	Insulin-like growth factor 2 (somatomedin A)
Ssc.21582.1.S1_at	0.0258161	1.80012	-0.613085	0.187739	MRNA, clone:ITT010051H04, expressed in intestine
Ssc.11079.1.A1_at	0.00197637	0.400188	-2.01011	0.188117	ribonuclease, RNase A family, 4
Ssc.30887.1.S1_at	0.00268849	2.29584	-0.106023	0.18922	MRNA, clone:AMP010074G10, expressed in alveolar macrophage
Ssc.15885.1.S1_at	0.00323371	2.0107	-0.390371	0.189323	RNA helicase
Ssc.13311.1.A1_at	0.0381137	1.10955	-1.25942	0.193583	Transcribed locus
Ssc.26009.1.S1_at	0.00132789	1.96144	-0.391612	0.195732	Transcribed locus
Ssc.19067.1.A1_at	0.00358822	1.92961	-0.388656	0.200509	Transcribed locus
Ssc.9372.1.A1_at	0.00583686	1.56011	-0.750323	0.2016	Transcribed locus
Ssc.9522.1.A1_at	0.00228319	2.15755	-0.146117	0.202547	Transcribed locus
Ssc.21162.1.S1_s_at	0.000239006	1.82842	-0.46844	0.203505	interferon regulatory factor 7
Ssc.16648.1.S1_at	0.0110259	1.98871	-0.275858	0.208112	Thioredoxin interacting protein
Ssc.30027.1.A1_at	0.023509	1.46691	-0.796291	0.208309	Transcribed locus
Ssc.3012.1.S1_at	2.50227e-05	1.34879	-0.909236	0.209057	MRNA, clone:THY010082G01, expressed in thymus
Ssc.10805.1.A1_at	0.00483886	1.74126	-0.488268	0.213228	MRNA, clone:OVRM10121C02, expressed in ovary
Ssc.957.1.S1_at	0.000974904	1.51108	-0.716803	0.213471	C1-INH mRNA for C1 inhibitor
Ssc.90.1.S1_at	0.029787	1.56724	-0.649232	0.215167	38 kDa heparin-binding glycoprotein
Ssc.2873.1.S1_at	0.000486148	1.93225	-0.275127	0.216528	Transcribed locus, moderately similar to XP_001109350.1 similar to PDZK1 interacting protein 1 [Macaca mulatta]
Ssc.19694.1.S1_at	0.0144221	1.78054	-0.410481	0.218997	Glutathione peroxidase 3
Ssc.44.1.S1_at	0.00228434	1.60451	-0.572272	0.221168	glycoprotein GPIIIa
Ssc.10993.1.S1_a_at	0.0026055	1.50878	-0.661766	0.222126	urate transporter/channel protein, isoform (UATp,i)
Ssc.11063.1.S1_at	0.00350843	0.8702	-1.28291	0.224828	SLA-DQ beta1 domain
Ssc.4479.1.S1_at	0.00040474	0.449988	-1.70088	0.225177	Transcribed locus, weakly similar to NP_073560.2 peptide, CUB domain, EGF-like 1 [Mus musculus]
Ssc.6222.1.S1_a_at	0.019877	1.96006	-0.186701	0.225818	CD74 antigen
Ssc.1600.3.S1_at	6.1955e-06	0.175567	-1.95925	0.227697	Transcribed locus, moderately similar to XP_001088222.1 similar to family with sequence similarity 80, member A [Macaca mulatta]
Ssc.23797.1.S1_at	0.000622904	1.76735	-0.362481	0.228485	putative MIP-1beta protein
Ssc.10434.1.S1_at	0.000648441	1.10099	-1.00731	0.231921	Transcribed locus, strongly similar to XP_344617.3 similar to Frizzled 8 precursor (Frizzled-8) (Fz-8) (mFz8) [Rattus norvegicus]
Ssc.7158.1.A1_a_at	0.0242741	1.24785	-0.858641	0.232211	calpain, small subunit 1
Ssc.8594.1.A1_at	0.000282991	1.78431	-0.297804	0.236168	MRNA, clone:ITT010090B11, expressed in intestine
Ssc.290.1.S1_at	0.0401124	1.29341	-0.774834	0.238449	selectin P (granule membrane protein 140kDa, antigen CD62)
Ssc.11048.1.S1_at	0.0189713	1.15722	-0.907097	0.239099	MRNA, clone:LNG010066H03, expressed in lung
Ssc.12911.1.A1_a_at	0.00218709	1.65357	-0.3967	0.241439	MRNA, clone:ITT010090H07, expressed in intestine
Ssc.19035.1.S1_at	0.000986901	0.391242	-1.64738	0.243396	Transcribed locus
Ssc.29329.1.A1_at	0.00315523	0.981476	-1.05253	0.244176	Transcribed locus
Ssc.11102.1.S1_at	0.0153073	1.2951	-0.729022	0.245855	MHC class II SLA-DQ alpha chain mRNA (haplotype c)
Ssc.27703.1.S1_at	0.00469729	1.50102	-0.502969	0.249309	Transcribed locus
Ssc.13067.1.A1_at	0.00148494	0.366899	-1.63334	0.249959	MRNA, clone:AMP010044G02, expressed in alveolar macrophage
Ssc.16151.1.S1_at	0.00573396	1.82271	-0.169448	0.251363	granulocyte colony-stimulating factor
Ssc.30532.1.A1_at	0.000246234	1.62854	-0.360631	0.251884	MRNA, clone:AMP010022C06, expressed in alveolar macrophage
Ssc.22030.1.S1_at	0.0121245	1.02707	-0.958919	0.25244	RANTES protein
Ssc.9972.1.A1_at	0.00142327	0.668133	-1.28339	0.258544	Transcribed locus
SscAffx.1.1.S1_at	0.00137533	1.75824	-0.188286	0.25944	interferon stimulated exonuclease gene 20kDa
Ssc.26631.1.A1_at	0.00287396	1.66683	-0.265879	0.261937	Transcribed locus
Ssc.9683.1.A1_at	0.0231607	1.25661	-0.674827	0.262167	Transcribed locus
Ssc.29079.1.A1_at	0.00217558	1.5671	-0.360987	0.262778	Transcribed locus
Ssc.8767.1.A1_at	0.000238027	0.277351	-1.63914	0.264897	Transcribed locus
Ssc.12966.1.S1_at	0.00345173	1.24566	-0.657304	0.267394	Transcribed locus, strongly similar to XP_001115748.1 LIM domain only 2 (rhombotin-like 1) isoform 1 [Macaca mulatta]
Ssc.28465.1.S1_at	0.00234934	1.65385	-0.247007	0.267784	Transcribed locus, strongly similar to XP_001092895.1 similar to phosphoglucomutase 5 [Macaca mulatta]
Ssc.31140.1.S1_at	0.00159914	1.47486	-0.419379	0.269015	MRNA, clone:AMP010047A02, expressed in alveolar macrophage
Ssc.8861.1.A1_at	0.00255852	1.45276	-0.429775	0.271206	Transcribed locus
Ssc.9035.1.A1_at	5.21359e-05	0.186567	-1.66703	0.276701	Transcribed locus
Ssc.21.1.S1_s_at	0.00656262	1.74066	-0.110206	0.277227	RNA helicase
Ssc.22406.1.A1_at	0.00419512	0.796561	-1.04831	0.27838	Aquaporin 1
Ssc.24282.1.S1_at	0.0010679	1.78334	-0.0611122	0.278462	Chemokine (C-X-C motif) ligand 2
Ssc.17280.1.S1_at	1.22818e-05	0.80897	-1.03215	0.279105	Transcribed locus
Ssc.16570.1.S1_at	0.000834977	0.197007	-1.64042	0.27982	MRNA, clone:AMP010044G02, expressed in alveolar macrophage
Ssc.8965.1.A1_at	0.00483133	0.877356	-0.954354	0.280932	Endothelial PAS domain protein 1
Ssc.30752.1.S1_at	0.0055556	1.37692	-0.450936	0.281684	MRNA, clone:AMP010035E04, expressed in alveolar macrophage
Ssc.21872.1.S1_at	1.38767e-06	1.73414	-0.0923691	0.281947	Transcribed locus, moderately similar to XP_001083439.1 similar to small trans-membrane and glycosylated protein [Macaca mulatta]
Ssc.9039.2.S1_at	0.00132496	1.47111	-0.335584	0.285844	Transcribed locus
Ssc.14073.1.S1_at	0.0322596	1.66956	-0.129953	0.287272	MRNA, clone:LVRM10122H12, expressed in liver
Ssc.18802.1.A1_at	0.0103779	0.876444	-0.913739	0.289135	Transcribed locus
Ssc.47.1.S1_at	0.00716889	0.449593	-1.33197	0.290869	insulin-like growth factor binding protein 2
Ssc.18038.1.A1_at	0.00681311	1.43562	-0.345781	0.2909	Transcribed locus
Ssc.1674.1.A1_at	0.000236892	1.45743	-0.320233	0.291656	MRNA, clone:AMP010002E09, expressed in alveolar macrophage
Ssc.7864.1.A1_at	0.000156349	1.26988	-0.495389	0.294172	Transcribed locus
Ssc.8072.2.A1_at	0.00359299	0.402694	-1.35625	0.295465	Transcribed locus
Ssc.8072.1.A1_at	0.0362213	0.605947	-1.15287	0.29549	Transcribed locus
Ssc.14224.1.A1_at	0.0138393	0.687663	-1.06889	0.295954	Transcribed locus
Ssc.17861.1.A1_at	0.00168236	1.29744	-0.455363	0.296725	MRNA, clone:AMP010022C06, expressed in alveolar macrophage
Ssc.9039.1.A1_at	0.00142025	1.43728	-0.310314	0.297798	Transcribed locus
Ssc.30125.1.A1_at	0.000230936	0.415967	-1.31997	0.300215	Transcribed locus, moderately similar to XP_344020.3 hypothetical protein [Rattus norvegicus]
Ssc.2641.1.S1_at	0.00395603	1.68683	-0.0151529	0.307363	MRNA, clone:UTR010026A05, expressed in uterus
Ssc.13226.1.A1_at	0.00171378	1.5523	-0.143992	0.308577	Transcribed locus, moderately similar to XP_001112626.1 B aggressive lymphoma gene isoform 2 [Macaca mulatta]
Ssc.8271.1.S1_at	0.0200553	1.13299	-0.563073	0.308627	Transcribed locus
Ssc.1191.1.S1_at	0.00045383	0.115152	-1.57798	0.309254	Transcribed locus
Ssc.21194.1.S1_at	0.00140509	0.322894	-1.35462	0.312621	Transcribed locus, weakly similar to XP_001106613.1 similar to protein tyrosine phosphatase, non-receptor type 7 isoform 2 isoform 3 [Macaca mulatta]
Ssc.19596.1.A1_at	0.000612685	0.433986	-1.24247	0.312851	Transcribed locus
Ssc.28673.1.S1_at	0.0236252	1.23425	-0.44064	0.31319	Transcribed locus
Ssc.19224.1.S1_at	0.00567291	1.53185	-0.136308	0.314655	Transcribed locus
Ssc.30869.1.S1_at	8.71497e-05	1.34298	-0.317305	0.316378	MRNA, clone:OVR010083E07, expressed in ovary
Ssc.26300.2.S1_at	0.000518832	1.20507	-0.454911	0.316443	Transcribed locus, moderately similar to XP_001104582.1 similar to unc-93 homolog B1 isoform 3 [Macaca mulatta]
Ssc.11557.1.A1_at	0.00333037	1.29619	-0.358741	0.317553	Transcribed locus, moderately similar to XP_001088541.1 similar to interferon, alpha-inducible protein (clone IFI-15K) [Macaca mulatta]
Ssc.5713.1.S1_at	0.0010716	0.323607	-1.32228	0.319551	gelatinase A
Ssc.5118.1.S1_at	9.0885e-05	0.945764	-0.700002	0.319577	MRNA, clone:LVR010042B08, expressed in liver
Ssc.3706.1.S1_at	0.000560583	1.75843	0.115205	0.320141	Superoxide dismutase 2, mitochondrial
Ssc.8169.1.A1_at	0.0205739	1.7362	0.0942794	0.32043	Transcribed locus
Ssc.6080.1.S1_at	0.00170554	0.215405	-1.42636	0.320463	antileukoproteinase
Ssc.6233.1.S1_at	0.00649638	1.26072	-0.376783	0.321412	MRNA, clone:LNG010078D01, expressed in lung
Ssc.5663.1.S1_at	0.000309043	1.33305	-0.28476	0.32583	Transcribed locus
Ssc.113.1.S2_at	0.0347389	1.18108	-0.43282	0.326715	interleukin 1, alpha
Ssc.9069.1.A1_at	0.00142501	0.312051	-1.29456	0.328369	MRNA, clone:LNG010008G03, expressed in lung
Ssc.23834.1.S1_at	0.000135786	1.50216	-0.100713	0.32922	Transcribed locus, moderately similar to XP_001108288.1 similar to sushi domain containing 3 [Macaca mulatta]
Ssc.22043.1.S1_at	0.0128368	0.452661	-1.14841	0.329632	Transcribed locus
Ssc.19596.2.S1_at	0.0028811	1.18148	-0.419514	0.32965	Transcribed locus
Ssc.13068.1.A1_at	4.46311e-05	1.492	-0.108265	0.329817	Transcribed locus, weakly similar to XP_001105794.1 similar to poly (ADP-ribose) polymerase family, member 15 [Macaca mulatta]
Ssc.221.1.S1_at	0.00298615	1.34281	-0.255872	0.330178	myxovirus (influenza virus) resistance 1, interferon-inducible protein p78
Ssc.4141.1.A1_at	0.0390854	-0.393797	-1.99194	0.330302	Transcribed locus
Ssc.19648.1.S1_at	0.00383559	1.01452	-0.57746	0.331715	Transcribed locus, moderately similar to XP_001084703.1 similar to solute carrier family 15, member 3 [Macaca mulatta]
Ssc.30752.2.A1_at	0.0331453	0.924759	-0.662208	0.332871	MRNA, clone:AMP010035E04, expressed in alveolar macrophage
Ssc.20559.1.A1_at	0.0042365	0.186111	-1.39789	0.333555	CD59 molecule, complement regulatory protein
Ssc.6070.1.A1_at	0.00363277	0.654428	-0.918487	0.336129	Transcribed locus, weakly similar to XP_001088254.1 oxysterol-binding protein-like protein 2 [Macaca mulatta]
Ssc.12720.1.S1_at	0.000137341	1.56704	-0.00523675	0.336276	Transcribed locus
Ssc.30150.1.A1_at	0.026305	0.6697	-0.892985	0.33852	Transcribed locus
Ssc.24509.1.A1_at	0.00133429	1.73861	0.177356	0.338856	Transcribed locus
Ssc.11163.1.S1_at	2.73366e-05	1.41021	-0.147586	0.339669	MRNA, clone:LVRM10150F09, expressed in liver
Ssc.336.1.S1_at	0.00559949	1.37553	-0.182176	0.33969	ubiquitin-specific protease
Ssc.4679.1.S1_at	0.00276215	0.923409	-0.631567	0.340334	angiogenin
Ssc.6191.1.S1_at	0.000475456	1.44404	-0.100938	0.342701	Transcribed locus, moderately similar to XP_001112746.1 similar to deltex 3-like isoform 3 [Macaca mulatta]
Ssc.15661.1.S1_at	0.00157934	0.435412	-1.1066	0.343407	MRNA, clone:OVRM10193B04, expressed in ovary
Ssc.220.1.A1_at	0.000869537	1.4575	-0.0797104	0.344551	myxovirus (influenza virus) resistance 2 (mouse)
Ssc.12758.1.A1_at	6.59625e-05	1.50569	-0.0284939	0.345275	Proteasome beta 9 subunit
Ssc.9069.3.S1_at	0.00999693	0.640082	-0.890015	0.346254	MRNA, clone:LNG010008G03, expressed in lung
Ssc.29301.1.A1_at	5.54742e-06	1.46339	-0.0553293	0.348997	Transcribed locus, strongly similar to XP_001104481.1 hypothetical protein [Macaca mulatta]
Ssc.11779.1.S1_at	0.0125496	1.18517	-0.333256	0.349067	secreted folate binding protein
Ssc.14129.1.A1_at	0.0195484	0.601775	-0.912723	0.350018	Transcribed locus, weakly similar to XP_001102057.1 hypothetical protein [Macaca mulatta]
Ssc.3714.1.S1_a_at	2.17121e-06	0.971895	-0.540856	0.350442	Transcribed locus, moderately similar to XP_001085168.1 similar to brain expressed X-linked 2 isoform 2 [Macaca mulatta]
Ssc.5127.1.S1_at	0.0394926	0.507133	-1.00095	0.351578	fructose 1,6-bisphosphatase
Ssc.10588.1.A1_at	0.00723532	1.00783	-0.499723	0.351708	MRNA, clone:AMP010024D12, expressed in alveolar macrophage
Ssc.21901.1.S1_at	0.000675891	0.273355	-1.23066	0.352571	Transcribed locus
Ssc.13849.1.S1_at	0.00521226	0.405743	-1.09565	0.353213	Transcribed locus, weakly similar to XP_001104734.1 cathepsin C isoform 2 [Macaca mulatta]
Ssc.6583.1.S1_at	0.00143118	0.620625	-0.880179	0.353356	scavenger receptor for phosphatidylserine and oxidized low density lipoprotein
Ssc.12286.1.A1_at	0.0185367	1.39723	-0.100055	0.35422	Transcribed locus, weakly similar to NP_001035900.1 leukemia protein [Pan troglodytes]
Ssc.30455.1.A1_at	0.00290277	0.766451	-0.730707	0.354251	Transcribed locus
Ssc.17375.1.S1_at	0.000877965	0.798022	-0.69275	0.355822	Transcribed locus
Ssc.7558.1.A1_at	0.00231416	1.32665	-0.162495	0.356223	Transcribed locus
Ssc.5982.1.A1_at	0.00187287	1.00732	-0.480342	0.35659	interferon consensus sequence binding protein 1
Ssc.12446.1.A1_at	0.000977704	1.2767	-0.197054	0.360044	MRNA, clone:AMP010099D07, expressed in alveolar macrophage
Ssc.5227.1.S2_at	0.0147523	0.853388	-0.614436	0.361527	phospholamban
Ssc.2197.1.S1_at	0.00794597	0.397915	-1.06896	0.361764	Transcribed locus, moderately similar to XP_001093138.1 transmembrane protein 45A isoform 1 [Macaca mulatta]
Ssc.12918.2.A1_at	0.00929241	1.38476	-0.0812379	0.361984	MRNA, clone:OVR010005A06, expressed in ovary
Ssc.9726.1.A1_at	0.00120619	0.712091	-0.748355	0.363381	Transcribed locus
Ssc.12504.1.A1_at	0.00127655	1.20777	-0.252643	0.363389	MRNA, clone:UTR010100D09, expressed in uterus
Ssc.30893.1.A1_at	0.00158427	0.49618	-0.959773	0.364514	Transcribed locus
Ssc.3139.1.A1_at	0.000357179	1.38331	-0.0707662	0.364988	Regulator of G-protein signalling 2, 24kDa
Ssc.18072.1.A1_at	0.0026835	1.30632	-0.146011	0.365431	Transcribed locus
Ssc.17280.2.A1_at	0.000656759	0.548903	-0.898421	0.366701	Transcribed locus
Ssc.5227.1.S1_at	0.00270089	0.46367	-0.982209	0.367068	phospholamban
Ssc.12430.1.S1_at	0.00406914	0.873138	-0.5704	0.367665	MRNA, clone:LVR010052A08, expressed in liver
Ssc.18261.1.S1_at	0.0326383	0.391301	-1.04876	0.368552	Transcribed locus
Ssc.17353.1.S1_at	0.0408338	1.14059	-0.298821	0.368718	Transcribed locus, weakly similar to NP_849186.2 serine, 7 (enterokinase) isoform 2 [Mus musculus]
Ssc.5085.1.A1_at	0.00141024	1.40392	-0.0347654	0.368904	Transcribed locus
Ssc.19063.1.S1_at	0.0218661	0.195809	-1.24245	0.369013	Transcribed locus
Ssc.6462.1.A1_at	0.00813221	1.09382	-0.342665	0.369465	Transcribed locus
Ssc.13777.1.S1_at	0.000442124	1.26183	-0.167327	0.371348	SLA-DM alpha chain
Ssc.14415.1.A1_at	0.010901	1.25327	-0.174644	0.371667	Transcribed locus
Ssc.12286.2.A1_at	4.62668e-06	1.10605	-0.320864	0.371925	Transcribed locus, weakly similar to NP_001035900.1 leukemia protein [Pan troglodytes]
Ssc.7654.1.A1_at	0.00511687	0.354265	-1.07109	0.372329	MRNA, clone:OVR010061G09, expressed in ovary
Ssc.19494.1.S1_at	3.05321e-05	1.41464	-0.00908065	0.37275	interferon regulatory factor 1
Ssc.2464.1.S1_at	0.00830036	1.47699	0.0552738	0.373268	MRNA, clone:OVR010002A02, expressed in ovary
Ssc.3059.1.S1_at	0.0104571	0.996219	-0.422078	0.374154	aldose reductase
Ssc.16605.1.S1_at	0.0010533	0.849982	-0.561115	0.376026	Transcribed locus, strongly similar to XP_001116086.1 similar to DNA-damage-inducible transcript 3 [Macaca mulatta]
Ssc.8098.1.A1_at	2.16905e-05	0.924423	-0.481109	0.377479	MRNA, clone:AMP010019E12, expressed in alveolar macrophage
Ssc.8683.1.S1_at	0.0205341	0.661732	-0.743214	0.377632	Transcribed locus
Ssc.4254.1.S1_at	0.00349359	0.480704	-0.922422	0.378109	MRNA, clone:OVRM10224A05, expressed in ovary
Ssc.19204.1.A1_at	0.033384	0.65189	-0.748994	0.378697	Transcribed locus
Ssc.3983.1.S1_at	0.0125623	1.37558	-0.0217063	0.379644	MRNA, clone:UTR010100C03, expressed in uterus
Ssc.10742.1.A1_at	0.00079612	0.108752	-1.28787	0.379819	MRNA, clone:UTR010098A04, expressed in uterus
Ssc.21300.1.S1_at	0.000509772	0.720194	-0.674637	0.380289	MRNA, clone:AMP010028D12, expressed in alveolar macrophage
Ssc.30956.1.A1_s_at	0.00280428	1.44999	0.0551674	0.380293	MRNA, clone:OVRM10094E10, expressed in ovary /// MRNA, clone:UTR010079E09, expressed in uterus
Ssc.26292.1.S1_at	0.00975947	0.601485	-0.793073	0.380361	Transcribed locus, strongly similar to NP_066390.1 histone family, member A [Homo sapiens]
Ssc.29031.1.A1_at	0.00827765	0.454054	-0.939412	0.380649	Transcribed locus, strongly similar to NP_066407.1 histone family, member B [Homo sapiens]
Ssc.16511.1.A1_at	0.00122388	0.204202	-1.18725	0.381181	Transcribed locus
Ssc.7275.2.A1_at	0.000136193	1.04239	-0.343676	0.382607	MRNA, clone:AMP010054C01, expressed in alveolar macrophage
Ssc.29458.1.A1_at	0.0256079	1.14681	-0.238251	0.382873	Transcribed locus
Ssc.18278.2.A1_at	0.00214611	1.04265	-0.338111	0.384017	nebulin-related anchoring protein
Ssc.29532.1.A1_at	0.00556991	0.392017	-0.987588	0.384324	Transcribed locus
Ssc.5885.1.A1_at	0.0400283	1.09713	-0.281128	0.384682	Transcribed locus
Ssc.3921.1.S1_at	0.000497973	1.14981	-0.223714	0.385946	endothelial PAS domain protein 1
Ssc.17894.1.A1_at	0.00713674	1.06925	-0.303884	0.386051	Transcribed locus
Ssc.28517.1.S1_at	7.40028e-05	1.27413	-0.0964833	0.386726	Transcribed locus, strongly similar to XP_001101558.1 dual specificity phosphatase 10 isoform 4 [Macaca mulatta]
Ssc.20101.1.S1_at	0.0064315	0.970707	-0.399646	0.386797	Transcribed locus, moderately similar to NP_001041635.1 protein LOC716339 [Macaca mulatta]
Ssc.3411.1.A1_at	0.00200208	0.406469	-0.96228	0.387227	Transcribed locus
Ssc.15612.1.S1_at	0.000479192	0.408025	-0.958473	0.387832	MRNA, clone:AMP010044G02, expressed in alveolar macrophage
Ssc.13009.1.A1_at	4.90247e-05	0.92117	-0.444962	0.38793	Transcribed locus, weakly similar to NP_006426.1 induced transmembrane protein 2 (1-8D) [Homo sapiens]
Ssc.19095.1.A1_at	0.0112121	1.04378	-0.315052	0.389897	Transcribed locus, weakly similar to XP_001082375.1 similar to neuropilin- and tolloid-like protein 1 isoform 3 precursor [Macaca mulatta]
Ssc.3706.1.S2_at	0.00429124	1.27977	-0.0742311	0.391205	Superoxide dismutase 2, mitochondrial
Ssc.18715.1.A1_at	0.00156965	0.314654	-1.03788	0.391604	Transcribed locus, strongly similar to XP_001082695.1 similar to Cbp/p300-interacting transactivator, with Glu/Asp-rich carboxy-terminal domain, 4 [Macaca mulatta]
Ssc.30637.1.A1_at	0.000854567	1.27809	-0.0719364	0.392286	Transcribed locus
Ssc.25814.1.S1_at	0.00761757	1.08375	-0.263175	0.39313	MRNA, clone:THY010006E04, expressed in thymus
Ssc.4759.1.S1_at	0.000521602	1.31154	-0.0344131	0.393394	Nuclear factor of kappa light polypeptide gene enhancer in B-cells inhibitor, alpha
Ssc.18470.1.A1_at	0.0015284	0.51133	-0.830997	0.394384	Transcribed locus
Ssc.8942.1.S1_at	9.81651e-05	1.23228	-0.109728	0.394471	Transcribed locus
Ssc.17029.1.A1_at	0.006674	1.17273	-0.165152	0.3956	Transcribed locus
Ssc.23072.1.S1_at	0.00119966	0.322986	-1.01415	0.395805
Ssc.1813.1.S1_at	2.53907e-05	1.34675	0.0131143	0.396768	MRNA, clone:ITT010095H05, expressed in intestine
Ssc.10232.1.A1_at	0.0263634	0.341293	-0.986594	0.398351	Transcribed locus
Ssc.21142.1.S1_at	0.00234353	0.803628	-0.521113	0.399221	MRNA, clone:UTR010039H07, expressed in uterus
Ssc.10820.1.A1_at	7.24744e-05	1.17266	-0.149022	0.400069	MRNA, clone:OVRM10005B12, expressed in ovary
Ssc.9070.1.A1_at	0.000899294	1.50617	0.184947	0.400195	Transcribed locus
Ssc.19664.1.S1_at	0.00589696	0.495506	-0.825079	0.400372	Transcribed locus
Ssc.18059.1.A1_a_at	0.0070993	0.924778	-0.394137	0.400836	Transcribed locus, moderately similar to XP_001116602.1 similar to leucine-rich repeats and immunoglobulin-like domains 3 isoform 5 [Macaca mulatta]
Ssc.10025.3.S1_at	0.0112718	1.30636	-0.00990272	0.401575	MRNA, clone:SPL010056A03, expressed in spleen
Ssc.2143.1.S1_at	0.0178192	0.474051	-0.841764	0.401699	Transcribed locus
Ssc.11297.1.A1_at	0.000955838	1.14384	-0.171805	0.401746	Transcribed locus
Ssc.7207.2.A1_at	0.000576427	1.22362	-0.0907137	0.402111	MRNA, clone:LNG010015E01, expressed in lung
Ssc.1086.1.A1_at	0.00525473	0.790544	-0.523664	0.402146	Clone rjca11c_i8.y1.abd, mRNA sequence
Ssc.3509.1.S1_at	0.000606644	1.44131	0.128018	0.402402	Transcribed locus
Ssc.29749.1.A1_at	0.00595318	1.27048	-0.0427041	0.402431	MRNA, clone:OVR010074D09, expressed in ovary
Ssc.6433.1.S1_at	6.99997e-05	1.14751	-0.165517	0.402475	Transcribed locus, strongly similar to XP_001098884.1 zinc finger, NFX1-type containing 1 isoform 1 [Macaca mulatta]
Ssc.113.1.S1_at	0.0255778	1.29589	-0.0154638	0.402943	interleukin 1, alpha
Ssc.20347.1.S1_at	0.00566565	0.983452	-0.327216	0.403134	Transcribed locus
Ssc.4538.1.S1_at	7.1874e-05	0.121613	-1.18592	0.404011	Transcribed locus, strongly similar to NP_001038202.1 protein LOC704537 [Macaca mulatta]
Ssc.16236.1.S1_at	0.0140832	0.689072	-0.615058	0.404965	dipeptidyl peptidase IV
Ssc.27027.1.S1_at	0.00910212	1.07234	-0.231783	0.404966	Transcribed locus
Ssc.9726.3.A1_at	0.0111286	0.88163	-0.404637	0.41001	Transcribed locus
Ssc.1013.1.A1_at	0.0108977	1.0813	-0.203044	0.410557	microsomal glutathione S-transferase 1
Ssc.18574.1.A1_at	0.0195002	1.29108	0.00851274	0.411062	MRNA, clone:ITT010102B03, expressed in intestine
Ssc.12918.1.S1_at	0.00137115	1.34394	0.0616726	0.411148	MRNA, clone:OVR010005A06, expressed in ovary
Ssc.11073.1.S1_at	0.00788584	1.24757	-0.0340166	0.411344	proteasome subunit LMP7
Ssc.11074.1.S1_at	0.00206642	1.39336	0.116376	0.412656	Complement factor D
Ssc.3517.1.S1_at	0.010526	1.21007	-0.0628377	0.413824	phospholipid transfer protein
Ssc.3240.1.A1_at	0.00209377	0.919305	-0.352527	0.414133	Transcribed locus
Ssc.11025.1.S1_at	0.0303347	0.993163	-0.273334	0.415668	MRNA, clone:THY010124E12, expressed in thymus
Ssc.24652.1.S1_at	0.0450525	0.20704	-1.05227	0.417745	Transcribed locus, weakly similar to NP_032305.2 activated protein kinase kinase kinase kinase 1 [Mus musculus]
Ssc.14323.1.A1_at	0.000424552	1.12568	-0.132499	0.41807	MRNA, clone:LNG010045C06, expressed in lung
Ssc.23169.1.S1_at	0.0152922	0.886763	-0.37068	0.418285	Poliovirus receptor related 2
Ssc.10593.1.S1_at	0.00757799	1.31943	0.0750616	0.422093	MRNA, clone:AMP010024D12, expressed in alveolar macrophage
Ssc.26189.1.S1_a_at	0.0211566	1.10519	-0.135959	0.423034	Transcribed locus, weakly similar to NP_001069429.1 transporter protein 4 [Bos taurus]
Ssc.9919.1.A1_at	0.00136621	1.21988	-0.0183162	0.423902	Transcribed locus
Ssc.15332.1.S1_at	0.045015	0.0724484	-1.16493	0.424142	MRNA, clone:AMP010034C08, expressed in alveolar macrophage
Ssc.4957.1.S1_at	0.0123944	0.606643	-0.630414	0.424237	MRNA, clone:AMP010044G02, expressed in alveolar macrophage
Ssc.22067.1.A1_at	0.0176265	1.02472	-0.209702	0.425012	Transcribed locus, weakly similar to NP_065262.1 carrier family 16, member 8 [Mus musculus]
Ssc.17159.1.S1_at	0.029422	0.930191	-0.302946	0.425391	MRNA, clone:OVR010041B12, expressed in ovary
Ssc.809.1.S1_at	0.0121743	0.927884	-0.304955	0.425479	MRNA, clone:LNG010045B12, expressed in lung
Ssc.7314.1.A1_at	0.0291951	0.810681	-0.416909	0.42703	prostaglandin G/H synthase-2
Ssc.26980.1.S1_at	0.0180064	0.824988	-0.402525	0.427053	Transcribed locus, moderately similar to NP_065232.1 blood group (Auberger b antigen included) [Mus musculus]
Ssc.5296.1.A1_at	0.00239147	1.15288	-0.0690011	0.428723	MRNA, clone:ITT010018F09, expressed in intestine
Ssc.883.1.S1_a_at	0.00296598	0.935834	-0.285483	0.428891	MRNA, clone:TCH010087D01, expressed in trachea
Ssc.7306.1.A1_at	0.00423748	0.4204	-0.798443	0.429627	Transcribed locus
Ssc.15492.1.S1_at	0.0381326	0.992935	-0.224746	0.429973	Transcribed locus
Ssc.14073.2.S1_at	0.0317207	0.928408	-0.289215	0.429991	MRNA, clone:LVRM10122H12, expressed in liver
Ssc.4657.1.S1_at	1.88437e-05	0.146921	-1.07051	0.430048	MRNA, clone:UTR010061G09, expressed in uterus
Ssc.5119.1.S1_at	0.00188569	1.0808	-0.136049	0.430222	MRNA, clone:TCH010087F05, expressed in trachea
Ssc.10025.1.S1_at	0.00184082	1.2793	0.0628526	0.430342	MRNA, clone:SPL010056A03, expressed in spleen
Ssc.2181.2.A1_a_at	0.00156557	0.307659	-0.904234	0.431702	Transcribed locus, weakly similar to XP_001093474.1 similar to ion transporter protein isoform 1 [Macaca mulatta]
Ssc.24234.1.A1_at	0.00135381	0.91418	-0.294774	0.432582	MRNA, clone:LNG010079A10, expressed in lung
Ssc.10030.1.A1_at	0.0428255	1.07898	-0.125428	0.433948	MRNA, clone:TCH010055C02, expressed in trachea
Ssc.15973.1.S1_at	0.0313676	1.04919	-0.15409	0.434287	ATP-diphosphohydrolase
Ssc.15479.1.S1_at	0.0460609	1.13716	-0.0650984	0.434594	MRNA, clone:LVRM10067F11, expressed in liver
Ssc.2166.1.A1_at	0.0328146	0.52707	-0.671513	0.435703	MRNA, clone:AMP010044G02, expressed in alveolar macrophage
Ssc.19040.1.A1_at	0.0282415	0.355957	-0.84043	0.436367	Transcribed locus
Ssc.12117.2.A1_at	0.00407855	0.257475	-0.938777	0.436408	MRNA, clone:OVRM10031C11, expressed in ovary
Ssc.5105.2.S1_a_at	0.000857728	0.124816	-1.07114	0.436496	G protein-coupled receptor
Ssc.8947.1.S1_at	0.00197305	1.23147	0.0363524	0.436752	Transcribed locus, strongly similar to XP_001095506.1 basic helix-loop-helix domain containing, class B, 2 [Macaca mulatta]
Ssc.30513.1.A1_at	0.0134878	0.628114	-0.566452	0.436918	Transcribed locus, moderately similar to XP_001084178.1 similar to Ca2+-dependent activator protein for secretion 2 isoform a isoform 5 [Macaca mulatta]
Ssc.27727.2.S1_a_at	0.0173669	1.06351	-0.129651	0.437345	MRNA, clone:AMP010044G02, expressed in alveolar macrophage
Ssc.19143.1.A1_at	0.0052303	0.944518	-0.238844	0.440324	Transcribed locus
Ssc.8479.1.A1_at	0.0180004	0.217397	-0.956743	0.443148	selenoprotein P
Ssc.27556.1.S1_at	0.00392443	0.468185	-0.704202	0.443687	Transcribed locus
Ssc.11185.1.A1_at	0.00121084	0.28812	-0.881702	0.444476	MRNA, clone:PBL010037C04, expressed in periphral blood mononuclear cell
Ssc.1816.1.A1_at	0.00312863	0.63761	-0.531486	0.4447	Transcribed locus, moderately similar to XP_001099389.1 phosphatidylinositol-4-phosphate 5-kinase type II alpha [Macaca mulatta]
Ssc.22072.2.S1_at	0.00216915	0.054342	-1.10937	0.446363	MRNA, clone:AMP010048B02, expressed in alveolar macrophage
Ssc.6019.1.S1_at	0.000459064	0.412211	-0.749778	0.446896	deoxyribonuclease II
Ssc.1303.1.S1_at	0.000376767	0.957582	-0.203406	0.447206	MRNA, clone:TCH010084D08, expressed in trachea
Ssc.26047.1.S1_at	0.0434386	0.404024	-0.753416	0.448307
Ssc.4985.1.A1_at	0.0114172	0.478686	-0.674107	0.449754	Transcribed locus
Ssc.27171.1.S1_at	0.00065553	0.648472	-0.500352	0.450993	Transcribed locus, strongly similar to XP_001099250.1 delta-like 4 protein [Macaca mulatta]
Ssc.10460.1.S1_at	0.0166119	1.09121	-0.0567439	0.451265	MRNA, clone:LVRM10087F11, expressed in liver
Ssc.17073.1.S1_at	0.00640208	0.70013	-0.447773	0.451281	MRNA, clone:AMP010044G02, expressed in alveolar macrophage
Ssc.30877.1.S1_at	0.00475429	0.828949	-0.314342	0.452726	MRNA, clone:THY010052B10, expressed in thymus
Ssc.978.1.S1_at	0.0433955	0.572873	-0.566923	0.453824	von Willebrand factor
Ssc.6391.1.S1_at	0.00414006	0.844408	-0.29499	0.453949	solute carrier family 2 (facilitated glucose transporter), member 1
Ssc.12780.1.S1_at	0.000836612	0.899043	-0.239229	0.454303	MRNA, clone:TCH010086G08, expressed in trachea
Ssc.3828.1.S1_at	0.000941259	1.02057	-0.114889	0.455189	Transcribed locus
Ssc.24512.1.S1_at	0.029066	0.6286	-0.489813	0.4606	Transcribed locus, strongly similar to XP_001113486.1 similar to mitogen-activated protein kinase kinase kinase 11 [Macaca mulatta]
Ssc.29981.1.A1_at	0.0463394	0.601072	-0.514283	0.461578
Ssc.1697.1.S1_at	0.00629023	0.502083	-0.610615	0.462428	MRNA, clone:LVRM10162A10, expressed in liver
Ssc.5104.1.S1_at	0.0227085	0.567513	-0.544399	0.46268	MRNA, clone:OVRM10113G11, expressed in ovary
Ssc.208.1.S1_at	0.0145547	0.0710959	-1.03713	0.463866	cytochrome P450 1A1
Ssc.24451.1.S1_at	0.0451886	0.301306	-0.799883	0.466132	Transcribed locus, strongly similar to XP_001112011.1 transient receptor potential cation channel, subfamily C, member 1 [Macaca mulatta]
Ssc.10534.3.A1_a_at	0.000972397	0.307262	-0.790455	0.467255	Transcribed locus, strongly similar to XP_001112722.1 similar to RAS p21 protein activator 2 isoform 1 [Macaca mulatta]
Ssc.18456.1.S1_at	0.0185085	0.366347	-0.723005	0.469972	MRNA, clone:SPL010002F07, expressed in spleen
Ssc.12795.1.S1_at	0.00211486	0.986676	-0.0999991	0.470845	MRNA, clone:OVRM10006B08, expressed in ovary
Ssc.2624.2.S1_at	0.0121981	0.402954	-0.678028	0.472707	Transcribed locus
Ssc.3522.2.S1_at	2.4874e-05	1.06606	-0.0144753	0.472853	Transcribed locus
Ssc.15740.1.S2_at	0.0207176	0.579716	-0.499342	0.473338	vascular endothelial growth factor
Ssc.19157.1.S1_at	0.00718657	0.186707	-0.891074	0.473757	MRNA, clone:LVRM10182G10, expressed in liver
Ssc.16110.1.A1_at	0.00110592	0.613816	-0.460868	0.474775	putative inhibitor of apoptosis
Ssc.24627.1.A1_at	0.0118584	0.954892	-0.11448	0.476527	Transcribed locus
Ssc.5613.1.A1_at	0.00140149	0.373504	-0.688671	0.478909	Transcribed locus
Ssc.16351.1.S2_at	0.000181996	0.573537	-0.482387	0.480989	signal transducer and activator of transcription 5a
Ssc.7292.1.S1_at	3.30572e-05	0.0866378	-0.967228	0.481676	Transcribed locus
Ssc.5540.1.S1_at	5.27854e-06	1.06811	0.0153875	0.482056	MRNA, clone:SPL010099F04, expressed in spleen
Ssc.29054.3.S1_at	0.0282441	0.896876	-0.152977	0.483017	MRNA, clone:UTR010084G05, expressed in uterus
Ssc.4914.1.A1_at	0.0272625	1.25463	0.205106	0.483129	MRNA, clone:OVRM10038D01, expressed in ovary
Ssc.17461.1.A1_a_at	0.0109962	0.386896	-0.662449	0.483187	Transcribed locus
Ssc.8206.1.A1_at	0.0248504	0.902157	-0.14588	0.483626	Transcribed locus
Ssc.30752.3.S1_at	0.0186661	0.694901	-0.352185	0.483945	MRNA, clone:AMP010035E04, expressed in alveolar macrophage
Ssc.23929.1.A1_at	0.0368699	0.428266	-0.615878	0.484932	Clone Clu_315774.scr.msk.p1.Contig1, mRNA sequence
Ssc.5938.1.A1_at	0.0259342	0.389706	-0.642737	0.488882	Transcribed locus, weakly similar to XP_001088096.1 similar to syntenin isoform 3 isoform 3 [Macaca mulatta]
Ssc.14028.1.S1_at	0.0169193	1.03658	0.00468373	0.489068	MRNA, clone:THY010033D12, expressed in thymus
Ssc.1122.1.S1_at	0.0103791	0.20181	-0.828301	0.489672	MRNA, clone:OVRM10116B06, expressed in ovary
Ssc.4899.1.S1_at	0.0252248	0.475203	-0.55418	0.48992	MRNA, clone:OVR010089B11, expressed in ovary
Ssc.24452.1.S1_at	0.00487585	0.357103	-0.67211	0.489977	Transcribed locus
Ssc.86.1.S1_at	0.00266863	0.917411	-0.111584	0.490051	dehydrogenase/reductase (SDR family) member 4
Ssc.21874.1.S1_at	0.0255737	0.288547	-0.732024	0.492921	Transcribed locus
Ssc.6610.1.A1_at	0.00485435	0.523401	-0.493591	0.494146	Transcribed locus
Ssc.17203.3.S1_at	0.0127364	0.59441	-0.419893	0.495067	MRNA, clone:AMP010008A09, expressed in alveolar macrophage
Ssc.5467.1.A1_at	0.00266116	0.394804	-0.618844	0.495293	Transcribed locus
Ssc.13547.1.A1_at	0.000126836	0.736334	-0.276174	0.495684	Transcribed locus
Ssc.12677.1.S1_at	0.00123866	0.875745	-0.135982	0.495952	Transcribed locus
Ssc.4258.1.S1_at	0.00237638	0.193879	-0.817413	0.496102	Transcribed locus
Ssc.2310.1.S1_at	0.0280487	0.755363	-0.255475	0.496258	Glutathione S-transferase mu 2
Ssc.25570.1.S1_at	0.0066269	0.443444	-0.567041	0.496379	Transcribed locus
Ssc.18897.1.S1_at	0.00117718	0.650853	-0.359583	0.496396	Transcribed locus, moderately similar to XP_001089896.1 similar to CG32333-PA, isoform A isoform 1 [Macaca mulatta]
Ssc.2773.1.S1_at	0.0179717	0.587894	-0.421717	0.49668	MRNA, clone:AMP010044G02, expressed in alveolar macrophage
Ssc.30088.1.A1_at	0.00116308	0.173995	-0.835357	0.496769	Transcribed locus
Ssc.14328.1.A1_at	0.00181085	0.587608	-0.421065	0.497003	Transcribed locus
Ssc.19235.1.A1_at	0.000542427	0.787968	-0.218714	0.49769	transmembrane protein with EGF-like and two follistatin-like domains 2
Ssc.30169.1.A1_at	0.00576465	0.794807	-0.2088	0.498752	Transcribed locus, weakly similar to XP_001099842.1 similar to sterile alpha motif domain containing 9-like isoform 1 [Macaca mulatta]
Ssc.4033.2.S1_at	0.0023171	0.115859	-0.887372	0.498882	MRNA, clone:TES010047B06, expressed in testis
Ssc.20294.1.S1_at	0.00260018	0.897843	-0.103869	0.499407	MRNA, clone:OVRM10024D12, expressed in ovary
Ssc.3541.1.A1_at	0.0208975	0.451719	-0.548279	0.500001	MRNA, clone:LNG010028D10, expressed in lung
Ssc.27863.1.S1_at	0.00145606	0.961476	-0.0382664	0.500089	Transporter 1, ATP-binding cassette, sub-family B (MDR/TAP)
Ssc.1137.1.S1_at	9.15008e-06	0.379551	-0.615931	0.501568	MRNA, clone:AMP010066F01, expressed in alveolar macrophage
Ssc.5239.1.S1_at	0.0381498	1.35642	0.36529	0.503084	MRNA, clone:UTR010026D05, expressed in uterus
Ssc.21224.1.A1_at	0.0235789	0.977402	-0.00599003	0.505789	MRNA, clone:UTR010074H06, expressed in uterus
Ssc.11194.1.S1_at	0.0182052	0.93891	-0.0444269	0.505808	plasminogen activator
Ssc.18638.1.A1_at	0.00640286	0.8679	-0.114451	0.506154	Transcribed locus
Ssc.9906.2.A1_at	0.0174954	0.954837	-0.023594	0.507531	MRNA, clone:AMP010067F09, expressed in alveolar macrophage
Ssc.27318.1.S1_at	0.00889741	0.890509	-0.0799516	0.510343	MRNA, clone:UTR010074H06, expressed in uterus
Ssc.21339.1.S1_at	0.00134556	0.876726	-0.0916073	0.511096	Transcribed locus, weakly similar to XP_001107064.1 similar to tripartite motif-containing 62 isoform 1 [Macaca mulatta]
Ssc.31164.1.S1_at	0.00711027	0.901403	-0.0633868	0.512353	Transcribed locus
Ssc.20006.1.S1_at	1.12026e-05	0.962474	0.00994182	0.516725	sulfotransferase family, cytosolic, 1A, phenol-preferring, member 1
Ssc.22107.1.A1_at	0.00042699	-0.402772	0.554729	1.94194	Eukaryotic translation initiation factor 4E
Ssc.8747.2.S1_at	0.000502273	-0.305025	0.657857	1.9492	Transcribed locus, strongly similar to NP_001039930.1 protein LOC540032 [Bos taurus]
Ssc.10287.1.A1_at	0.00271128	-0.963956	0.0015769	1.95278	Transcribed locus
Ssc.12540.2.A1_at	0.00402479	-0.923534	0.0455567	1.95761	Transcribed locus, strongly similar to XP_001082386.1 similar to genetic suppressor element 1 [Macaca mulatta]
Ssc.20989.1.A1_at	0.000211299	-0.894358	0.0810967	1.96626	Transcribed locus
Ssc.15219.1.S1_at	0.000407345	-0.117969	0.861528	1.97178	selenophosphate synthetase 2
Ssc.13793.2.S1_at	0.000802417	-0.12752	0.852343	1.97228	MRNA, clone:SPL010054C11, expressed in spleen
Ssc.21011.1.S1_at	0.0434628	-1.11767	-0.132323	1.97979	MRNA, clone:OVRM10179G10, expressed in ovary
Ssc.19222.1.A1_at	0.0444814	-0.727978	0.258685	1.9816	Transcribed locus, strongly similar to XP_001111376.1 SH3-domain GRB2-like 3 [Macaca mulatta]
Ssc.24153.1.S1_at	0.027803	-0.717644	0.269478	1.98223	adenylosuccinate synthase like 1
Ssc.23519.2.S1_at	0.00309045	-0.070268	0.918833	1.98495	MRNA, clone:SPL010055E08, expressed in spleen
Ssc.15911.1.A1_at	0.000155843	-0.149054	0.841134	1.98644	NIMA (never in mitosis gene a)-related kinase 2
Ssc.7362.1.S1_at	0.0244176	-0.742328	0.248724	1.98763	Glutamyl-prolyl-tRNA synthetase
Ssc.19349.3.S1_a_at	0.000285895	-0.195536	0.796773	1.98937	Transcribed locus, weakly similar to NP_032305.2 activated protein kinase kinase kinase kinase 1 [Mus musculus]
Ssc.4122.1.S1_at	0.0463054	-0.338134	0.656101	1.99202	MRNA, clone:MLN010048A05, expressed in mesenteric lymph node
Ssc.28150.1.S1_at	0.000135597	-0.216424	0.778105	1.99243	Transcribed locus
Ssc.20832.1.S1_at	0.0237194	-0.771568	0.223031	1.99253	Transcribed locus
Ssc.28608.1.S1_at	0.00909491	-0.348072	0.647691	1.99413	Transcribed locus, moderately similar to XP_001108753.1 sperm associated antigen 5 isoform 3 [Macaca mulatta]
Ssc.13874.3.A1_at	0.00969718	-0.0796237	0.916387	1.99448	MRNA, clone:PBL010097H10, expressed in periphral blood mononuclear cell
Ssc.10942.1.S1_at	0.00303208	-0.781929	0.214829	1.99551	enolase 3 (beta, muscle)
Ssc.15875.1.S1_at	0.00324505	-0.281476	0.715282	1.99551	sorbin polypeptide
Ssc.26057.1.A1_at	0.00754258	-0.62601	0.3713	1.99627	MRNA, clone:LNG010019G07, expressed in lung
Ssc.26695.1.S1_at	0.00931277	-0.10664	0.890689	1.9963	Transcribed locus, strongly similar to XP_001092796.1 similar to N-glycanase 1 isoform 1 [Macaca mulatta]
Ssc.3781.1.A1_at	0.0334939	-0.223135	0.77557	1.99821	MRNA, clone:LVRM10050B11, expressed in liver
Ssc.28420.1.A1_at	0.00208571	-0.311646	0.687551	1.99889	Transcribed locus, strongly similar to NP_067480.1 complex subunit 5 [Mus musculus]
Ssc.30748.1.S1_at	0.00155072	-0.109436	0.890061	1.9993	Transcribed locus, moderately similar to XP_001087644.1 similar to kinesin family member 11 [Macaca mulatta]
Ssc.7190.1.S1_at	0.00544263	-0.113818	0.886636	2.00063	Transcribed locus, moderately similar to XP_342495.3 similar to budding uninhibited by benzimidazoles 1 homolog, beta [Rattus norvegicus]
Ssc.2712.1.S1_at	0.00741067	-0.44221	0.558564	2.00107	Transcribed locus
Ssc.19531.2.S1_at	0.00415204	-0.167392	0.83356	2.00132	Beta-1,3-N-acetylglucosaminyltransferase manic fringe (O-fucosylpeptide 3-beta-N-acetylglucosaminyltransferase)
Ssc.26263.1.S1_at	0.0031954	-0.13071	0.873276	2.00553
Ssc.16444.1.S1_at	0.0300088	-0.387153	0.617521	2.00649	Transcribed locus
Ssc.13112.1.S1_at	0.0138526	-0.153476	0.851725	2.00722	MRNA, clone:LVRM10095C04, expressed in liver
Ssc.924.3.A1_at	0.0394102	-0.571288	0.435046	2.0088	Transcribed locus
Ssc.23954.1.S1_at	0.0123274	-0.103853	0.902729	2.00915	Transcribed locus, weakly similar to XP_001101625.1 similar to ARG99 homolog [Macaca mulatta]
Ssc.5631.1.S1_at	0.014955	-0.802222	0.206617	2.01229	Transcribed locus, weakly similar to XP_001104857.1 erythrocyte membrane protein band 4.1-like 2 [Macaca mulatta]
Ssc.7195.1.A1_at	0.00101836	-0.162494	0.847791	2.01431	Transcribed locus, moderately similar to XP_001078727.1 similar to budding uninhibited by benzimidazoles 1 homolog [Rattus norvegicus]
Ssc.393.1.S1_at	0.00204956	-0.807361	0.203012	2.01443	transient receptor potential cation channel, subfamily C, member 3
Ssc.11067.1.S1_a_at	0.0018284	-0.634836	0.378116	2.01804	Transcribed locus
Ssc.11929.1.A1_at	0.00609743	-0.375399	0.638017	2.01868	Transcribed locus
Ssc.30068.1.A1_at	0.00147008	-0.427603	0.585868	2.01876	Transcribed locus
Ssc.18476.3.S1_at	0.00199851	-0.29161	0.722412	2.01953	Transcribed locus
Ssc.13961.2.A1_at	0.00379904	-0.143516	0.872884	2.02286	Eukaryotic translation elongation factor 1 alpha 1
Ssc.3906.2.S1_at	0.00187385	-0.0649036	0.951548	2.02294	Transcribed locus, strongly similar to XP_001085560.1 similar to citron [Macaca mulatta]
Ssc.24093.1.S1_at	0.0013873	-0.161956	0.854623	2.02312	Transcribed locus, strongly similar to XP_001105075.1 similar to nardilysin (N-arginine dibasic convertase) [Macaca mulatta]
Ssc.908.2.S1_at	0.00201495	-0.432996	0.584573	2.0245	MRNA, clone:THY010120D09, expressed in thymus
Ssc.27322.1.S1_at	0.00221781	-0.867041	0.151286	2.02557	MRNA, clone:LVRM10136H08, expressed in liver
Ssc.24364.2.S1_at	0.00256241	-0.262696	0.755662	2.02561	Transcribed locus, moderately similar to NP_065628.1 repeat domain 46 [Mus musculus]
Ssc.2936.1.S1_at	0.00233195	-0.10528	0.913088	2.02563	Transcribed locus, weakly similar to XP_001115440.1 similar to nephronophthisis 3 [Macaca mulatta]
Ssc.15865.1.A1_at	0.0015794	-0.264589	0.754007	2.02595	karyopherin alpha 3
Ssc.12491.1.A1_at	0.00474817	-0.214348	0.806982	2.02979	Transcribed locus
Ssc.15538.1.S1_at	0.0261886	-0.642757	0.380899	2.03306	Transcribed locus
Ssc.10511.1.A1_at	0.0197098	-0.277404	0.74721	2.03442	Transcribed locus, strongly similar to XP_001118937.1 similar to F-box and leucine-rich repeat protein 5 isoform 1 [Macaca mulatta]
Ssc.1407.3.S1_at	0.000131508	-0.0933444	0.931789	2.03515	Transcribed locus
Ssc.21977.2.S1_at	0.0125607	-0.324027	0.701597	2.03584	MRNA, clone:LNG010072H01, expressed in lung
Ssc.17769.2.S1_at	2.48659e-05	-0.0146297	1.01216	2.03748	Transcribed locus
Ssc.2502.1.S1_at	0.0105871	-0.779618	0.248951	2.04	Transcribed locus
Ssc.27685.1.S1_at	0.00315812	-1.1	-0.0701662	2.04178	Transcribed locus
Ssc.18938.1.A1_at	0.000545617	-1.00306	0.0273051	2.04254	Transcribed locus, weakly similar to XP_001097378.1 carboxypeptidase E [Macaca mulatta]
Ssc.16407.1.S1_at	0.000653814	-0.170485	0.860049	2.04278	Transcribed locus, weakly similar to XP_001089813.1 similar to myosin IXA [Macaca mulatta]
Ssc.2202.2.S1_at	0.00242721	-0.379847	0.651404	2.0438	MRNA, clone:OVRM10198B04, expressed in ovary
Ssc.414.1.S1_at	0.00621791	-0.377972	0.653657	2.04433	son3 protein
Ssc.9543.2.S1_at	0.000606892	-0.198336	0.835974	2.04813	Transcribed locus, moderately similar to XP_001084755.1 similar to mitochondrial ribosomal protein 63 [Macaca mulatta]
Ssc.3496.1.A1_at	0.00781168	-0.178118	0.856552	2.04864	MRNA, clone:LVRM10159A10, expressed in liver
Ssc.26444.1.A1_at	0.0182796	-0.386988	0.649683	2.05149	Transcribed locus, weakly similar to XP_001104857.1 erythrocyte membrane protein band 4.1-like 2 [Macaca mulatta]
Ssc.27325.1.S1_at	0.00421667	-0.945658	0.0916572	2.0524	Transcribed locus, moderately similar to XP_001083947.1 tetratricopeptide repeat domain 3 [Macaca mulatta]
Ssc.30127.1.A1_at	0.0065191	-0.315881	0.721478	2.05247	UDP-glucose pyrophosphorylase 2
Ssc.29141.1.A1_at	0.000206243	-0.25117	0.787286	2.05403
Ssc.30777.2.S1_a_at	0.00779717	-0.451369	0.587522	2.05465	MRNA, clone:OVR010053G05, expressed in ovary
Ssc.24646.1.A1_at	0.00413527	-0.388972	0.649995	2.05476	MRNA, clone:AMP010056G07, expressed in alveolar macrophage
Ssc.3227.1.A1_a_at	0.0173503	-0.419505	0.620783	2.05664	Transcribed locus, strongly similar to XP_001107307.1 similar to kinesin family member 20A [Macaca mulatta]
Ssc.4563.3.S1_at	0.00690858	-0.315738	0.724749	2.05692	Transcribed locus, strongly similar to XP_001115674.1 N-acetyltransferase-like protein isoform 2 [Macaca mulatta]
Ssc.15248.2.S1_at	0.0347964	-0.259231	0.781923	2.05787	MRNA, clone:LNG010075E04, expressed in lung
Ssc.8991.1.S1_at	0.00143956	-0.293585	0.748645	2.05941	Transcribed locus
Ssc.5636.1.S1_at	0.0340423	-0.925603	0.118392	2.06193	Unc-5 homolog C (C. elegans)
Ssc.21154.2.S1_at	0.00805786	-0.117954	0.926238	2.06221	MRNA, clone:OVRM10089A04, expressed in ovary
Ssc.6996.1.A1_at	0.00845018	-0.453337	0.590948	2.06234	Transcribed locus
Ssc.9215.1.A1_at	0.00575545	-0.461615	0.582929	2.06271	Transcribed locus
Ssc.25289.1.S1_at	0.00197135	-0.152338	0.893944	2.0652	MRNA, clone:OVRM10127F05, expressed in ovary
Ssc.19703.1.S1_s_at	0.00304914	-0.158148	0.889715	2.06747	Toll-like receptor 4
Ssc.2853.3.S1_at	0.000936278	-0.235078	0.813035	2.06782	MRNA, clone:THY010075G01, expressed in thymus
Ssc.25667.3.S1_at	0.0439429	-0.864342	0.184813	2.06932	Transcribed locus, strongly similar to XP_508031.2 structural maintenance of chromosomes 3 [Pan troglodytes]
Ssc.11150.1.S1_at	0.00262734	-0.213041	0.83976	2.07455	MRNA, clone:THY010115H05, expressed in thymus
Ssc.19155.2.S1_at	0.000658547	-0.309096	0.743928	2.07487	Transcribed locus, weakly similar to NP_001348.2 (Asp-Glu-Ala-His) box polypeptide 9 [Homo sapiens]
Ssc.10185.2.A1_at	0.0134395	-0.708598	0.344762	2.07536	MRNA, clone:TCH010033C01, expressed in trachea
Ssc.25585.1.S1_at	0.0223437	-0.198001	0.856932	2.07762	Transcribed locus, strongly similar to XP_001085842.1 similar to heart and neural crest derivatives expressed transcript 2 isoform 2 [Macaca mulatta]
Ssc.21589.2.A1_at	0.00135755	-0.834177	0.221088	2.0781	MRNA, clone:LVRM10028H06, expressed in liver
Ssc.7278.1.A1_at	0.0152019	-0.583369	0.471917	2.07813	Transcribed locus
Ssc.24477.1.A1_at	0.0205335	-1.14213	-0.0847977	2.08108	Transcribed locus, weakly similar to XP_001096931.1 Rho-associated, coiled-coil containing protein kinase 2 [Macaca mulatta]
Ssc.27747.1.S1_at	0.0104152	-0.916321	0.141369	2.0816	Transcribed locus, strongly similar to XP_001107861.1 similar to wingless-type MMTV integration site family, member 2B isoform WNT-2B2 isoform 3 [Macaca mulatta]
Ssc.18855.1.A1_at	0.0347961	-0.378275	0.679443	2.08164	Transcribed locus
Ssc.3180.2.S1_at	0.000448129	-0.192983	0.864789	2.08171	Transcribed locus, strongly similar to XP_001107285.1 similar to tumor protein p53 binding protein, 1 isoform 4 [Macaca mulatta]
Ssc.2777.2.S1_at	0.000393858	-0.225912	0.832377	2.08246	MRNA, clone:OVRM10018H02, expressed in ovary
Ssc.18296.2.S1_a_at	0.00204506	-0.348785	0.710078	2.08329	MRNA, clone:AMP010023C06, expressed in alveolar macrophage
Ssc.7110.1.A1_at	0.00133294	-0.0810323	0.979248	2.08534	MRNA, clone:THY010116E09, expressed in thymus
Ssc.4612.2.S1_at	0.00310281	-0.22024	0.840268	2.08567	MRNA, clone:THY010058B01, expressed in thymus
Ssc.11675.2.A1_at	0.00294007	-0.382523	0.680351	2.08909	Transcribed locus
Ssc.30613.1.A1_at	0.0211514	-0.448932	0.615088	2.09075	Transcribed locus
Ssc.4308.1.A1_at	0.0149601	-0.828968	0.237544	2.09436	Transcribed locus
Ssc.18139.1.S1_at	0.00333293	-0.631081	0.435433	2.09437	Transcribed locus
Ssc.8552.3.S1_a_at	0.0454187	-0.901718	0.166593	2.09698	alpha-1,3-galactosyltransferase
Ssc.3282.1.S1_at	0.00401411	-0.247063	0.821967	2.09802	MRNA, clone:UTR010080B01, expressed in uterus
Ssc.25040.1.S1_at	0.00957918	-0.216395	0.85444	2.10065	Transcribed locus, weakly similar to NP_006272.2 kinase 3 (STE20 homolog, yeast) [Homo sapiens]
Ssc.23847.2.S1_at	0.00388753	-0.320473	0.750593	2.10098	Transcribed locus, moderately similar to XP_001085349.1 similar to RPB5-mediating protein isoform a isoform 3 [Macaca mulatta]
Ssc.23488.1.S1_at	0.0181218	-0.177661	0.894772	2.10298	Glutathione reductase
Ssc.23851.1.A1_at	0.000588956	-0.227365	0.845295	2.10331	Anaphase-promoting complex subunit 1 (APC1) (Cyclosome subunit 1) (Protein Tsg24) (Mitotic checkpoint regulator) [Rattus norvegicus]
Ssc.15173.3.S1_at	0.0031959	-0.166609	0.906842	2.10446	Transcribed locus, weakly similar to XP_001095558.1 similar to laminin alpha 3 subunit isoform 1 isoform 3 [Macaca mulatta]
Ssc.24988.1.S1_at	0.00992546	-0.244036	0.830035	2.10537	succinate dehydrogenase complex, subunit A, flavoprotein (Fp)
Ssc.30704.3.A1_at	0.0023419	-0.825444	0.249118	2.10608	MRNA, clone:UTR010059B08, expressed in uterus
Ssc.26110.1.S1_at	0.00235778	-0.321163	0.753712	2.10654	Transcribed locus, weakly similar to XP_001116766.1 similar to K+ channel tetramerization protein [Macaca mulatta]
Ssc.24253.1.S1_at	0.0487727	-0.203497	0.872076	2.10756	Transcribed locus
Ssc.7146.1.A1_at	0.0185257	-0.113422	0.964307	2.11071	Transcribed locus, weakly similar to NP_000341.2 cassette, sub-family A member 4 [Homo sapiens]
Ssc.5455.2.S1_at	0.000585478	-0.24485	0.833477	2.11159	Transcribed locus, weakly similar to XP_001094360.1 lamin B receptor isoform 2 [Macaca mulatta]
Ssc.7985.1.S1_at	0.0139573	-0.451623	0.630097	2.11656	ATPase, Ca++ transporting, plasma membrane 1
Ssc.1703.2.A1_at	0.00168107	-0.359578	0.723314	2.11828	Transcribed locus
Ssc.2155.1.S1_at	0.0474639	-0.114421	0.968873	2.11887	DIRAS family, GTP-binding RAS-like 3
Ssc.11693.1.A1_at	0.000901942	-0.134204	0.949632	2.11966	Transcribed locus, moderately similar to XP_001114820.1 NCK adaptor protein 1 isoform 3 [Macaca mulatta]
Ssc.15875.1.A1_at	1.96611e-05	-0.262213	0.822614	2.12112	sorbin polypeptide
Ssc.16167.1.S1_at	0.0165796	-0.782003	0.303748	2.12248	Rho-associated, coiled-coil containing protein kinase 1
Ssc.24288.1.A1_at	0.01136	-0.168637	0.918146	2.124	Transcribed locus
Ssc.20685.1.S1_at	0.0186122	-0.637122	0.450677	2.1255	Transcribed locus
Ssc.5402.1.S1_at	0.00286789	-0.547859	0.542232	2.12887	Transcribed locus
Ssc.22328.3.S1_at	0.00938309	-0.336007	0.755786	2.13139	MRNA, clone:THY010064E05, expressed in thymus
Ssc.21588.2.S1_at	0.00869137	-0.448031	0.643895	2.13158	Transcribed locus, strongly similar to XP_001084279.1 similar to CG17293-PA [Macaca mulatta]
Ssc.19182.1.A1_at	4.7796e-05	-0.976551	0.115842	2.13227	Transcribed locus
Ssc.14340.3.S1_at	0.00667521	-0.37602	0.717582	2.13406	MRNA, clone:OVR010013A06, expressed in ovary
Ssc.29746.1.A1_at	0.00397188	-0.969182	0.125318	2.13539	Transcribed locus
Ssc.18988.1.S1_at	0.00315413	-0.22923	0.865773	2.13614	Transcribed locus, strongly similar to XP_001100237.1 zinc fingers and homeoboxes 1 [Macaca mulatta]
Ssc.27226.1.A1_at	0.000280903	-0.828456	0.267549	2.13762	Clone Clu_21466.scr.msk.p1.Contig3, mRNA sequence
Ssc.27888.2.S1_at	0.000884963	-0.118707	0.979612	2.14105
Ssc.18585.2.S1_at	0.0101325	-0.412173	0.686824	2.14206	MRNA, clone:LVRM10002E02, expressed in liver
Ssc.12878.1.S1_at	0.0099439	-0.303231	0.796917	2.14377	Transcribed locus, weakly similar to XP_001093777.1 similar to chromodomain helicase DNA binding protein 1-like [Macaca mulatta]
Ssc.7435.1.A1_at	0.00296992	-0.420011	0.680743	2.14467	Transcribed locus
Ssc.13252.1.A1_at	0.00221957	-0.18656	0.916318	2.14783	Transcribed locus, moderately similar to NP_068598.1 protein LOC60493 [Homo sapiens]
Ssc.2872.1.A1_at	0.00198754	-0.197263	0.905634	2.14786	Transcribed locus, weakly similar to XP_001105383.1 similar to sulfatase modifying factor 2 [Macaca mulatta]
Ssc.3850.1.S1_at	0.00543508	-0.346158	0.757078	2.14836	Transcribed locus, strongly similar to XP_001100033.1 similar to Neuronatin isoform 1 [Macaca mulatta]
Ssc.24875.2.S1_a_at	0.00184708	-0.193484	0.910053	2.14881	Transcribed locus, strongly similar to XP_001082315.1 polymerase (DNA directed), delta 3 [Macaca mulatta]
Ssc.16825.3.S1_at	0.00310908	-0.295828	0.809008	2.15074	MRNA, clone:SPL010051B03, expressed in spleen
Ssc.7565.1.A1_at	0.000609416	-0.699589	0.408381	2.15542	Transcribed locus
Ssc.22588.2.S1_at	0.00485482	-0.181299	0.926951	2.15584	MRNA, clone:LVR010101B12, expressed in liver
Ssc.13850.1.A1_at	0.00166103	-0.27261	0.837534	2.15867	MRNA, clone:LVRM10104G10, expressed in liver
Ssc.6821.1.A1_at	0.0263116	-0.536199	0.576254	2.16213	Transcribed locus
Ssc.25667.3.S1_a_at	0.0377057	-0.967394	0.145373	2.1626	Transcribed locus, strongly similar to XP_508031.2 structural maintenance of chromosomes 3 [Pan troglodytes]
Ssc.24358.1.S1_at	0.00391282	-0.400718	0.712743	2.16364	Transcribed locus, strongly similar to XP_001107944.1 thymidine kinase 1, soluble isoform 3 [Macaca mulatta]
Ssc.27454.3.S1_a_at	0.000581078	-0.325942	0.788754	2.16549	MRNA, clone:OVRM10209D07, expressed in ovary
Ssc.30857.1.S1_at	0.00167046	-0.449604	0.666403	2.16746	Transcribed locus
Ssc.5028.1.A1_at	0.0201011	-0.0212035	1.09666	2.17025	Transcribed locus, weakly similar to XP_001088306.1 cadherin 18, type 2 isoform 2 [Macaca mulatta]
Ssc.6737.2.A1_at	0.0154756	-0.939609	0.179209	2.17169	Transcribed locus
Ssc.28632.3.A1_at	0.0014146	-0.302456	0.816991	2.17264	Transcribed locus, strongly similar to XP_001098322.1 similar to O-acyltransferase (membrane bound) domain containing 1 [Macaca mulatta]
Ssc.7195.2.S1_at	0.00065655	-0.0675718	1.05356	2.17517	Transcribed locus, moderately similar to XP_001078727.1 similar to budding uninhibited by benzimidazoles 1 homolog [Rattus norvegicus]
Ssc.9048.1.A1_at	0.0106601	-0.825648	0.29563	2.1754	Transcribed locus, strongly similar to XP_001084794.1 similar to CXXC finger 5 isoform 2 [Macaca mulatta]
Ssc.29389.1.A1_at	0.00540148	-0.424347	0.696961	2.17544	Transcribed locus
Ssc.20135.1.S1_at	0.000184421	-0.08415	1.03885	2.17799	Transcribed locus
Ssc.11428.1.A1_at	0.00294154	-0.0631645	1.06135	2.18028	Transcribed locus
Ssc.13093.1.S1_at	0.00255889	-0.317446	0.807274	2.18059	MRNA, clone:OVRM10002E06, expressed in ovary
Ssc.5549.1.S1_at	0.0116992	0.202656	1.32842	2.18218	fatty acid binding protein 5
Ssc.7678.1.A1_at	0.0353528	-0.803588	0.323521	2.18421	Transcribed locus
Ssc.11559.3.S1_at	0.035246	-0.713986	0.413295	2.18447	Transcribed locus, strongly similar to XP_001115770.1 thrombospondin 3 isoform 8 [Macaca mulatta]
Ssc.7304.2.A1_at	0.0405846	-0.318455	0.809923	2.18613	Transcribed locus
Ssc.27550.1.S1_at	0.000101325	-0.232651	0.897893	2.18941	Transcribed locus, strongly similar to XP_001104885.1 ceramide glucosyltransferase [Macaca mulatta]
Ssc.7286.1.S1_at	0.000762021	-0.462632	0.668706	2.19062	cyclin-dependent kinase inhibitor 3
Ssc.16716.1.S1_at	0.010456	-0.144465	0.987385	2.1914	MRNA, clone:AMP010044G02, expressed in alveolar macrophage
Ssc.1179.1.S1_at	0.0021598	-0.930825	0.204042	2.19598	Transcribed locus
Ssc.22645.1.S1_at	0.0255697	-0.941789	0.193807	2.19709	Transcribed locus, strongly similar to XP_001106606.1 similar to 60S ribosomal protein L7 [Macaca mulatta]
Ssc.6147.2.S1_at	1.29756e-05	-0.12051	1.01618	2.19876	MRNA, clone:LNG010079D08, expressed in lung
Ssc.3364.2.S1_at	0.00795152	-0.530852	0.609027	2.20362	MRNA, clone:OVRM10031G08, expressed in ovary
Ssc.25256.1.S1_at	0.0055219	-0.280317	0.859972	2.20425	Transcribed locus
Ssc.11661.2.S1_at	0.000359692	-0.272709	0.869063	2.20652	protein phosphatase 1 catalytic subunit gamma isoform
Ssc.20017.2.S1_at	0.00167605	-0.891821	0.252996	2.21118	Transcribed locus, weakly similar to NP_062198.1 heavy polypeptide 4, skeletal muscle [Rattus norvegicus]
Ssc.14293.1.A1_at	0.0270795	-0.727744	0.417334	2.21158	Transcribed locus
Ssc.639.1.A1_at	0.00011257	-1.19077	-0.0456274	2.21168	GTP binding protein overexpressed in skeletal muscle
Ssc.21563.1.A1_at	0.0189055	-0.90311	0.242721	2.21273	Transcribed locus
Ssc.15795.1.S1_at	0.0119032	-0.317011	0.830116	2.21472	Serine hydroxymethyltransferase
Ssc.16241.1.S1_at	0.0236023	-0.36467	0.783781	2.21676	protein kinase, cAMP-dependent, regulatory, type II, alpha
Ssc.24122.1.S1_at	0.00239868	-0.187867	0.962554	2.21979	Transcribed locus, strongly similar to XP_001086615.1 similar to kinetochore associated 2 [Macaca mulatta]
Ssc.23786.2.A1_a_at	0.0038917	-0.328185	0.822978	2.22093	Transcribed locus, strongly similar to XP_001087159.1 similar to leucine rich repeat (in FLII) interacting protein 2 isoform 1 [Macaca mulatta]
Ssc.414.1.A1_at	0.00186032	-0.233939	0.919121	2.22385	son3 protein
Ssc.331.2.S1_at	0.000726385	-0.250685	0.902466	2.22399	low density lipoprotein receptor
Ssc.2456.2.A1_at	0.00020475	-0.0459997	1.10891	2.2267	Tyrosine 3-monooxygenase/tryptophan 5-monooxygenase activation protein, theta polypeptide
Ssc.13876.1.S1_at	0.000983232	-0.206504	0.948407	2.22671	Transcribed locus, strongly similar to XP_001108740.1 NIMA (never in mitosis gene a)-related kinase 2 isoform 2 [Macaca mulatta]
Ssc.16139.1.A1_at	0.0349425	-0.544639	0.613973	2.23243	Protocadherin 42-like protein
Ssc.15865.1.S1_at	0.00209006	-0.284876	0.874073	2.23295	Karyopherin alpha 3
Ssc.6988.1.A1_at	0.00296078	-0.962985	0.201395	2.24137	Transcribed locus, strongly similar to XP_001096156.1 similar to peptidylglycine alpha-amidating monooxygenase isoform b, preproprotein [Macaca mulatta]
Ssc.9075.1.A1_at	0.0405796	-0.753123	0.412664	2.24356	C-JUN protein
Ssc.7936.2.A1_at	0.00807036	-0.751534	0.41604	2.24634	Transcribed locus
Ssc.932.1.A1_at	0.00233441	-0.41292	0.754991	2.24686	Transcribed locus
Ssc.10264.1.A1_at	0.00240517	-0.314829	0.854064	2.24839	MRNA, clone:OVRM10056D11, expressed in ovary
Ssc.4552.1.S1_at	0.0360174	-0.448599	0.720807	2.24919	Low-density lipoprotein receptor
Ssc.30777.1.S1_a_at	0.00628079	-0.570765	0.602551	2.2553	MRNA, clone:OVR010053G05, expressed in ovary
Ssc.10994.1.S1_at	0.00141733	-0.184265	0.990295	2.25724	Transcribed locus, moderately similar to XP_001067212.1 similar to asp (abnormal spindle)-like, microcephaly associated [Rattus norvegicus]
Ssc.19728.1.S1_at	0.014402	-0.52447	0.650609	2.25805	TNF receptor-associated factor 5
Ssc.8970.1.S1_at	0.00649995	-0.256073	0.920808	2.26088	MRNA, clone:OVRM10205E08, expressed in ovary
Ssc.7866.1.A1_a_at	0.0187084	-0.990503	0.186837	2.2616	Transcribed locus, strongly similar to XP_001085310.1 ubiquitin specific protease 1 isoform 2 [Macaca mulatta]
Ssc.11527.2.S1_a_at	0.00035772	-0.191492	0.987156	2.26365	MRNA, clone:LVR010008H02, expressed in liver
Ssc.18714.1.A1_at	0.0485366	-0.183576	0.997942	2.26815	Transcribed locus
Ssc.12862.1.A1_at	0.0113144	-0.389722	0.792802	2.26973	Transcribed locus, weakly similar to XP_530804.1 hypothetical protein XP_530804 [Pan troglodytes]
Ssc.24671.1.S1_at	0.0407006	-0.0311968	1.153	2.27236	Transcribed locus
Ssc.29187.1.A1_at	0.0045725	-0.203453	0.982388	2.27496	Transcribed locus, strongly similar to XP_001109566.1 connexin 43 isoform 1 [Macaca mulatta]
Ssc.22797.1.S1_at	0.00687848	-0.395773	0.793502	2.28038	Transcribed locus, strongly similar to XP_001092092.1 similar to DNA topoisomerase II, beta isozyme [Macaca mulatta]
Ssc.7611.1.A1_at	0.0359801	-0.385951	0.804659	2.28249	Transcribed locus
Ssc.21350.1.S1_at	0.000781083	-0.15484	1.03643	2.28354	MRNA, clone:OVRM10086C09, expressed in ovary
Ssc.11741.2.A1_at	0.00178652	-0.131909	1.05971	2.28409	Transcribed locus, strongly similar to XP_001093380.1 similar to neuroplastin isoform b precursor [Macaca mulatta]
Ssc.27241.1.S1_at	0.000316202	-1.14505	0.0479431	2.28626	Transcribed locus, weakly similar to XP_001109824.1 synaptic Ras GTPase activating protein 1 [Macaca mulatta]
Ssc.19422.1.S1_at	0.00827589	-0.604594	0.589833	2.28854	Transcribed locus
Ssc.28471.2.S1_at	0.000503605	-0.25996	0.935039	2.28945	MRNA, clone:OVRM10213A06, expressed in ovary
Ssc.25253.1.S1_at	0.000184466	-0.121255	1.07413	2.29006	Transcribed locus
Ssc.24872.1.S1_at	0.00017498	-0.135012	1.06171	2.29218	Transcribed locus, strongly similar to XP_001088371.1 similar to paraspeckle protein 1 isoform 1 [Macaca mulatta]
Ssc.18811.1.A1_at	0.00122253	-1.07221	0.12473	2.29253	Gap junction protein, alpha 4, 37kDa
Ssc.15876.1.S1_at	0.00842332	-0.314352	0.884571	2.29568	Tuftelin
Ssc.28468.1.A1_at	0.0185682	-0.401184	0.797914	2.29596	Transcribed locus, strongly similar to XP_001102744.1 similar to PTPL1-associated RhoGAP 1 isoform 1 [Macaca mulatta]
Ssc.14340.2.S1_at	0.00158264	-0.178895	1.0212	2.29755	MRNA, clone:OVR010013A06, expressed in ovary
Ssc.3770.1.A1_at	0.001758	-0.945559	0.256409	2.30053	MRNA, clone:AMP010070F06, expressed in alveolar macrophage
Ssc.18503.1.S1_at	0.0488401	-0.561261	0.642121	2.30279	Transcribed locus
Ssc.9918.2.A1_at	0.00464824	-0.28362	0.920143	2.3034	Transcribed locus, strongly similar to XP_001111247.1 HIV-1 Rev binding protein isoform 2 [Macaca mulatta]
Ssc.9439.3.S1_at	0.00334741	-0.368215	0.835919	2.30399	Transcribed locus, weakly similar to NP_003925.1 upstream element (FUSE) binding protein 3 [Homo sapiens]
Ssc.30635.1.S1_at	7.1939e-05	-1.18089	0.0240684	2.30531	Transcribed locus
Ssc.393.1.A1_at	0.0153111	-0.661277	0.544047	2.30589	transient receptor potential cation channel, subfamily C, member 3
Ssc.11165.3.A1_at	0.00290273	-0.275219	0.930596	2.30668	Transcribed locus, strongly similar to XP_001085017.1 similar to SEC31-like 1 isoform 1 isoform 6 [Macaca mulatta]
Ssc.13485.1.A1_at	7.81551e-05	-1.18213	0.027775	2.31323	Transcribed locus
Ssc.30747.1.A1_at	0.00338153	-0.272484	0.940294	2.31783	Transcribed locus, strongly similar to XP_001098401.1 similar to archain isoform 1 [Macaca mulatta]
Ssc.4336.1.A1_at	0.0247696	-0.837481	0.378088	2.32232	Transcribed locus
Ssc.24161.1.S1_at	0.021313	-0.625075	0.590916	2.323	Transcribed locus
Ssc.11124.1.A1_at	0.00652064	-0.261779	0.956302	2.32637	MRNA, clone:THY010060H01, expressed in thymus
Ssc.5509.2.S1_at	0.0147854	-0.319979	0.898864	2.3276	Transcribed locus, weakly similar to XP_001084699.1 similar to ADP-ribosylation factor 1 [Macaca mulatta]
Ssc.27228.2.S1_at	0.0212161	-0.804645	0.41807	2.33386	Transcribed locus, strongly similar to XP_001092234.1 SEC63-like protein isoform 4 [Macaca mulatta]
Ssc.6258.1.A1_a_at	0.0450936	-0.817945	0.409921	2.3422	Transcribed locus, strongly similar to XP_001086200.1 integrin alpha chain, alpha 6 [Macaca mulatta]
Ssc.1422.2.S1_at	0.00066258	-0.187651	1.04193	2.34499	MRNA, clone:OVRM10196F03, expressed in ovary
Ssc.21325.1.S1_at	0.000812455	-0.31767	0.913158	2.34702	Transcribed locus, strongly similar to XP_001082225.1 similar to SH3-domain binding protein 4 isoform 2 [Macaca mulatta]
Ssc.25162.1.S1_at	0.00310949	-0.250417	0.98224	2.34999	Heterogeneous nuclear ribonucleoprotein A1 (Helix-destabilizing protein) (Single-strand binding protein) (hnRNP core protein A1) (HDP-1) (Topoisomerase-inhibitor suppressed)
Ssc.10997.1.S1_at	0.00399209	-0.265228	0.968668	2.35201	Transcribed locus, weakly similar to XP_001085723.1 similar to thioredoxin domain containing 5 isoform 2 isoform 1 [Macaca mulatta]
Ssc.24094.1.S1_at	0.00749602	-0.564426	0.669738	2.35245	MRNA, clone:THY010080H07, expressed in thymus
Ssc.8739.2.S1_at	0.000532723	-0.231941	1.00322	2.35408	Transcribed locus, weakly similar to NP_001066969.1 [Oryza sativa (japonica cultivar-group)]
Ssc.4381.1.S1_at	0.00929821	-0.423702	0.812723	2.35614	MRNA, clone:SPL010037A02, expressed in spleen
Ssc.5979.1.A1_at	0.00151223	-1.24206	-0.00525951	2.35675	Transcribed locus
Ssc.23976.1.S1_at	0.000458871	-0.202507	1.03759	2.36215	Transcribed locus, weakly similar to NP_061135.1 (Asp-Glu-Ala-Asp) box polypeptide 43 [Homo sapiens]
Ssc.26533.1.A1_at	0.00629749	-0.416	0.824394	2.36263	MRNA, clone:OVRM10045B06, expressed in ovary
Ssc.4058.2.S1_at	0.000755593	-0.245507	0.995133	2.36303	MRNA, clone:THY010030F10, expressed in thymus
Ssc.15717.2.S1_at	0.00211078	-0.291778	0.950304	2.3654	MRNA, clone:TCH010018B10, expressed in trachea
Ssc.30142.1.A1_at	0.0055664	-0.423297	0.819635	2.36679	Transcribed locus, weakly similar to XP_001108348.1 hypothetical protein [Macaca mulatta]
Ssc.26899.1.A1_at	0.00416911	-0.185468	1.06138	2.37322	Transcribed locus, weakly similar to XP_001092735.1 hypothetical protein [Macaca mulatta]
Ssc.15238.1.S1_at	0.00192968	-0.393285	0.854148	2.37419	Transcribed locus, strongly similar to XP_001109768.1 T-LAK cell-originated protein kinase isoform 1 [Macaca mulatta]
Ssc.27483.2.S1_at	0.000521629	-0.163713	1.0868	2.37926	MRNA, clone:SPL010056F11, expressed in spleen
Ssc.13400.2.S1_at	0.00414129	-0.805044	0.446188	2.38045	Transcribed locus, strongly similar to XP_001086973.1 similar to claudin domain containing 1 protein isoform a isoform 1 [Macaca mulatta]
Ssc.19140.1.A1_at	0.00915427	-0.0929149	1.15913	2.38178	Transcribed locus
Ssc.22033.3.S1_at	0.00125078	-0.226423	1.02614	2.38264	MRNA, clone:OVRM10166F08, expressed in ovary
Ssc.5509.1.S1_at	0.0179154	-0.600916	0.656566	2.39078	ADP-ribosylation factor-like protein 4A
Ssc.432.1.S1_at	0.00501412	-0.408111	0.850363	2.39243	baculoviral IAP repeat-containing 5 (survivin)
Ssc.27619.1.S1_at	0.00142857	-0.203817	1.05518	2.39329
Ssc.26094.2.S1_at	0.00041732	-0.27654	0.983008	2.39421	MRNA, clone:OVRM10101E07, expressed in ovary
Ssc.2070.1.S1_at	0.00188684	-1.21841	0.0413434	2.39454	Transcribed locus
Ssc.14866.1.S1_at	0.0473148	-0.323311	0.939601	2.3998	Transcribed locus
Ssc.9128.2.A1_at	0.00115267	-0.151597	1.11234	2.40151	MRNA, clone:OVR010068C12, expressed in ovary
Ssc.19966.2.S1_at	0.0184806	-0.734362	0.529932	2.4021	MRNA, clone:LVR010073A12, expressed in liver
Ssc.21407.1.S1_at	0.0154011	-0.966052	0.298752	2.40295	Transcribed locus, strongly similar to XP_001111566.1 similar to leucine zipper protein 1 [Macaca mulatta]
Ssc.8245.1.A1_at	1.19479e-05	-1.03775	0.227278	2.40331	Transcribed locus
Ssc.11992.1.A1_at	0.0304666	-0.958531	0.306644	2.40356	clusterin
Ssc.10673.1.A1_at	0.00623735	-0.985228	0.28069	2.4048	Transcribed locus
Ssc.19518.2.S1_at	0.000741647	-0.237212	1.02937	2.40591	MRNA, clone:OVR010026H04, expressed in ovary
Ssc.24827.1.A1_at	0.012016	-0.507315	0.759649	2.40655	Transcribed locus, moderately similar to XP_001088242.1 CTAGE family, member 5 [Macaca mulatta]
Ssc.5978.2.S1_a_at	4.94105e-05	-0.247937	1.02175	2.41109	MRNA, clone:OVRM10005A08, expressed in ovary
Ssc.5132.1.A1_at	0.00202908	-0.358461	0.914264	2.41618	Transcribed locus
Ssc.24353.2.S1_at	0.000181556	-0.149976	1.12379	2.41792	MRNA, clone:LNG010028H04, expressed in lung
Ssc.26858.1.A1_at	5.25563e-06	-0.17816	1.09666	2.41969	Transcribed locus
Ssc.18808.1.S1_at	0.0152427	-1.28788	-0.0112036	2.4228	Transcribed locus, weakly similar to XP_001116489.1 similar to progestin and adipoQ receptor family member VI isoform 2 [Macaca mulatta]
Ssc.22040.2.S1_at	0.0106027	-0.531257	0.748463	2.42792	Transcribed locus, weakly similar to XP_001087159.1 similar to leucine rich repeat (in FLII) interacting protein 2 isoform 1 [Macaca mulatta]
Ssc.4895.2.S1_at	0.000518489	-0.285568	0.994473	2.42846	Transcribed locus, strongly similar to XP_001094917.1 similar to F-box only protein 25 isoform 1 isoform 1 [Macaca mulatta]
Ssc.10991.3.S1_at	0.000906296	-0.22484	1.05567	2.42925	Transcribed locus, strongly similar to XP_001112776.1 similar to HLA-B associated transcript 5 [Macaca mulatta]
Ssc.3739.1.S1_at	0.00315413	-0.927188	0.353531	2.4296	Proprotein convertase subtilisin/kexin type 6 precursor (Paired basic amino acid cleaving enzyme 4) (Subtilisin/kexin-like protease PACE4) (Subtilisin-like proprotein convertase 4)
Ssc.29842.1.A1_at	0.00986605	-0.13693	1.14781	2.43639	Transcribed locus
Ssc.2224.1.S1_at	0.00126261	-0.743989	0.542276	2.43896	MRNA, clone:OVRM10201A11, expressed in ovary
Ssc.6677.1.S1_at	0.0326594	-0.944752	0.346439	2.4473	MRNA, clone:THY010207C02, expressed in thymus
Ssc.13463.1.S1_at	0.000343921	-1.18215	0.109081	2.44736	Transcribed locus
Ssc.16750.1.A1_at	0.0131871	-0.990632	0.302258	2.45018	Transcribed locus
Ssc.2642.1.S1_at	0.00341812	-0.616519	0.678221	2.45333	MRNA, clone:LVR010105H07, expressed in liver
Ssc.1532.2.A1_at	0.0143182	-0.49275	0.802303	2.45386	Transcribed locus
Ssc.22049.1.S1_at	0.0179039	-0.199692	1.09542	2.45396	Transcribed locus, moderately similar to XP_001111489.1 similar to quiescin Q6 isoform a [Macaca mulatta]
Ssc.16210.1.S1_at	0.000141233	-0.256486	1.03898	2.45456	polypyrimidine tract-binding protein
Ssc.1064.1.A1_at	0.0072102	-0.846455	0.452508	2.46052	MRNA, clone:OVR010033D05, expressed in ovary
Ssc.3779.1.S1_at	0.0151264	-0.624913	0.67796	2.4672	Transcribed locus
Ssc.23516.1.S1_at	0.000700562	-0.680416	0.623048	2.46821	MRNA, clone:THY010117F08, expressed in thymus
Ssc.1082.1.S1_at	0.000136334	-1.22666	0.0785124	2.47114	MRNA, clone:THY010119F01, expressed in thymus
Ssc.25842.1.S1_at	0.00898244	-0.602212	0.704529	2.47382	Transcribed locus, moderately similar to XP_001111197.1 ubiquitin specific protease 10 [Macaca mulatta]
Ssc.15823.1.S1_at	0.0015999	-0.244036	1.06511	2.47795	laminin, beta 1
Ssc.9451.1.S1_at	0.00319852	-1.32051	-0.0109735	2.47863	Transcribed locus
Ssc.2099.1.S1_at	0.000620999	-0.692656	0.617289	2.47932	Transcribed locus, strongly similar to XP_001086180.1 kinesin family member 23 isoform 1 [Macaca mulatta]
Ssc.12295.1.A1_at	0.0186195	-0.126214	1.18514	2.48175	MRNA, clone:AMP010090D08, expressed in alveolar macrophage
Ssc.8918.1.A1_at	0.00218841	-0.561029	0.75033	2.48175	Transcribed locus, weakly similar to NP_063916.1 factor VIII isoform b precursor [Homo sapiens]
Ssc.15956.1.S1_at	0.00705628	-0.200381	1.11138	2.48244	FAT mRNA, partial sequence
Ssc.16671.2.S1_at	0.0397218	-0.855652	0.4581	2.48587	MRNA, clone:UTR010041C05, expressed in uterus
Ssc.16221.1.S1_at	0.000365008	-0.648601	0.667465	2.48986	Gap junction protein, alpha 4, 37kDa
Ssc.25253.2.A1_at	0.00120154	-0.362603	0.95663	2.49533	Transcribed locus
Ssc.27219.1.S1_at	0.000459453	-0.329177	0.992174	2.499	Transcribed locus, strongly similar to XP_001113948.1 ubiquitin associated protein 2-like isoform 4 [Macaca mulatta]
Ssc.6633.2.A1_at	0.000612727	-0.257534	1.06454	2.50026	Transcribed locus, strongly similar to XP_001156097.1 similar to BAT2 isoform 13 [Pan troglodytes]
Ssc.4265.1.A1_a_at	0.000703664	-0.24868	1.07535	2.50364	Transcribed locus, moderately similar to XP_001101019.1 trinucleotide repeat containing 6B isoform 1 [Macaca mulatta]
Ssc.2701.1.S1_at	0.0342876	-0.796576	0.530017	2.5081	Transcribed locus
Ssc.24161.2.S1_at	0.0227158	-0.570557	0.761109	2.51693	Transcribed locus
Ssc.23818.2.S1_at	0.000206573	-0.240288	1.09452	2.52241	MRNA, clone:OVRM10195D01, expressed in ovary
Ssc.30472.1.A1_at	0.00776518	-1.0669	0.268262	2.52303	Transcribed locus
Ssc.29939.1.S1_at	0.00962598	-0.62307	0.717164	2.53192	Transcribed locus
Ssc.12803.1.S1_at	0.000251865	-0.214913	1.12847	2.53745	acyl-Coenzyme A oxidase 1, palmitoyl
Ssc.6934.3.S1_at	0.00398553	-0.431155	0.91413	2.5408	MRNA, clone:OVRM10189H07, expressed in ovary
Ssc.15876.1.A1_at	0.0118264	-0.466321	0.879852	2.54237	tuftelin
Ssc.24142.2.A1_s_at	0.000726489	-1.118	0.228781	2.54343	Transcribed locus
Ssc.26795.1.S1_at	0.0177983	-0.266574	1.08623	2.55409	Transcribed locus, moderately similar to XP_001106484.1 similar to Heterogeneous nuclear ribonucleoprotein C-like 1 (hnRNP core protein C-like 1) isoform 2 [Macaca mulatta]
Ssc.25107.1.S1_at	0.0279524	-0.601612	0.756753	2.56394	MRNA, clone:LVR010033C03, expressed in liver
Ssc.3953.1.S1_at	1.17011e-05	-1.29389	0.0685585	2.57122	Transcribed locus
Ssc.12680.1.A1_at	0.0445541	0.0848401	1.45046	2.57687	Transcribed locus
Ssc.18270.1.S1_at	0.000129765	-1.38714	-0.0167005	2.58549	Transcribed locus
Ssc.11742.2.S1_at	0.0160804	-0.381041	0.997295	2.59968	Protein-tyrosine kinase (syk)
Ssc.10391.1.A1_at	0.0316655	-1.23826	0.141346	2.60198	Transcribed locus
Ssc.27454.2.S1_at	0.0005263	-0.263325	1.12143	2.61127	MRNA, clone:OVRM10209D07, expressed in ovary
Ssc.7357.1.A1_at	8.83207e-05	-0.178209	1.20728	2.6126	Transcribed locus, weakly similar to XP_001084587.1 similar to fat3 [Macaca mulatta]
Ssc.22101.2.A1_at	0.00262608	-0.264672	1.12213	2.61498	Transcribed locus, moderately similar to XP_001098522.1 similar to methylenetetrahydrofolate dehydrogenase (NADP+ dependent) 1-like [Macaca mulatta]
Ssc.11071.2.S1_a_at	0.0116182	-0.136965	1.24995	2.61519	vinculin
Ssc.13400.1.S1_at	0.00439181	-0.493934	0.902204	2.63196	Transcribed locus, strongly similar to XP_001086973.1 similar to claudin domain containing 1 protein isoform a isoform 1 [Macaca mulatta]
Ssc.9985.1.A1_at	0.00147808	-1.45147	-0.0515653	2.63885	Transcribed locus
Ssc.26757.1.A1_at	0.00216193	-0.313975	1.09521	2.65587	Transcribed locus, strongly similar to XP_001103129.1 similar to anillin, actin binding protein (scraps homolog, Drosophila) isoform 1 [Macaca mulatta]
Ssc.19359.2.S1_at	0.0402186	-0.870292	0.541456	2.66059	MRNA, clone:SPL010098G10, expressed in spleen
Ssc.92.1.S1_at	0.0180804	-0.939674	0.477068	2.66982	transforming growth factor, beta 2
Ssc.24146.1.A1_at	0.000719228	-0.867982	0.550072	2.67225	Transcribed locus, weakly similar to XP_001100889.1 PAR-6 beta [Macaca mulatta]
Ssc.29086.2.S1_a_at	0.010152	-0.731085	0.687477	2.67319	MRNA, clone:OVRM10092B01, expressed in ovary
Ssc.13463.2.S1_at	0.00367968	-1.15474	0.266824	2.67875	Transcribed locus
Ssc.13476.1.A1_at	0.0008373	-1.26859	0.155441	2.68334	Paternally expressed 10
Ssc.2505.1.A1_at	0.000602193	-0.948005	0.476471	2.68417	MRNA, clone:OVRM10207E09, expressed in ovary
Ssc.11434.1.S1_at	0.00138684	-0.431247	0.994881	2.68725	Transcribed locus, weakly similar to XP_001107984.1 similar to HMG2 like isoform 1 [Macaca mulatta]
Ssc.4363.2.S1_at	0.00191606	-0.25111	1.17889	2.69447	Transcribed locus, weakly similar to XP_001100042.1 similar to serine/threonine protein phosphatase with EF-hand motifs 2 isoform a [Macaca mulatta]
Ssc.20319.2.S1_at	0.017198	-0.699349	0.73185	2.69671	MRNA, clone:TCH010007A09, expressed in trachea
Ssc.13385.2.S1_a_at	0.00262761	-0.728995	0.702717	2.69767	Transcribed locus
Ssc.1866.2.S1_at	0.000909363	-0.264071	1.17142	2.70474	Transcribed locus, weakly similar to XP_001084013.1 similar to filamin-binding LIM protein-1 isoform a isoform 1 [Macaca mulatta]
Ssc.1355.1.S1_at	0.00127378	-0.372747	1.06372	2.70658	Transcribed locus
Ssc.10391.2.S1_at	0.0463724	-0.960024	0.485711	2.72402	Melanoma cell adhesion molecule
Ssc.1271.1.S1_at	0.00136233	-1.27497	0.17462	2.73131	PNAS-4 protein
Ssc.4348.2.S1_at	0.00802544	-0.255231	1.19896	2.74003	MRNA, clone:THY010030E01, expressed in thymus
Ssc.26358.3.S1_at	0.00608505	-0.463538	0.991524	2.74168	MRNA, clone:THY010054G06, expressed in thymus
Ssc.14232.1.S1_at	0.00533976	-0.635634	0.821347	2.74533	MRNA, clone:THY010123F04, expressed in thymus
Ssc.5076.2.S1_at	0.000165544	-0.267805	1.20399	2.77366	MRNA, clone:OVRM10090H08, expressed in ovary
Ssc.12078.2.S1_at	0.0344507	-0.633263	0.840444	2.77735	MRNA, clone:OVRM10190A02, expressed in ovary
Ssc.27312.2.S1_at	0.00276819	-0.380701	1.09386	2.77898	MRNA, clone:OVRM10206H08, expressed in ovary
Ssc.17427.1.S1_at	0.00230866	-0.463257	1.01177	2.77988	MRNA, clone:THY010126A08, expressed in thymus
Ssc.4626.2.S1_at	0.00017181	-0.18876	1.29124	2.7895	Transcribed locus, moderately similar to XP_001056047.1 similar to RANBP4 [Rattus norvegicus]
Ssc.25087.1.S1_at	0.0113347	-0.54329	0.941792	2.79933	Transcribed locus
Ssc.15717.3.S1_at	0.000719472	-0.283816	1.20217	2.80109	MRNA, clone:TCH010018B10, expressed in trachea
Ssc.26363.2.S1_at	7.11072e-05	-0.18091	1.31008	2.81082	MRNA, clone:UTR010043H12, expressed in uterus
Ssc.22598.2.A1_a_at	0.00604363	-0.454557	1.03651	2.81097	Transcribed locus, weakly similar to XP_001088905.1 similar to zinc finger protein 326 isoform 1 isoform 1 [Macaca mulatta]
Ssc.6934.1.A1_at	2.37487e-05	-0.154681	1.33651	2.81121	MRNA, clone:OVRM10189H07, expressed in ovary
Ssc.27728.1.S1_at	0.00111247	-0.351731	1.14047	2.81319	zinc finger protein 313
Ssc.4373.1.S1_at	0.000442948	-0.256078	1.24138	2.82345	MRNA, clone:UTR010010D02, expressed in uterus
Ssc.18084.1.S1_at	0.0178953	-1.0233	0.475523	2.82612	Transcribed locus, strongly similar to XP_001088215.1 similar to J domain containing protein 1 isoform a isoform 2 [Macaca mulatta]
Ssc.28124.1.A1_at	4.64326e-05	-0.0902305	1.41023	2.82933	Aurora kinase A
Ssc.6036.2.S1_at	0.0172073	-0.757882	0.753939	2.8517	Transcribed locus
Ssc.6147.3.S1_at	0.000683788	-0.273531	1.23979	2.85466	MRNA, clone:LNG010079D08, expressed in lung
Ssc.24731.1.A1_at	0.00098033	-1.54192	-0.0219859	2.86777	Transcribed locus, weakly similar to XP_001113579.1 similar to ring finger and KH domain containing 2 [Macaca mulatta]
Ssc.25186.1.A1_at	0.00295378	-0.281592	1.24884	2.88872	Transcribed locus
Ssc.12985.1.A1_at	0.0151433	-0.433684	1.11415	2.92377	Transcribed locus
Ssc.24269.1.A1_at	0.00464206	-1.22487	0.324036	2.92594	Transcribed locus
Ssc.25144.1.S1_at	0.00987931	-0.0652095	1.48671	2.93208	Transcribed locus
Ssc.29960.1.A1_at	0.0146776	-0.989107	0.569711	2.94612	Transcribed locus
Ssc.21629.1.A1_at	0.00896252	-0.436514	1.12707	2.95587	MRNA, clone:AMP010085E05, expressed in alveolar macrophage
Ssc.11935.1.A1_at	0.00641377	-0.382325	1.18563	2.96485	Transcribed locus, strongly similar to XP_001106227.1 similar to WW domain-containing adapter with a coiled-coil region isoform 1 [Macaca mulatta]
Ssc.11165.2.S1_at	0.0061053	-0.294429	1.2736	2.96498	Transcribed locus, strongly similar to XP_001085017.1 similar to SEC31-like 1 isoform 1 isoform 6 [Macaca mulatta]
Ssc.19242.1.A1_at	0.00745978	-0.687227	0.886421	2.97657	Transcribed locus
Ssc.14326.1.A1_at	0.00167636	-0.58594	0.987933	2.97703	MRNA, clone:OVRM10218A01, expressed in ovary
Ssc.9918.1.A1_at	0.00411371	-0.23805	1.34042	2.98652	Transcribed locus, strongly similar to XP_001111247.1 HIV-1 Rev binding protein isoform 2 [Macaca mulatta]
Ssc.22101.1.S1_at	0.00208537	-0.403334	1.18907	3.01551	Transcribed locus, moderately similar to XP_001098522.1 similar to methylenetetrahydrofolate dehydrogenase (NADP+ dependent) 1-like [Macaca mulatta]
Ssc.11403.1.S1_at	0.0136011	-0.306998	1.28741	3.01971	Spectrin beta protein (pAZSP 5' end)
Ssc.17766.1.A1_at	0.0403757	-1.16113	0.433362	3.01989	Transcribed locus
Ssc.600.1.S1_s_at	0.0449728	-0.649114	0.947416	3.02415	metallothionein
Ssc.27557.1.S1_at	0.0176899	-0.602446	1.00629	3.04984	Transcribed locus
Ssc.6036.3.A1_at	0.0153415	-0.92045	0.689368	3.05213	Transcribed locus
Ssc.14467.2.S1_a_at	0.00108564	-0.631622	0.97994	3.05583	amphiregulin (schwannoma-derived growth factor)
Ssc.16341.1.S1_at	0.0137473	-0.319101	1.29315	3.05728	Prostaglandin-endoperoxide synthase 1
Ssc.16649.2.S1_at	0.000753859	-0.176572	1.43639	3.0588	MRNA, clone:ITT010042E12, expressed in intestine
Ssc.15401.1.S1_at	0.00886872	0.0167139	1.63744	3.07529	Transcribed locus, weakly similar to XP_001117884.1 similar to T-box 10 [Macaca mulatta]
Ssc.16259.1.S1_at	0.00212013	-0.447042	1.17863	3.08586	guanine nucleotide binding protein (G protein), alpha inhibiting activity polypeptide 1
Ssc.27634.1.S1_at	0.0014216	-0.453008	1.17378	3.08824	Clone Clu_26048.scr.msk.p1.Contig1, mRNA sequence
Ssc.30974.1.S1_at	0.00311452	-0.30687	1.32023	3.08892	MRNA, clone:OVRM10135C01, expressed in ovary
Ssc.5549.2.S1_at	0.00956415	0.0804543	1.70795	3.08976	Fatty acid binding protein 5
Ssc.8674.1.A1_at	0.0193662	0.0442618	1.67213	3.09055	Transcribed locus
Ssc.18558.1.S1_at	0.0389866	-0.663355	0.96723	3.09639	calcitonin receptor-stimulating peptide-2
Ssc.14470.1.S1_at	0.00207648	-0.52621	1.1086	3.10546	moesin
Ssc.27561.2.S1_at	3.64028e-05	-0.254712	1.38793	3.12236	MRNA, clone:THY010205D07, expressed in thymus
Ssc.2835.2.S1_at	0.00418054	-0.387758	1.27284	3.16147	MRNA, clone:OVRM10189A09, expressed in ovary
Ssc.1843.2.S1_at	0.000279147	-0.191885	1.47429	3.17371	MRNA, clone:OVRM10060H08, expressed in ovary
Ssc.18844.1.S1_at	0.00845134	-0.590551	1.08455	3.19342	Transcribed locus
Ssc.21462.1.S1_at	0.00222368	-0.276115	1.40098	3.19784	MRNA, clone:THY010117D02, expressed in thymus
Ssc.2921.2.A1_at	1.634e-05	-0.146384	1.53209	3.20089	Transcribed locus, moderately similar to XP_001086221.1 similar to uridine-cytidine kinase 2 isoform 1 [Macaca mulatta]
Ssc.8154.1.A1_at	0.00867155	-0.958851	0.720108	3.20197	Transcribed locus
Ssc.23877.1.S1_at	0.00010664	-0.0284012	1.65379	3.20916	MRNA, clone:THY010090D12, expressed in thymus
Ssc.10636.1.A1_at	0.0252173	-0.644708	1.04004	3.21484	Transcribed locus, moderately similar to XP_001103131.1 hypothetical protein [Macaca mulatta]
Ssc.28305.1.A1_at	0.00568229	-0.502824	1.18972	3.23225	Transcribed locus
Ssc.7399.1.A1_at	0.0145609	-0.770976	0.921598	3.23233	Transcribed locus
Ssc.28997.2.S1_at	0.0300494	-1.24114	0.453452	3.23686	Transcribed locus
Ssc.27245.2.S1_at	0.0029819	-0.496607	1.19902	3.23917	MRNA, clone:LVRM10145G12, expressed in liver
Ssc.6798.2.S1_at	0.00305161	-0.41299	1.28436	3.24304	Transcribed locus, weakly similar to XP_001083322.1 stress 70 protein chaperone, microsome-associated, 60kDa [Macaca mulatta]
Ssc.17896.2.S1_at	0.00275292	-0.846504	0.856032	3.25473	MRNA, clone:OVRM10118C05, expressed in ovary
Ssc.6689.1.S1_at	0.00162216	-0.37791	1.32471	3.25492	Transcribed locus, strongly similar to XP_001111802.1 heterogeneous nuclear ribonucleoprotein R [Macaca mulatta]
Ssc.10097.1.A1_at	0.00331152	-0.13963	1.56665	3.26317	Transcribed locus
Ssc.10430.1.A1_at	0.000555885	-1.52421	0.182694	3.26459	Transcribed locus
Ssc.19610.1.S1_at	0.0312462	-0.781538	0.929159	3.27319	MRNA, clone:SPL010069D08, expressed in spleen
Ssc.21605.1.S1_a_at	0.00605671	-0.875558	0.846169	3.29831	MRNA, clone:THY010052E09, expressed in thymus
Ssc.12176.1.S1_at	0.00214006	-0.143156	1.57999	3.30156	MRNA, clone:LVRM10066E10, expressed in liver
Ssc.5202.1.A1_at	0.00241868	-0.119018	1.60937	3.31357	Transcribed locus
Ssc.12926.1.A1_at	2.35447e-05	-1.23629	0.492125	3.31363	Transcribed locus
Ssc.23810.2.S1_at	0.00107955	-0.318453	1.41306	3.32077	MRNA, clone:OVRM10040C07, expressed in ovary
Ssc.12209.1.A1_at	0.00753956	-0.399849	1.33365	3.32534	MRNA, clone:ITT010041C02, expressed in intestine
Ssc.18011.1.S1_at	0.0245978	-0.438452	1.29669	3.32913	Transcribed locus, weakly similar to XP_001110132.1 similar to popeye protein 2 isoform 2 [Macaca mulatta]
Ssc.10168.1.A1_at	0.000655582	-1.13086	0.604998	3.33077	Transcribed locus, weakly similar to XP_001087862.1 similar to kelch-like 17 [Macaca mulatta]
Ssc.11382.1.S1_at	0.0156031	-0.674203	1.0718	3.35428	Transcribed locus, weakly similar to XP_001098677.1 tumor differentially expressed 2-like [Macaca mulatta]
Ssc.2684.1.S1_at	0.00308054	-0.397927	1.35066	3.36029	Transcribed locus
Ssc.13657.1.A1_at	0.00111649	-0.103026	1.65427	3.38065	Transcribed locus
Ssc.3615.2.S1_at	0.00671476	-0.67174	1.0883	3.38708	MRNA, clone:LNG010044C11, expressed in lung
Ssc.14374.1.A1_at	0.0318968	-1.25298	0.522616	3.42379	Transcribed locus
Ssc.26770.1.S1_at	0.000829569	-0.324068	1.46618	3.45875	MRNA, clone:THY010007A07, expressed in thymus
Ssc.12486.1.S1_at	0.0269892	-0.796073	0.995153	3.46109	MRNA, clone:ITT010086F03, expressed in intestine
Ssc.1545.2.S1_at	0.00124491	-0.432147	1.35916	3.46127	MRNA, clone:LNG010057C02, expressed in lung
Ssc.10437.1.A1_at	0.00114897	-0.938443	0.855049	3.46653	Transcribed locus, moderately similar to XP_515981.2 solute carrier family 40 (iron-regulated transporter), member 1 isoform 4 [Pan troglodytes]
Ssc.30916.1.A1_at	0.0467886	-0.829791	0.965992	3.47204	Transcribed locus
Ssc.10743.1.A1_at	0.00518048	-0.164322	1.63398	3.47811	Transcribed locus
Ssc.9101.1.A1_at	0.00248475	-1.30073	0.497706	3.47843	Transcribed locus, weakly similar to NP_001035802.1 tyrosine phosphatase, receptor type, D isoform 5 precursor [Homo sapiens]
Ssc.6550.1.A1_at	0.000462906	-0.0665577	1.74371	3.50707	MRNA, clone:OVRM10217E06, expressed in ovary
Ssc.26565.1.A1_at	0.00563412	-0.838269	0.978303	3.52243	Transcribed locus
Ssc.15233.1.S1_at	0.0119914	-0.740807	1.07704	3.52556	Transcribed locus
Ssc.6036.1.S1_at	0.0336602	-1.34887	0.473027	3.53546	Transcribed locus
Ssc.28093.1.A1_at	0.0105632	-0.749899	1.08676	3.57182	Transcribed locus, strongly similar to XP_001098763.1 similar to protein regulator of cytokinesis 1 isoform 2 [Macaca mulatta]
Ssc.7046.1.A1_at	0.0310585	-1.45823	0.379299	3.57397	Transcribed locus
Ssc.16403.1.S1_at	0.00356796	-0.553678	1.29059	3.5907	Transcribed locus, strongly similar to XP_001117509.1 similar to CG9646-PA, partial [Macaca mulatta]
Ssc.20009.1.S1_at	0.000786734	-0.134795	1.71023	3.59259	Transcribed locus
Ssc.26617.1.A1_at	0.000912636	-1.3083	0.540197	3.60125	Transcribed locus, strongly similar to XP_001097390.1 similar to paired mesoderm homeobox 1 isoform pmx-1b isoform 3 [Macaca mulatta]
Ssc.12615.1.A1_at	0.00479996	-0.316309	1.53955	3.61968	Transcribed locus
Ssc.26019.1.S1_at	0.023736	-0.310294	1.54773	3.62511	MRNA, clone:AMP010081D07, expressed in alveolar macrophage
Ssc.7435.2.A1_at	0.000972323	-0.508772	1.35139	3.63049	Transcribed locus
Ssc.15750.1.S1_a_at	0.00178546	-1.41133	0.449466	3.63208	p14ARF protein
Ssc.18336.1.S1_at	0.00104018	-0.531558	1.33373	3.64339	Transcribed locus, strongly similar to XP_001110648.1 hypothetical protein [Macaca mulatta]
Ssc.810.1.S2_at	0.0076629	-0.336849	1.53197	3.65233	Scavenger receptor class B member 2
Ssc.14379.1.A1_at	0.0129661	-1.47451	0.404044	3.67706	Transcribed locus
Ssc.10602.1.A1_at	0.0110932	-1.04026	0.839565	3.6803	Transcribed locus
Ssc.19292.2.A1_at	0.00101771	-0.182748	1.7003	3.68853	Transcribed locus, weakly similar to NP_035502.1 (alpha-N-acetyl-neuraminyl-2,3-beta-galactosyl-1,3)-N-acetylgalactosaminide alpha-2,6-sialyltransferase 3 [Mus musculus]
Ssc.3666.1.A1_at	0.000760905	-0.583365	1.3205	3.74216	Transcribed locus
Ssc.13473.1.A1_at	0.00436646	-0.4816	1.43504	3.77543	Transcribed locus
Ssc.25248.2.S1_at	0.00155658	-0.53526	1.3883	3.79358	MRNA, clone:OVRM10170H01, expressed in ovary
Ssc.3566.2.A1_at	0.0145936	-1.03914	0.88791	3.80278	Transcribed locus
Ssc.16259.1.A1_at	0.00375701	-0.570029	1.36983	3.83667	guanine nucleotide binding protein (G protein), alpha inhibiting activity polypeptide 1
Ssc.28782.2.S1_at	0.00776477	-1.15984	0.78962	3.86231	MRNA, clone:LVR010001C12, expressed in liver
Ssc.26929.1.S1_at	0.0109369	-1.77448	0.183171	3.8843	Transcribed locus
Ssc.18444.2.S1_at	0.00650269	-0.497833	1.46237	3.89116	MRNA, clone:OVRM10172D06, expressed in ovary
Ssc.5057.2.S1_at	0.00277758	-0.392636	1.57519	3.91177	MRNA, clone:UTR010008C03, expressed in uterus
Ssc.26182.2.S1_at	0.00210407	-0.439582	1.53134	3.92019	MRNA, clone:OVRM10020C02, expressed in ovary
Ssc.10386.1.S1_at	0.00538319	-0.842777	1.12995	3.9251	Transcribed locus, strongly similar to XP_001089079.1 similar to lysyl oxidase preproprotein isoform 1 [Macaca mulatta]
Ssc.1271.3.S1_at	0.0008267	-0.810867	1.16238	3.92651	PNAS-4 protein
Ssc.28997.1.S1_at	0.0022023	-1.86948	0.113623	3.95342	Transcribed locus
Ssc.6503.1.A1_at	0.0143104	-1.23443	0.755115	3.9711	Transcribed locus
Ssc.31068.1.A1_at	0.0034719	-0.962268	1.0298	3.97807	Transcribed locus
Ssc.6357.1.S1_at	0.00594814	-1.48405	0.515852	3.99972	MRNA, clone:OVRM10091C05, expressed in ovary
Ssc.29197.1.A1_at	0.0115947	-0.933284	1.07481	4.02249	Transcribed locus
Ssc.25836.1.S1_at	0.016296	-0.347951	1.66849	4.04585
Ssc.12176.3.S1_at	0.000260214	-0.251496	1.76512	4.04632	MRNA, clone:LVRM10066E10, expressed in liver
Ssc.3343.1.S1_at	0.0112338	-1.838	0.188297	4.07359	Transcribed locus
Ssc.14134.1.S1_at	9.07375e-05	-0.169729	1.86804	4.1061	Transcribed locus, weakly similar to XP_001107497.1 similar to polypeptide N-acetylgalactosaminyltransferase 2 [Macaca mulatta]
Ssc.8843.1.A1_at	0.00823907	-2.10617	-0.0680239	4.10717	Transcribed locus
Ssc.13587.1.A1_at	0.00701853	-0.462902	1.57927	4.11864	Transcribed locus
Ssc.13587.2.S1_at	0.00393097	-0.476707	1.56984	4.13117	Transcribed locus, moderately similar to NP_733924.2 3, epithelial isoform a [Mus musculus]
Ssc.12191.1.A1_at	0.0312107	-0.945664	1.11135	4.16123	90-kDa heat shock protein
Ssc.28782.1.A1_at	0.0118898	-1.67635	0.411848	4.25217	MRNA, clone:LVR010001C12, expressed in liver
Ssc.23776.1.S1_at	0.00125482	-0.351854	1.74142	4.26716	MRNA, clone:OVRM10111E11, expressed in ovary
Ssc.5453.1.A1_at	0.00681386	-1.39089	0.732313	4.35661	MRNA, clone:OVR010073H12, expressed in ovary
Ssc.30861.1.A1_at	0.0048896	-0.836523	1.29168	4.37174
Ssc.19327.1.S1_at	0.00169043	-0.315108	1.82214	4.39922	Histone H1.3-like protein
Ssc.1508.1.A1_at	0.00049052	-0.592505	1.54591	4.40277	Transcribed locus, weakly similar to NP_001035802.1 tyrosine phosphatase, receptor type, D isoform 5 precursor [Homo sapiens]
Ssc.13862.3.S1_at	0.00351426	-0.541376	1.60155	4.41656	MRNA, clone:OVRM10062D03, expressed in ovary
Ssc.4747.1.S1_at	0.000736691	-0.452686	1.69828	4.44124	follistatin
Ssc.21663.1.A1_at	0.000709972	-2.16626	-0.0121024	4.45109	Transcribed locus
Ssc.16085.1.S1_at	0.00233898	-0.515892	1.65002	4.48749	tyrosine kinase 2
Ssc.21447.1.S1_at	0.0066854	-0.627757	1.53941	4.49141	Transcribed locus, weakly similar to XP_001110256.1 glutaminyl-tRNA synthetase isoform 2 [Macaca mulatta]
Ssc.92.1.A1_at	0.00256745	-0.726413	1.44089	4.49182	transforming growth factor, beta 2
Ssc.21536.1.A1_at	4.87001e-05	-0.956605	1.24671	4.60535	Transcribed locus
Ssc.5641.1.S1_at	0.0209901	-1.66188	0.551576	4.63787	Transcribed locus
Ssc.21536.2.S1_at	3.22375e-05	-0.695705	1.51994	4.64489	Transcribed locus
Ssc.2921.3.S1_at	6.8203e-05	-0.248287	1.96904	4.65029	Transcribed locus, moderately similar to XP_001086221.1 similar to uridine-cytidine kinase 2 isoform 1 [Macaca mulatta]
Ssc.2819.1.S1_at	0.00431885	-1.9788	0.249756	4.68663	calsarcin 1
Ssc.28632.1.S1_at	0.00155498	-0.553814	1.6817	4.70931	Transcribed locus, strongly similar to XP_001098322.1 similar to O-acyltransferase (membrane bound) domain containing 1 [Macaca mulatta]
Ssc.9896.2.A1_at	1.46864e-05	-0.973885	1.2681	4.73047	Transcribed locus, weakly similar to XP_001097339.1 ST8 alpha-N-acetyl-neuraminide alpha-2,8-sialyltransferase 4 [Macaca mulatta]
Ssc.390.1.A1_at	0.010085	-0.667838	1.58753	4.77455	hypoxia-inducible factor 1, alpha subunit (basic helix-loop-helix transcription factor)
Ssc.15912.1.A1_at	0.0109482	-0.335005	1.96543	4.92607	connexin 43
Ssc.19520.1.A1_at	0.00158569	-2.07936	0.226312	4.94398	Somatostatin
Ssc.3693.1.S1_at	0.0386974	-0.508016	1.81885	5.01715	MRNA, clone:AMP010026A11, expressed in alveolar macrophage
Ssc.19304.2.S1_at	4.4497e-05	-1.10938	1.22062	5.02803	Transcribed locus
Ssc.25067.1.S1_at	0.00229456	-0.57602	1.76221	5.05683	Transcribed locus
Ssc.19304.1.A1_at	0.000434514	-2.55572	-0.160653	5.26	Transcribed locus
Ssc.17312.1.A1_at	0.0207047	-0.766166	1.67937	5.44729	MRNA, clone:SPL010052A10, expressed in spleen
Ssc.19138.1.A1_at	0.000125674	-1.29277	1.15403	5.45206	Transcribed locus
Ssc.17324.1.A1_at	0.00752676	-2.5956	-0.133731	5.50928	Transcribed locus, strongly similar to XP_001112749.1 similar to eukaryotic translation elongation factor 1 alpha 1 isoform 8 [Macaca mulatta]
Ssc.1280.1.S1_at	0.000168579	-2.34389	0.122086	5.52501	MRNA, clone:TES010049B06, expressed in testis
Ssc.4511.1.S1_at	0.00171293	-2.39913	0.10863	5.68738	MRNA, clone:LNG010029F05, expressed in lung
Ssc.17133.1.A1_at	0.000627122	-2.14833	0.37128	5.73427	Transcribed locus
Ssc.21669.1.S1_at	0.00109032	-0.419273	2.13958	5.89237	MRNA, clone:TCH010092C07, expressed in trachea
Ssc.21701.2.S1_at	0.000170373	-0.34117	2.22459	5.92067	MRNA, clone:OVRM10196G04, expressed in ovary
Ssc.23764.1.S1_at	0.00231923	-2.3805	0.191551	5.94654	Transcribed locus
Ssc.25276.2.S1_at	0.00223324	-0.634396	1.95422	6.0152	Transcribed locus, strongly similar to XP_001106777.1 similar to LAG1 longevity assurance homolog 2 isoform 1 [Macaca mulatta]
Ssc.4105.1.S1_at	0.000841333	-0.90307	1.69133	6.03939	Transcribed locus
Ssc.19138.2.S1_at	0.000277721	-1.40036	1.19526	6.04448	Transcribed locus
Ssc.8555.1.A1_at	0.000213907	-2.80981	-0.212103	6.05325	Transcribed locus
Ssc.14422.2.S1_at	0.000119548	-1.58632	1.02491	6.11022	Transcribed locus
Ssc.7565.2.S1_at	0.00114227	-1.48967	1.13582	6.17095	Transcribed locus
Ssc.7266.1.A1_at	0.0129941	-0.541695	2.11991	6.32738	Clone sus_zm34 unknown mRNA
Ssc.18836.1.A1_at	5.35013e-06	-2.64511	0.0387981	6.42595	Transcribed locus
Ssc.2237.1.A1_at	0.00129071	-1.79749	0.886995	6.42852	Transcribed locus
Ssc.924.1.A1_at	0.0033236	-0.666491	2.02914	6.47836	Transcribed locus
Ssc.17872.1.A1_at	0.00242309	-1.47068	1.25587	6.61868	Transcribed locus
Ssc.11952.1.S1_at	0.0363127	-2.03621	0.74332	6.86628	Transcribed locus, strongly similar to XP_001092306.1 hypothetical protein isoform 2 [Macaca mulatta]
Ssc.9813.1.A1_at	7.47985e-05	-2.47384	0.358048	7.12005	Transcribed locus
Ssc.14422.1.A1_at	0.00111123	-2.13635	0.713168	7.20757	Transcribed locus
Ssc.23899.1.A1_at	0.0232868	-1.46643	1.57916	8.25685	Transcribed locus
Ssc.9896.1.A1_at	0.000103678	-2.26373	0.802959	8.3785	Transcribed locus, weakly similar to XP_001097339.1 ST8 alpha-N-acetyl-neuraminide alpha-2,8-sialyltransferase 4 [Macaca mulatta]
Ssc.8348.1.A1_at	0.00128656	-0.732242	2.3533	8.4887	Transcribed locus
Ssc.11302.1.S1_at	0.00164785	-0.96539	2.12898	8.54078	MRNA, clone:OVRM10077C01, expressed in ovary
Ssc.9813.2.S1_at	0.000153625	-2.65292	0.534699	9.11108	Transcribed locus
Ssc.5587.1.A1_at	1.29006e-05	-1.64592	1.55326	9.18439	Transcribed locus
Ssc.15912.1.S1_at	0.00188826	-0.546927	2.70632	9.53507	connexin 43
Ssc.17192.2.S1_at	0.00474904	-0.900899	2.45765	10.2571	MRNA, clone:OVRM10150C01, expressed in ovary
Ssc.11302.1.S2_at	0.00162155	-1.05173	2.41866	11.0838	collagen, type III, alpha 1 (Ehlers-Danlos syndrome type IV, autosomal dominant)
Ssc.15904.1.S1_at	0.00157162	-0.834486	2.6826	11.4485	interleukin-7
Ssc.7570.2.S1_at	0.0006382	-3.74082	-0.190578	11.7147	Transcribed locus
Ssc.24720.1.S1_at	0.000357801	-0.238984	3.32952	11.8639	Transcribed locus
Ssc.24986.1.S1_at	5.3412e-05	-0.627252	3.52198	17.7437	MRNA, clone:LVR010017E04, expressed in liver
Ssc.3937.1.S1_at	0.00173623	-1.28287	3.41747	25.9983	MRNA, clone:MLN010103G11, expressed in mesenteric lymph node
Ssc.7839.1.A1_at	0.000180374	-1.85394	2.90324	27.0429	Transcribed locus
Ssc.6928.1.A1_at	0.000758721	-1.3576	3.56564	30.3419	Transcribed locus
Ssc.13915.1.S1_at	0.000686404	-1.4929	3.75635	38.0349	MRNA, clone:MLN010103G11, expressed in mesenteric lymph node
Ssc.13645.1.A1_at	0.0167498	-2.83897	2.7544	48.2806	secretogranin II
