# Supplementary material
Source: publisher figshare collection journal article supplement (https://karger.figshare.com/articles/dataset/_/5120953)
Supplement: Supplementary file 2 [file 1 › 000265563_sm_TableS2.xls]

## Sheet: P4 vs Reg
Differential changes in P4 AND Reg (fold change > 2)
Probe Set ID	p-value	[P1](normalized)	[P4](normalized)	Fold change [P4]	[Reg](normalized)	Fold change [Reg]	Unigene(Avadis)	Representative Public ID	Gene Title
Up-regulated in both P4 and Reg
Ssc.27747.1.S1_at	0.0104152	-0.916321	0.141369	2.0816	0.267933	2.27246	Ssc.27747	BE033059	wingless-type MMTV integration site family, member 2B isoform WNT-2B2 isoform 3
Ssc.5636.1.S1_at	0.0340423	-0.925603	0.118392	2.06193	0.457359	2.60803	Ssc.5636	BX923169	Unc-5 homolog C (C. elegans)
Ssc.7866.1.A1_a_at	0.0187084	-0.990503	0.186837	2.2616	0.178259	2.24819	Ssc.7866	CF793018	ubiquitin specific protease 1 isoform 2
Ssc.9101.1.A1_at	0.00248475	-1.30073	0.497706	3.47843	-0.0388613	2.39806	Ssc.9101	CK464461	tyrosine phosphatase, receptor type, D isoform 5 precursor
Ssc.10391.1.A1_at	0.0316655	-1.23826	0.141346	2.60198	0.597925	3.57066	Ssc.56883	BQ605024	cDNA clone MI-P-CP1-nzd-j-13-0-UI
Ssc.10430.1.A1_at	0.000555885	-1.52421	0.182694	3.26459	0.165383	3.22566	Ssc.36694	CK452419	3-phosphoadenosine 5-phosphosulfate synthase 2 isoform b (PAPSS2)
Ssc.10673.1.A1_at	0.00623735	-0.985228	0.28069	2.4048	0.184777	2.25013	Ssc.10673	BI404740	cDNA clone MI-P-NA-aeb-h-05-1-UM.ab1
Ssc.12926.1.A1_at	2.35447e-05	-1.23629	0.492125	3.31363	-0.0951451	2.20555	Ssc.12926	BQ604383	chromosome 5 genomic contig, alternate assembly
Ssc.13463.1.S1_at	0.000343921	-1.18215	0.109081	2.44736	0.211723	2.62783	Ssc.13463	BQ599790	clone MI-P-E6-ahn-h-01-1-UM
Ssc.13463.2.S1_at	0.00367968	-1.15474	0.266824	2.67875	0.148501	2.46782	Ssc.13463	BX668283	clone scac0027.o.01 5prim
Ssc.13485.1.A1_at	7.81551e-05	-1.18213	0.027775	2.31323	0.388059	2.96944	Ssc.13485	BQ602477	chromosome 1 genomic contig, alternate assembly
Ssc.14374.1.A1_at	0.0318968	-1.25298	0.522616	3.42379	0.521115	3.42023	Ssc.14379	BQ602053	cDNA clone MI-P-HO-ahu-c-06-1-UM
Ssc.14379.1.A1_at	0.0129661	-1.47451	0.404044	3.67706	0.645104	4.34577	Ssc.14379	BQ602079	solute carrier family 38, member 1 (SLC38A1),
Ssc.14422.1.A1_at	0.00111123	-2.13635	0.713168	7.20757	-0.40312	3.3247	Ssc.14422	CF789515	866796 MARC 4PIG Sus scrofa cDNA 3', mRNA sequence.
Ssc.14422.2.S1_at	0.000119548	-1.58632	1.02491	6.11022	-0.175897	2.65815	Ssc.14422	CN165603	MARC 4PIG Sus scrofa cDNA 3', mRNA sequence
Ssc.16750.1.A1_at	0.0131871	-0.990632	0.302258	2.45018	0.189218	2.26553	Ssc.42933	BI405041	Activated leukocyte cell adhesion molecule (ALCAM)
Ssc.17133.1.A1_at	0.000627122	-2.14833	0.37128	5.73427	0.239992	5.23548	Ssc.8555	BI400897	Inhibin beta A, transcript variant 2 (INHBA)
Ssc.17766.1.A1_at	0.0403757	-1.16113	0.433362	3.01989	-0.000341415	2.2358	Ssc.17766	CD572294	cDNA clone IMAGE:5259697
Ssc.17872.1.A1_at	0.00242309	-1.47068	1.25587	6.61868	-0.197843	2.41636	Ssc.17872	CF175649	nuclear receptor subfamily 2, group F, member 1
Ssc.18270.1.S1_at	0.000129765	-1.38714	-0.0167005	2.58549	0.593776	3.94743	Ssc.18270	CN165503	MARC 4PIG Sus scrofa cDNA 3', mRNA sequence
Ssc.18836.1.A1_at	5.35013e-06	-2.64511	0.0387981	6.42595	0.730712	10.3806	Ssc.18836	CF362842	cDNA clone IMAGE:8520576, partial cds
Ssc.19138.2.S1_at	0.000277721	-1.40036	1.19526	6.04448	-0.383639	2.02331	Ssc.19138	AU060035	Zinc finger homeobox 4 (ZFHX4)
Ssc.19182.1.A1_at	4.7796e-05	-0.976551	0.115842	2.13227	0.0379292	2.02018	Ssc.19182	CF363175	Elongation factor SIII p15 subunit (tceb1)
Ssc.19304.1.A1_at	0.000434514	-2.55572	-0.160653	5.26	0.685885	9.45844	Ssc.19304	BE032545	UoG-BovSAGE-UK2 unknown mRNA
Ssc.2070.1.S1_at	0.00188684	-1.21841	0.0413434	2.39454	1.0767	4.90789	Ssc.40045	BI403243	brain cDNA clone: QflA-18510, similar to human
Ssc.21563.1.A1_at	0.0189055	-0.90311	0.242721	2.21273	0.154552	2.08156	Ssc.21563	CF788967	erythrocyte membrane protein band 4.1-like 1 (EPB41L1),transcript variant 2
Ssc.21663.1.A1_at	0.000709972	-2.16626	-0.0121024	4.45109	0.311212	5.56921	Ssc.21663	BX915625	Endothelial lipase (LIPG) gene
Ssc.2237.1.A1_at	0.00129071	-1.79749	0.886995	6.42852	-0.385718	2.66064	Ssc.54665	CK459834	BAC RP11-81P15 (Roswell Park Cancer Institute Human BAC Library) complete sequence
Ssc.23764.1.S1_at	0.00231923	-2.3805	0.191551	5.94654	0.14628	5.76284	Ssc.23764	BG895329	BAC RP11-26M20 (Roswell Park Cancer Institute Human BAC Library) complete sequenc
Ssc.23899.1.A1_at	0.0232868	-1.46643	1.57916	8.25685	0.0780099	2.9169	Ssc.23899	CK451122	mohawk homeobox (MKX)
Ssc.24142.2.A1_s_at	0.000726489	-1.118	0.228781	2.54343	0.00302696	2.17501	Ssc.55389	CK458070	chromosome 5 clone CTD-3224K15, complete sequence
Ssc.24269.1.A1_at	0.00464206	-1.22487	0.324036	2.92594	0.317208	2.91213	Ssc.24269	CK451804	clone RP42-394P20, complete sequence
Ssc.26929.1.S1_at	0.0109369	-1.77448	0.183171	3.8843	1.13871	7.53286	Ssc.26929	CN163350	Synaptopodin 2, transcript variant 6 (SYNPO2)
Ssc.27685.1.S1_at	0.00315812	-1.1	-0.0701662	2.04178	0.598671	3.24601	Ssc.27685	CO946698	P450, family 24, subfamily A, polypeptide 1 (CYP24A1), nuclear gene encoding mitochondrial protein
Ssc.28997.1.S1_at	0.0022023	-1.86948	0.113623	3.95342	0.765699	6.21251	Ssc.49326	CA781087	phosphatidylinositol-4-phosphate 5-kinase, type I, beta (pip5k1b), mRNA
Ssc.28997.2.S1_at	0.0300494	-1.24114	0.453452	3.23686	0.45581	3.24216	Ssc.49326	CB469031	sn02_C11.f sn Sus scrofa cDNA 5', mRNA sequence.
Ssc.29746.1.A1_at	0.00397188	-0.969182	0.125318	2.13539	0.431926	2.64104	Ssc.59173	CO945222	SDCCAG33 variant protein (LOC516106)
Ssc.29960.1.A1_at	0.0146776	-0.989107	0.569711	2.94612	0.142426	2.19091	Ssc.40295	CO939564	UMC-pd20fet-016-d10 Day 20 fetus pd20fet Sus scrofa cDNA 3, mRNA sequence
Ssc.30472.1.A1_at	0.00776518	-1.0669	0.268262	2.52303	0.234287	2.46431	Ssc.59258	CO992213	special AT-rich sequence binding protein 1, transcript variant 1 (SATB1)
Ssc.30635.1.S1_at	7.1939e-05	-1.18089	0.0240684	2.30531	0.403116	2.99802	Ssc.29456	AW657601	MARC 1PIG Sus scrofa cDNA 5', mRNA sequence
Ssc.3953.1.S1_at	1.17011e-05	-1.29389	0.0685585	2.57122	-0.0715259	2.33329	Ssc.1179	BG609141	MARC 1PIG Sus scrofa cDNA 5', mRNA sequence
Ssc.4308.1.A1_at	0.0149601	-0.828968	0.237544	2.09436	0.359264	2.27873	Ssc.4308	BF713481	clone CH242-157K17 on chromosom
Ssc.4336.1.A1_at	0.0247696	-0.837481	0.378088	2.32232	0.780782	3.07005	Ssc.4336	BQ600981	clone CH242-453O7 on chromosome 18, complete sequence
Ssc.5587.1.A1_at	1.29006e-05	-1.64592	1.55326	9.18439	-0.308037	2.5278	Ssc.5587	CA779134	nidogen 1 (NID1), mRNA
Ssc.5641.1.S1_at	0.0209901	-1.66188	0.551576	4.63787	0.552946	4.64227	Ssc.24341	CO954852	ankyrin 2 isoform 2, transcript variant 11 (LOC487908), mRNA
Ssc.5979.1.A1_at	0.00151223	-1.24206	-0.00525951	2.35675	0.568885	3.50872	Ssc.5979	BF702191	Bos taurus BAC CH240-12E22 (Children's Hospital Oakland)
Ssc.6036.1.S1_at	0.0336602	-1.34887	0.473027	3.53546	-0.182176	2.24497	Ssc.6036	BF710418	clone CH242-15K4 on chromosome 7
Ssc.6503.1.A1_at	0.0143104	-1.23443	0.755115	3.9711	0.0567435	2.44726	Ssc.6503	BI185160	hypothetical LOC523131 (LOC523131), mRNA
Ssc.7046.1.A1_at	0.0310585	-1.45823	0.379299	3.57397	-0.205833	2.38237	Ssc.7046	CF792963	BAC CH240-12E22
Ssc.7565.2.S1_at	0.00114227	-1.48967	1.13582	6.17095	-0.110754	2.60073	Ssc.41197	AW414453	cDNA DKFZp781C1121 (from clone DKFZp781C1121)
Ssc.7839.1.A1_at	0.000180374	-1.85394	2.90324	27.0429	-0.498282	2.55914	Ssc.7839	BQ599567	Band 4.1-like protein 3 (4.1B) (Differentially expressed in adenocarcinoma of the lung protein 1)
Ssc.8245.1.A1_at	1.19479e-05	-1.03775	0.227278	2.40331	-0.0314255	2.00878	Ssc.8245	BX920663	cDNA clone IMAGE:3873352, partial cds
Ssc.8555.1.A1_at	0.000213907	-2.80981	-0.212103	6.05325	0.533734	10.151	Ssc.8555	CO947267	Inhibin beta A, transcript variant 2 (INHBA), mRNA
Ssc.8843.1.A1_at	0.00823907	-2.10617	-0.0680239	4.10717	1.44551	11.7263	Ssc.8843	BF708392	BAC clone RP11-566P21 from 2, complete sequence
Ssc.9451.1.S1_at	0.00319852	-1.32051	-0.0109735	2.47863	0.372993	3.23442	Ssc.9451	CN163082	Integrin, alpha V (vitronectin receptor, alpha)
Ssc.9813.1.A1_at	7.47985e-05	-2.47384	0.358048	7.12005	0.120084	6.03738	Ssc.9813	CF789069	Paired related homeobox 1 (PRRX1), transcr
Ssc.9813.2.S1_at	0.000153625	-2.65292	0.534699	9.11108	-0.180942	5.54805	Ssc.9813	BI345541	ARC 2PIG Sus scrofa cDNA 5', mRNA sequence
Ssc.9985.1.A1_at	0.00147808	-1.45147	-0.0515653	2.63885	1.01164	5.51406	Ssc.9985	BI399509	G protein-coupled receptor 158 (GPR158), mRNA
Ssc.27325.1.S1_at	0.00421667	-0.945658	0.0916572	2.0524	0.314222	2.39476	Ssc.27325	CN069708	tetratricopeptide repeat domain 3
Ssc.3343.1.S1_at	0.0112338	-1.838	0.188297	4.07359	1.80314	12.4765	Ssc.3343	CK464815	synaptopodin 2 (SYNPO2)
Ssc.27241.1.S1_at	0.000316202	-1.14505	0.0479431	2.28626	0.514414	3.15899	Ssc.27241	CN165811	synaptic Ras GTPase activating protein 1
Ssc.25667.3.S1_a_at	0.0377057	-0.967394	0.145373	2.1626	0.483451	2.73368	Ssc.57522	BX920530	structural maintenance of chromosomes 3
Ssc.25667.3.S1_at	0.0439429	-0.864342	0.184813	2.06932	0.272049	2.1983	Ssc.57522	BX920530	structural maintenance of chromosomes 3
Ssc.9896.1.A1_at	0.000103678	-2.26373	0.802959	8.3785	-0.0553683	4.62151	Ssc.9896	CF368624	ST8 alpha-N-acetyl-neuraminide alpha-2,8-sialyltransferase 4
Ssc.19520.1.A1_at	0.00158569	-2.07936	0.226312	4.94398	0.387537	5.52854	Ssc.19520	CF368589	Somatostatin
Ssc.7570.2.S1_at	0.0006382	-3.74082	-0.190578	11.7147	0.99757	26.693	Ssc.7570	CF789799	solute carrier family 1
Ssc.13645.1.A1_at	0.0167498	-2.83897	2.7544	48.2806	-0.290577	5.84982	Ssc.13645	BX676772	secretogranin II
Ssc.24731.1.A1_at	0.00098033	-1.54192	-0.0219859	2.86777	0.598773	4.40973	Ssc.24648	CK463945	ring finger and KH domain containing 2
Ssc.24477.1.A1_at	0.0205335	-1.14213	-0.0847977	2.08108	0.629942	3.41545	Ssc.24477	CK457585	Rho-associated, coiled-coil containing protein kinase 2
Ssc.18808.1.S1_at	0.0152427	-1.28788	-0.0112036	2.4228	0.147082	2.70375	Ssc.18808	CF361024	progestin and adipoQ receptor family member VI isoform 2
Ssc.1271.1.S1_at	0.00136233	-1.27497	0.17462	2.73131	0.122555	2.63449	Ssc.1271	CK465362	PNAS-4 protein
Ssc.13476.1.A1_at	0.0008373	-1.26859	0.155441	2.68334	0.183062	2.73521	Ssc.40289	CN162607	Paternally expressed 10
Ssc.26617.1.A1_at	0.000912636	-1.3083	0.540197	3.60125	-0.049404	2.39313	Ssc.26617	CN153373	paired mesoderm homeobox 1 isoform pmx-1b isoform 3
Ssc.15750.1.S1_a_at	0.00178546	-1.41133	0.449466	3.63208	-0.261172	2.21938	Ssc.15750	AJ510264.1	p14ARF protein
Ssc.1082.1.S1_at	0.000136334	-1.22666	0.0785124	2.47114	1.17232	5.27431	Ssc.11257	BX672630	MRNA, clone:THY010119F01, expressed in thymus
Ssc.1280.1.S1_at	0.000168579	-2.34389	0.122086	5.52501	0.307485	6.28266	Ssc.1280	CK456827	MRNA, clone:TES010049B06, expressed in testis
Ssc.6357.1.S1_at	0.00594814	-1.48405	0.515852	3.99972	0.319641	3.49112	Ssc.6357	CF789825	MRNA, clone:OVRM10091C05, expressed in ovary
Ssc.5453.1.A1_at	0.00681386	-1.39089	0.732313	4.35661	-0.155207	2.35494	Ssc.5453	CK465332	MRNA, clone:OVR010073H12, expressed in ovary
Ssc.13915.1.S1_at	0.000686404	-1.4929	3.75635	38.0349	-0.222972	2.41149	Ssc.55381	BX926135	stathmin-like 2 (STMN2)
Ssc.3937.1.S1_at	0.00173623	-1.28287	3.41747	25.9983	-0.280894	2.00274	Ssc.55381	CN154822	stathmin-like 2 (STMN2)
Ssc.27322.1.S1_at	0.00221781	-0.867041	0.151286	2.02557	0.224493	2.131	Ssc.32196	CK458885	clone:LVRM10136H08, expressed in liver
Ssc.28782.1.A1_at	0.0118898	-1.67635	0.411848	4.25217	0.467978	4.42087	Ssc.58597	BF710011	MI-P-AY1-nqa-d-02-0-UI.s1 MI-P-AY1
Ssc.28782.2.S1_at	0.00776477	-1.15984	0.78962	3.86231	0.0556202	2.32215	Ssc.58597	BF075585	MARC 2PIG Sus scrofa cDNA 5', mRNA sequence.
Ssc.4511.1.S1_at	0.00171293	-2.39913	0.10863	5.68738	0.642512	8.2343	Ssc.4511	BI401829	dehydrogenase/reductase (SDR family) member 3 (DHRS3)
Ssc.10391.2.S1_at	0.0463724	-0.960024	0.485711	2.72402	0.372518	2.51846	Ssc.10391	BX915975	Melanoma cell adhesion molecule
Ssc.21407.1.S1_at	0.0154011	-0.966052	0.298752	2.40295	0.48504	2.73415	Ssc.21407	CN164537	leucine zipper protein 1
Ssc.10168.1.A1_at	0.000655582	-1.13086	0.604998	3.33077	-0.0756226	2.07805	Ssc.42563	CF360067	kelch-like 17
Ssc.18084.1.S1_at	0.0178953	-1.0233	0.475523	2.82612	0.106826	2.18878	Ssc.18084	CF179746	J domain containing protein 1 isoform a isoform 2
Ssc.11952.1.S1_at	0.0363127	-2.03621	0.74332	6.86628	2.1434	18.1213	Ssc.11952	BI184742	hypothetical protein isoform 2
Ssc.639.1.A1_at	0.00011257	-1.19077	-0.0456274	2.21168	0.815985	4.01877	Ssc.639	Z80109.1	GTP binding protein overexpressed in skeletal muscle
Ssc.18811.1.A1_at	0.00122253	-1.07221	0.12473	2.29253	0.173827	2.3719	Ssc.16221	CF362480	Gap junction protein, alpha 4, 37kDa
Ssc.17324.1.A1_at	0.00752676	-2.5956	-0.133731	5.50928	0.237112	7.1241	Ssc.17324	BF712267	eukaryotic translation elongation factor 1 alpha 1 isoform 8
Ssc.5631.1.S1_at	0.014955	-0.802222	0.206617	2.01229	0.40762	2.31312	Ssc.5631	CN163176	erythrocyte membrane protein band 4.1-like 2
Ssc.11992.1.A1_at	0.0304666	-0.958531	0.306644	2.40356	0.256156	2.3209	Ssc.11992	NM_213971.1	clusterin
Ssc.18938.1.A1_at	0.000545617	-1.00306	0.0273051	2.04254	1.21234	4.64408	Ssc.18938	CF366109	carboxypeptidase E
Ssc.2819.1.S1_at	0.00431885	-1.9788	0.249756	4.68663	1.95015	15.2311	Ssc.2819	CF178743	calsarcin 1
Ssc.8552.3.S1_a_at	0.0454187	-0.901718	0.166593	2.09698	0.297416	2.29602	Ssc.8552	L36535.1	alpha-1,3-galactosyltransferase
Ssc.22645.1.S1_at	0.0255697	-0.941789	0.193807	2.19709	0.282572	2.33652	Ssc.58124	CK451118	60S ribosomal protein L7
Up-regulated in P4 BUT DOWN-REGULATED IN Reg
Ssc.11071.2.S1_a_at	0.0116182	-0.136965	1.24995	2.61519	-1.19328	0.480859	Ssc.11071	Z19540.1	vinculin
Ssc.17192.2.S1_at	0.00474904	-0.900899	2.45765	10.2571	-1.99476	0.468506	Ssc.54478	BP459191	MRNA, clone:OVRM10150C01, expressed in ovary
Ssc.15912.1.S1_at	0.00188826	-0.546927	2.70632	9.53507	-1.65754	0.463097	Ssc.15912	AJ293888.1	connexin 43
Ssc.8348.1.A1_at	0.00128656	-0.732242	2.3533	8.4887	-2.03938	0.404121	Ssc.8348	CF179895	gamma-aminobutyric acid (GABA) A receptor, alpha 4
Ssc.924.1.A1_at	0.0033236	-0.666491	2.02914	6.47836	-2.02752	0.389306	Ssc.924	CB470327	Thrombospondin 1 (LOC100057478), mRNA
Ssc.7266.1.A1_at	0.0129941	-0.541695	2.11991	6.32738	-3.45058	0.133149	Ssc.56748	CO955086	Clone sus_zm34 unknown mRNA
Ssc.25276.2.S1_at	0.00223324	-0.634396	1.95422	6.0152	-2.09093	0.364366	Ssc.53820	CK462934	LAG1 longevity assurance homolog 2 isoform 1
Ssc.21669.1.S1_at	0.00109032	-0.419273	2.13958	5.89237	-1.79367	0.385713	Ssc.54769	CF788106	acyl-Coenzyme A dehydrogenase, very long chain
Ssc.28632.1.S1_at	0.00155498	-0.553814	1.6817	4.70931	-1.97361	0.373766	Ssc.35064	BP150593	O-acyltransferase (membrane bound) domain containing 1
Ssc.13862.3.S1_at	0.00351426	-0.541376	1.60155	4.41656	-2.03622	0.35482	Ssc.13862	BP438922	MRNA, clone:OVRM10062D03, expressed in ovary
Ssc.18444.2.S1_at	0.00650269	-0.497833	1.46237	3.89116	-2.2133	0.304504	Ssc.53791	BP158015	MRNA, clone:OVRM10172D06, expressed in ovary
Ssc.3666.1.A1_at	0.000760905	-0.583365	1.3205	3.74216	-2.47287	0.2699	Ssc.3666	CK459289	chromosome 5 clone CTD-2245E22, comple
Ssc.810.1.S2_at	0.0076629	-0.336849	1.53197	3.65233	-1.671	0.396625	Ssc.8609	BP460116	Scavenger receptor class B member 2
Ssc.2684.1.S1_at	0.00308054	-0.397927	1.35066	3.36029	-1.43685	0.48669	Ssc.2684	BE233848	chromosome 10 clone RP11-79I23, complete sequence
Ssc.23810.2.S1_at	0.00107955	-0.318453	1.41306	3.32077	-1.91482	0.33071	Ssc.23810	BP146493	MRNA, clone:OVRM10040C07, expressed in ovary
Ssc.10097.1.A1_at	0.00331152	-0.13963	1.56665	3.26317	-1.27199	0.456168	Ssc.10097	BQ604567	Claudin 1 variant, clone: FCC114C08
Ssc.6798.2.S1_at	0.00305161	-0.41299	1.28436	3.24304	-1.43219	0.493389	Ssc.44322	AJ667285	heat shock 70kDa protein 9B (mortalin-2)
Ssc.27245.2.S1_at	0.0029819	-0.496607	1.19902	3.23917	-1.96399	0.361637	Ssc.27245	CN154172	MRNA, clone:LVRM10145G12, expressed in liver
Ssc.21462.1.S1_at	0.00222368	-0.276115	1.40098	3.19784	-2.21377	0.26104	Ssc.21462	CF795351	MRNA, clone:THY010117D02, expressed in thymus
Ssc.27561.2.S1_at	3.64028e-05	-0.254712	1.38793	3.12236	-1.43879	0.440106	Ssc.27561	BG895731	MRNA, clone:THY010205D07, expressed in thymus
Ssc.14470.1.S1_at	0.00207648	-0.52621	1.1086	3.10546	-2.3922	0.274334	Ssc.14470	M86450.1	moesin
Ssc.8674.1.A1_at	0.0193662	0.0442618	1.67213	3.09055	-1.91456	0.257238	Ssc.54080	CO991338	DEAD box polypeptide 17 isoform p82
Ssc.15401.1.S1_at	0.00886872	0.0167139	1.63744	3.07529	-1.81662	0.280615	Ssc.15401	CA779312	T-box 10
Ssc.14467.2.S1_a_at	0.00108564	-0.631622	0.97994	3.05583	-2.04345	0.375836	Ssc.14467	AY028311.1	amphiregulin (schwannoma-derived growth factor)
Ssc.11403.1.S1_at	0.0136011	-0.306998	1.28741	3.01971	-1.33426	0.49064	Ssc.49455	CF176298	Spectrin beta protein (pAZSP 5' end)
Ssc.9918.1.A1_at	0.00411371	-0.23805	1.34042	2.98652	-1.58627	0.392775	Ssc.9918	BI400180	HIV-1 Rev binding protein isoform 2
Ssc.11165.2.S1_at	0.0061053	-0.294429	1.2736	2.96498	-1.67832	0.383184	Ssc.11165	BP165135	SEC31-like 1
Ssc.11935.1.A1_at	0.00641377	-0.382325	1.18563	2.96485	-1.47013	0.470478	Ssc.10885	CF359560	WW domain-containing adapter with a coiled-coil region isoform 1
Ssc.25144.1.S1_at	0.00987931	-0.0652095	1.48671	2.93208	-1.67294	0.328113	Ssc.25144	CK467901	homeobox A3 (HOXA3), mRNA >gb|BC123759.1| Bos taurus similar to homeobox A3 protein, mRNA
Ssc.27728.1.S1_at	0.00111247	-0.351731	1.14047	2.81319	-1.52325	0.443955	Ssc.35087	NM_001001869.1	zinc finger protein 313
Ssc.15717.3.S1_at	0.000719472	-0.283816	1.20217	2.80109	-1.53884	0.418986	Ssc.15717	BP146765	MRNA, clone:TCH010018B10, expressed in trachea
Ssc.5076.2.S1_at	0.000165544	-0.267805	1.20399	2.77366	-1.65742	0.381667	Ssc.52039	BP163038	MRNA, clone:OVRM10090H08, expressed in ovary
Ssc.1355.1.S1_at	0.00127378	-0.372747	1.06372	2.70658	-1.96573	0.331486	Ssc.1355	BI184225	Human DNA sequence from clone RP3-327J16 on chromosome 22q12.3-13.2
Ssc.27454.2.S1_at	0.0005263	-0.263325	1.12143	2.61127	-1.29503	0.489133	Ssc.50073	BI132680	MRNA, clone:OVRM10209D07, expressed in ovary
Ssc.12803.1.S1_at	0.000251865	-0.214913	1.12847	2.53745	-1.29744	0.472202	Ssc.53828	BP447334	acyl-Coenzyme A oxidase 1, palmitoyl
Ssc.12295.1.A1_at	0.0186195	-0.126214	1.18514	2.48175	-1.54724	0.373448	Ssc.12295	CK464394	splicing factor 3b, subunit 1
Ssc.15823.1.S1_at	0.0015999	-0.244036	1.06511	2.47795	-1.45592	0.431705	Ssc.24580	CN155839	laminin, beta 1
Ssc.16210.1.S1_at	0.000141233	-0.256486	1.03898	2.45456	-1.85073	0.331196	Ssc.16210	NM_214231.1	polypyrimidine tract-binding protein
Ssc.24353.2.S1_at	0.000181556	-0.149976	1.12379	2.41792	-1.15643	0.497769	Ssc.54729	BE033210	MRNA, clone:LNG010028H04, expressed in lung
Ssc.5978.2.S1_a_at	4.94105e-05	-0.247937	1.02175	2.41109	-1.79741	0.341635	Ssc.44112	BE234947	MRNA, clone:OVRM10005A08, expressed in ovary
Ssc.26094.2.S1_at	0.00041732	-0.27654	0.983008	2.39421	-1.41741	0.453486	Ssc.26094	BP162218	MRNA, clone:OVRM10101E07, expressed in ovary
Ssc.19140.1.A1_at	0.00915427	-0.0929149	1.15913	2.38178	-2.60606	0.175173	Ssc.54128	CN161841	transforming growth factor, beta receptor II (7080kDa)
Ssc.10997.1.S1_at	0.00399209	-0.265228	0.968668	2.35201	-1.7426	0.359142	Ssc.54032	BP170588	glucose regulated protein, 58 kDa
Ssc.11165.3.A1_at	0.00290273	-0.275219	0.930596	2.30668	-1.4718	0.436309	Ssc.11165	BP165135	SEC31-like 1
Ssc.24872.1.S1_at	0.00017498	-0.135012	1.06171	2.29218	-1.28403	0.450931	Ssc.6515	CK464849	paraspeckle protein 1 isoform 1
Ssc.8970.1.S1_at	0.00649995	-0.256073	0.920808	2.26088	-1.59948	0.394089	Ssc.8970	BI401569	protein disulfide isomerase related protein
Ssc.11661.2.S1_at	0.000359692	-0.272709	0.869063	2.20652	-1.92594	0.317926	Ssc.56957	CF789895	protein phosphatase 1 catalytic subunit gamma isoform
Ssc.25256.1.S1_at	0.0055219	-0.280317	0.859972	2.20425	-1.40325	0.45916	Ssc.57368	CN070455	FCH and double SH3 domains 2
Ssc.5549.1.S1_at	0.0116992	0.202656	1.32842	2.18218	-0.957053	0.447603	Ssc.5549	CB468944	fatty acid binding protein 5
Ssc.28632.3.A1_at	0.0014146	-0.302456	0.816991	2.17264	-1.7823	0.358528	Ssc.35064	CF175851	O-acyltransferase (membrane bound) domain containing 1
Ssc.27454.3.S1_a_at	0.000581078	-0.325942	0.788754	2.16549	-2.02967	0.306991	Ssc.50073	CN160537	MRNA, clone:OVRM10209D07, expressed in ovary
Ssc.2155.1.S1_at	0.0474639	-0.114421	0.968873	2.11887	-1.12606	0.495984	Ssc.2155	CO993271	DIRAS family, GTP-binding RAS-like 3
Ssc.1703.2.A1_at	0.00168107	-0.359578	0.723314	2.11828	-2.10293	0.298676	Ssc.1703	BI183996	la related protein isoform 1, tr
Ssc.24988.1.S1_at	0.00992546	-0.244036	0.830035	2.10537	-1.58542	0.394641	Ssc.24988	CK464894	succinate dehydrogenase complex, subunit A, flavoprotein (Fp)
Ssc.23488.1.S1_at	0.0181218	-0.177661	0.894772	2.10298	-1.29996	0.459362	Ssc.23488	CB471915	Glutathione reductase
Ssc.4612.2.S1_at	0.00310281	-0.22024	0.840268	2.08567	-1.65907	0.368867	Ssc.4612	BP460170	MRNA, clone:THY010058B01, expressed in thymus
Ssc.11150.1.S1_at	0.00262734	-0.213041	0.83976	2.07455	-1.30757	0.468288	Ssc.11150	BX926145	MRNA, clone:THY010115H05, expressed in thymus
Ssc.1407.3.S1_at	0.000131508	-0.0933444	0.931789	2.03515	-1.16059	0.477229	Ssc.1407	BP141517	PALM2-AKAP2 (PALM2-AKAP2), transcript variant 2, mRNA
Ssc.12491.1.A1_at	0.00474817	-0.214348	0.806982	2.02979	-1.69375	0.358636	Ssc.12491	BI402568	homeobox B4 (HOXB4)
Ssc.908.2.S1_at	0.00201495	-0.432996	0.584573	2.0245	-2.05572	0.324722	Ssc.908	L20453	26S proteasome non-ATPase regulatory subunit 11
Downregulated in both P4 and Reg
Ssc.20294.1.S1_at	0.00260018	0.897843	-0.103869	0.499407	-0.257074	0.449092	Ssc.52467	BX675634	MRNA, clone:OVRM10024D12, expressed in ovary
Ssc.12677.1.S1_at	0.00123866	0.875745	-0.135982	0.495952	-0.205832	0.472512	Ssc.12677	CN153289	Pig DNA sequence from clone CH242-181F19 on chromosome 7, complete sequence
Ssc.86.1.S1_at	0.00266863	0.917411	-0.111584	0.490051	-0.148851	0.477555	Ssc.86	NM_214019.1	dehydrogenase/reductase (SDR family) member 4
Ssc.14028.1.S1_at	0.0169193	1.03658	0.00468373	0.489068	-0.133076	0.444528	Ssc.14028	CN163078	acyloxyacyl hydrolase (neutrophil)
Ssc.30752.3.S1_at	0.0186661	0.694901	-0.352185	0.483945	-0.513138	0.432857	Ssc.48368	CB469191	MRNA, clone:AMP010035E04, expressed in alveolar macrophage
Ssc.8206.1.A1_at	0.0248504	0.902157	-0.14588	0.483626	-0.238501	0.453553	Ssc.56632	BQ601208	ATPase, Class V, type 10A (LOC711435), mRNA
Ssc.4914.1.A1_at	0.0272625	1.25463	0.205106	0.483129	-0.38421	0.321116	Ssc.4914	BI403024	MRNA, clone:OVRM10038D01, expressed in ovary
Ssc.29054.3.S1_at	0.0282441	0.896876	-0.152977	0.483017	-0.363775	0.417356	Ssc.53745	BP435972	MRNA, clone:UTR010084G05, expressed in uterus
Ssc.5540.1.S1_at	5.27854e-06	1.06811	0.0153875	0.482056	-0.216441	0.410497	Ssc.30975	CO991880	MRNA, clone:SPL010099F04, expressed in spleen
Ssc.24627.1.A1_at	0.0118584	0.954892	-0.11448	0.476527	-0.0552495	0.496498	Ssc.24627	CK461537	Human DNA sequence from clone RP4-789D17 on chromosome
Ssc.3522.2.S1_at	2.4874e-05	1.06606	-0.0144753	0.472853	-0.137531	0.434193	Ssc.3522	CF366785	MARC 3PIG Sus scrofa cDNA 5', mRNA sequence
Ssc.12795.1.S1_at	0.00211486	0.986676	-0.0999991	0.470845	-0.26979	0.418568	Ssc.12795	BX667518	MRNA, clone:OVRM10006B08, expressed in ovary
Ssc.3828.1.S1_at	0.000941259	1.02057	-0.114889	0.455189	-0.277408	0.406695	Ssc.3828	BM189944	porcine skeletal muscle cDNA library (PoSM) Sus scrofa cDNA 3'
Ssc.10460.1.S1_at	0.0166119	1.09121	-0.0567439	0.451265	-0.16538	0.418532	Ssc.10460	BX666149	MRNA, clone:LVRM10087F11, expressed in liver
Ssc.1303.1.S1_at	0.000376767	0.957582	-0.203406	0.447206	-0.0785818	0.487622	Ssc.1303	CK455870	MRNA, clone:TCH010084D08, expressed in trachea
Ssc.27727.2.S1_a_at	0.0173669	1.06351	-0.129651	0.437345	-0.0609209	0.458684	Ssc.18510	BP173144	MRNA, clone:AMP010044G02, expressed in alveolar macrophage
Ssc.8947.1.S1_at	0.00197305	1.23147	0.0363524	0.436752	-0.331119	0.338544	Ssc.8947	BX667843	basic helix-loop-helix domain containing, class B, 2
Ssc.15479.1.S1_at	0.0460609	1.13716	-0.0650984	0.434594	0.0375969	0.466657	Ssc.15479	CK465754	MRNA, clone:LVRM10067F11, expressed in liver
Ssc.15973.1.S1_at	0.0313676	1.04919	-0.15409	0.434287	-0.0174687	0.477424	Ssc.52334	NM_214153.1	ATP-diphosphohydrolase
Ssc.10030.1.A1_at	0.0428255	1.07898	-0.125428	0.433948	-0.139898	0.429617	Ssc.10030	BI399651	MRNA, clone:TCH010055C02, expressed in trachea
Ssc.10025.1.S1_at	0.00184082	1.2793	0.0628526	0.430342	-0.598808	0.272041	Ssc.10025	BF711030	MRNA, clone:SPL010056A03, expressed in spleen
Ssc.15492.1.S1_at	0.0381326	0.992935	-0.224746	0.429973	-0.455786	0.366346	Ssc.15492	CF365029	G-protein-coupled receptor induced protein GIG2, mRNA
Ssc.883.1.S1_a_at	0.00296598	0.935834	-0.285483	0.428891	-0.5015	0.369249	Ssc.883	CK455568	MRNA, clone:TCH010087D01, expressed in trachea
Ssc.5296.1.A1_at	0.00239147	1.15288	-0.0690011	0.428723	0.0061934	0.451661	Ssc.55938	BI344188	MRNA, clone:ITT010018F09, expressed in intestine
Ssc.809.1.S1_at	0.0121743	0.927884	-0.304955	0.425479	-0.197652	0.458332	Ssc.53751	CK456242	MRNA, clone:LNG010045B12, expressed in lung
Ssc.9919.1.A1_at	0.00136621	1.21988	-0.0183162	0.423902	-0.0751498	0.407528	Ssc.9919	BI399319	MI-P-AY1-nrf-a-06-0-UI.s1 MI-P-AY1 Sus scrofa cDNA clone MI-P-AY1-nrf-a-06-0-UI 3'
Ssc.26189.1.S1_a_at	0.0211566	1.10519	-0.135959	0.423034	-0.938795	0.242492	Ssc.26189	BX923601	transporter protein 4
Ssc.10593.1.S1_at	0.00757799	1.31943	0.0750616	0.422093	-0.729907	0.241595	Ssc.10588	CB288192	MRNA, clone:AMP010024D12, expressed in alveolar macrophage
Ssc.14323.1.A1_at	0.000424552	1.12568	-0.132499	0.41807	-0.238277	0.388514	Ssc.14323	BQ601845	MRNA, clone:LNG010045C06, expressed in lung
Ssc.3517.1.S1_at	0.010526	1.21007	-0.0628377	0.413824	-0.0613505	0.414251	Ssc.54044	NM_214283.1	phospholipid transfer protein
Ssc.11074.1.S1_at	0.00206642	1.39336	0.116376	0.412656	-0.583451	0.25405	Ssc.11074	U29948.1	Complement factor D
Ssc.11073.1.S1_at	0.00788584	1.24757	-0.0340166	0.411344	-0.618918	0.274241	Ssc.11073	NM_213935.1	proteasome subunit LMP7
Ssc.12918.1.S1_at	0.00137115	1.34394	0.0616726	0.411148	-0.545474	0.269916	Ssc.12918	CA780016	MRNA, clone:OVR010005A06, expressed in ovary
Ssc.18574.1.A1_at	0.0195002	1.29108	0.00851274	0.411062	-1.00842	0.203134	Ssc.31222	BX668518	CUG triplet repeat,RNA binding protein 2
Ssc.1013.1.A1_at	0.0108977	1.0813	-0.203044	0.410557	-0.00585334	0.470689	Ssc.51886	NM_214300.1	microsomal glutathione S-transferase 1
Ssc.27027.1.S1_at	0.00910212	1.07234	-0.231783	0.404966	0.0160486	0.480865	Ssc.27027	CN165788	MARC 4PIG Sus scrofa cDNA 3', mRNA sequence
Ssc.113.1.S1_at	0.0255778	1.29589	-0.0154638	0.402943	-0.723553	0.246654	Ssc.113	M86730.1	interleukin 1, alpha
Ssc.6433.1.S1_at	6.99997e-05	1.14751	-0.165517	0.402475	0.00629934	0.453379	Ssc.56320	BX672562	zinc finger, NFX1-type containing 1 isoform 1
Ssc.29749.1.A1_at	0.00595318	1.27048	-0.0427041	0.402431	-0.640919	0.265834	Ssc.44145	CO942872	MRNA, clone:OVR010074D09, expressed in ovary
Ssc.3509.1.S1_at	0.000606644	1.44131	0.128018	0.402402	-1.31829	0.147665	Ssc.3509	BE235252	hexokinase II (LOC614107), mRNA
Ssc.7207.2.A1_at	0.000576427	1.22362	-0.0907137	0.402111	-0.207954	0.370726	Ssc.51866	CF180479	MRNA, clone:LNG010015E01, expressed in lung
Ssc.11297.1.A1_at	0.000955838	1.14384	-0.171805	0.401746	-0.073503	0.430075	Ssc.11297	BI181572	Bos taurus protein phosphatase 1K (PP2C domain containing) (PPM1K)
Ssc.10025.3.S1_at	0.0112718	1.30636	-0.00990272	0.401575	-0.386636	0.309285	Ssc.10025	BI118416	MRNA, clone:SPL010056A03, expressed in spleen
Ssc.9070.1.A1_at	0.000899294	1.50617	0.184947	0.400195	-2.20104	0.0765629	Ssc.9070	BF709307	MI-P-AY0-nah-a-11-0-UI.s1 MI-P-AY0 Sus scrofa cDNA clone MI-P-AY0-nah-a-11-0-UI 3'
Ssc.10820.1.A1_at	7.24744e-05	1.17266	-0.149022	0.400069	0.0170477	0.448876	Ssc.10820	CO942708	MRNA, clone:OVRM10005B12, expressed in ovary
Ssc.1813.1.S1_at	2.53907e-05	1.34675	0.0131143	0.396768	-0.135027	0.358048	Ssc.1813	BX925475	MRNA, clone:ITT010095H05, expressed in intestine
Ssc.17029.1.A1_at	0.006674	1.17273	-0.165152	0.3956	0.0224787	0.450546	Ssc.17029	CK456293	Transcribed locus
Ssc.8942.1.S1_at	9.81651e-05	1.23228	-0.109728	0.394471	-0.260801	0.355253	Ssc.8942	BF708805	MI-P-AY0-nac-d-06-0-UI.s1 MI-P-AY0 Sus scrofa cDNA clone MI-P-AY0-nac-d-06-0-UI 3'
Ssc.4759.1.S1_at	0.000521602	1.31154	-0.0344131	0.393394	-0.361849	0.313516	Ssc.4759	CN162368	Nuclear factor of kappa light polypeptide gene enhancer in B-cells inhibitor, alpha
Ssc.30637.1.A1_at	0.000854567	1.27809	-0.0719364	0.392286	-0.244106	0.348156	Ssc.32178	CO940830	UMC-peov1-008-d05 Oviduct from a gilt in estrus peov Sus scrofa cDNA 3'
Ssc.3706.1.S2_at	0.00429124	1.27977	-0.0742311	0.391205	-0.418511	0.308152	Ssc.17042	BI340469	Superoxide dismutase 2, mitochondrial
Ssc.19095.1.A1_at	0.0112121	1.04378	-0.315052	0.389897	-0.0672528	0.462961	Ssc.19095	CF367951	neuropilin- and tolloid-like protein 1 isoform 3 precursor
Ssc.20101.1.S1_at	0.0064315	0.970707	-0.399646	0.386797	-0.24588	0.4303	Ssc.20101	BX676643	protein LOC716339
Ssc.28517.1.S1_at	7.40028e-05	1.27413	-0.0964833	0.386726	-0.0289183	0.405269	Ssc.46277	BF444318	dual specificity phosphatase 10 isoform 4
Ssc.17894.1.A1_at	0.00713674	1.06925	-0.303884	0.386051	-0.126564	0.436539	Ssc.17894	CF175852	BAC CH250-354G15 () complete sequence
Ssc.3921.1.S1_at	0.000497973	1.14981	-0.223714	0.385946	0.0307649	0.460397	Ssc.52477	AW786219	endothelial PAS domain protein 1
Ssc.29458.1.A1_at	0.0256079	1.14681	-0.238251	0.382873	-0.00637388	0.449631	Ssc.40700	CO956431	protein tyrosine phosphatase
Ssc.7275.2.A1_at	0.000136193	1.04239	-0.343676	0.382607	0.0102115	0.488971	Ssc.7275	BQ598449	MRNA, clone:AMP010054C01, expressed in alveolar macrophage
Ssc.30956.1.A1_s_at	0.00280428	1.44999	0.0551674	0.380293	-0.0891771	0.344085	Ssc.53693///Ssc.54012	CO956800	clone:OVRM10015A02, expressed in ovary
Ssc.3983.1.S1_at	0.0125623	1.37558	-0.0217063	0.379644	-1.52103	0.134287	Ssc.3983	CF360285	CUG triplet repeat RNA binding protein 2 gene, exon 16
Ssc.2464.1.S1_at	0.00830036	1.47699	0.0552738	0.373268	-0.913676	0.190694	Ssc.15105	BI400766	MRNA, clone:OVR010002A02, expressed in ovary
Ssc.19494.1.S1_at	3.05321e-05	1.41464	-0.00908065	0.37275	-0.203578	0.325738	Ssc.19494	CN164909	interferon regulatory factor 1
Ssc.12286.2.A1_at	4.62668e-06	1.10605	-0.320864	0.371925	0.065787	0.486238	Ssc.12286	BX926965	leukemia protein
Ssc.14415.1.A1_at	0.010901	1.25327	-0.174644	0.371667	-0.371933	0.324163	Ssc.14415	BQ602223	deltex 3-like, transcript variant 2 (LOC714914), mRNA
Ssc.13777.1.S1_at	0.000442124	1.26183	-0.167327	0.371348	-0.162053	0.372708	Ssc.13777	AB032169.1	SLA-DM alpha chain
Ssc.6462.1.A1_at	0.00813221	1.09382	-0.342665	0.369465	-0.248101	0.394494	Ssc.6462	CK465104	phosphatidic acid phosphatase type 2B (LOC479557), mRNA
Ssc.5085.1.A1_at	0.00141024	1.40392	-0.0347654	0.368904	-0.552834	0.257608	Ssc.5085	CN069694	Tumor necrosis factor, alpha-induced protein 3, transcript variant 4 (TNFAIP3), mRNA
Ssc.17353.1.S1_at	0.0408338	1.14059	-0.298821	0.368718	-0.412234	0.340843	Ssc.17353	CK459510	serine, 7 (enterokinase) isoform 2
Ssc.18072.1.A1_at	0.0026835	1.30632	-0.146011	0.365431	-0.472703	0.291381	Ssc.18072	CF179648	MARC 3PIG Sus scrofa cDNA 3', mRNA sequence
Ssc.3139.1.A1_at	0.000357179	1.38331	-0.0707662	0.364988	-0.157853	0.343608	Ssc.49517	CK456262	Regulator of G-protein signalling 2, 24kDa
Ssc.12504.1.A1_at	0.00127655	1.20777	-0.252643	0.363389	-0.274355	0.357961	Ssc.12504	CK465051	MRNA, clone:UTR010100D09, expressed in uterus
Ssc.12918.2.A1_at	0.00929241	1.38476	-0.0812379	0.361984	-0.430301	0.284192	Ssc.12918	BI404187	MRNA, clone:OVR010005A06, expressed in ovary
Ssc.12446.1.A1_at	0.000977704	1.2767	-0.197054	0.360044	-0.611424	0.270158	Ssc.13053	BI402345	MRNA, clone:AMP010099D07, expressed in alveolar macrophage
Ssc.7558.1.A1_at	0.00231416	1.32665	-0.162495	0.356223	-0.236564	0.338396	Ssc.56555	BQ599267	Pig DNA sequence from clone CH242-513L1 on chromosome 9, complete sequence
Ssc.12286.1.A1_at	0.0185367	1.39723	-0.100055	0.35422	-0.105865	0.352797	Ssc.12286	BI184463	leukemia protein
Ssc.10588.1.A1_at	0.00723532	1.00783	-0.499723	0.351708	-0.246597	0.41916	Ssc.10588	BX921052	MRNA, clone:AMP010024D12, expressed in alveolar macrophage
Ssc.11779.1.S1_at	0.0125496	1.18517	-0.333256	0.349067	-0.00569661	0.43804	Ssc.11779	BI180978	secreted folate binding protein
Ssc.29301.1.A1_at	5.54742e-06	1.46339	-0.0553293	0.348997	-0.271447	0.300444	Ssc.40849	CO953589	similar to XP_001104481.1 hypothetical protein
Ssc.12758.1.A1_at	6.59625e-05	1.50569	-0.0284939	0.345275	-0.431803	0.26107	Ssc.12758	CO945565	Proteasome beta 9 subunit
Ssc.220.1.A1_at	0.000869537	1.4575	-0.0797104	0.344551	-0.181588	0.32106	Ssc.37503	M65088.1	myxovirus (influenza virus) resistance 2 (mouse)
Ssc.6191.1.S1_at	0.000475456	1.44404	-0.100938	0.342701	-0.344295	0.289506	Ssc.6191	BI181481	deltex 3-like isoform 3
Ssc.336.1.S1_at	0.00559949	1.37553	-0.182176	0.33969	-1.19835	0.167952	Ssc.336	NM_213826.1	ubiquitin-specific protease
Ssc.11163.1.S1_at	2.73366e-05	1.41021	-0.147586	0.339669	0.100727	0.403465	Ssc.11163	BI403478	MRNA, clone:LVRM10150F09, expressed in liver
Ssc.24509.1.A1_at	0.00133429	1.73861	0.177356	0.338856	-0.844797	0.166846	Ssc.24509	CO938608	chromosome 5 clone CTC-455F18, complete
Ssc.12720.1.S1_at	0.000137341	1.56704	-0.00523675	0.336276	-0.125641	0.309351	Ssc.55963	CK456763	MARC 4PIG Sus scrofa cDNA 3', mRNA sequence
Ssc.30752.2.A1_at	0.0331453	0.924759	-0.662208	0.332871	-0.258378	0.440393	Ssc.48368	BI119523	MRNA, clone:AMP010035E04, expressed in alveolar macrophage
Ssc.221.1.S1_at	0.00298615	1.34281	-0.255872	0.330178	-0.476259	0.283403	Ssc.221	NM_214061.1	myxovirus (influenza virus) resistance 1, interferon-inducible protein p78
Ssc.13068.1.A1_at	4.46311e-05	1.492	-0.108265	0.329817	-0.0518799	0.342963	Ssc.13068	CF365867	poly (ADP-ribose) polymerase family, member 15
Ssc.23834.1.S1_at	0.000135786	1.50216	-0.100713	0.32922	0.00454021	0.354137	Ssc.54877	CK451290	sushi domain containing 3
Ssc.113.1.S2_at	0.0347389	1.18108	-0.43282	0.326715	-0.160138	0.394688	Ssc.113	NM_214029.1	interleukin 1, alpha
Ssc.5663.1.S1_at	0.000309043	1.33305	-0.28476	0.32583	-0.0989924	0.370606	Ssc.5663	BI185576	Versican V0 splice-variant (LOC786374), mRNA
Ssc.6233.1.S1_at	0.00649638	1.26072	-0.376783	0.321412	-0.323727	0.333452	Ssc.55663	BQ604569	MRNA, clone:LNG010078D01, expressed in lung
Ssc.8169.1.A1_at	0.0205739	1.7362	0.0942794	0.32043	-0.728512	0.181154	Ssc.56490	BI399193	Pongo abelii mRNA; cDNA DKFZp459P1036 (from clone DKFZp459P1036)
Ssc.3706.1.S1_at	0.000560583	1.75843	0.115205	0.320141	-0.897993	0.158613	Ssc.17042	NM_214127.1	Superoxide dismutase 2, mitochondrial
Ssc.11557.1.A1_at	0.00333037	1.29619	-0.358741	0.317553	-0.111341	0.376956	Ssc.11557	BI183574	interferon, alpha-inducible protein (clone IFI-15K)
Ssc.26300.2.S1_at	0.000518832	1.20507	-0.454911	0.316443	-0.0713585	0.412816	Ssc.26300	BX918761	unc-93 homolog B1 isoform 3
Ssc.30869.1.S1_at	8.71497e-05	1.34298	-0.317305	0.316378	0.0891126	0.419324	Ssc.47693	BX672895	MRNA, clone:OVR010083E07, expressed in ovary
Ssc.19224.1.S1_at	0.00567291	1.53185	-0.136308	0.314655	-0.441606	0.254643	Ssc.19224	CF368133	MARC 3PIG Sus scrofa cDNA 3', mRNA sequence
Ssc.28673.1.S1_at	0.0236252	1.23425	-0.44064	0.31319	0.0188293	0.430647	Ssc.54404	AW414891	chemokine (C-X-C motif) receptor 7 (CXCR7), mRNA for G protein-coupled receptor
Ssc.13226.1.A1_at	0.00171378	1.5523	-0.143992	0.308577	-0.386249	0.260878	Ssc.13226	BQ604865	B aggressive lymphoma gene isoform 2
Ssc.2641.1.S1_at	0.00395603	1.68683	-0.0151529	0.307363	-0.234993	0.26392	Ssc.54108	AW313822	MRNA, clone:UTR010026A05, expressed in uterus
Ssc.9039.1.A1_at	0.00142025	1.43728	-0.310314	0.297798	-0.00118566	0.36896	Ssc.9039	CF366256	chromosome 3 clone RP11-204J18, complete sequence
Ssc.17861.1.A1_at	0.00168236	1.29744	-0.455363	0.296725	0.0806964	0.430254	Ssc.34955	BI118294	MRNA, clone:AMP010022C06, expressed in alveolar macrophage
Ssc.7864.1.A1_at	0.000156349	1.26988	-0.495389	0.294172	0.0595174	0.432161	Ssc.7864	CN069777	MARC 3PIG Sus scrofa cDNA 3', mRNA sequence
Ssc.1674.1.A1_at	0.000236892	1.45743	-0.320233	0.291656	-0.0524775	0.351134	Ssc.54370	CN156808	MRNA, clone:AMP010002E09, expressed in alveolar macrophage
Ssc.18038.1.A1_at	0.00681311	1.43562	-0.345781	0.2909	-0.908331	0.19697	Ssc.57076	CF180654	Mitogen-activated protein kinase kinase kinase
Ssc.14073.1.S1_at	0.0322596	1.66956	-0.129953	0.287272	-0.00131726	0.314063	Ssc.54176	CN159960	MRNA, clone:LVRM10122H12, expressed in liver
Ssc.9039.2.S1_at	0.00132496	1.47111	-0.335584	0.285844	-0.22525	0.308563	Ssc.9039	CF364838	chromosome 3 clone RP11-204J18, complet
Ssc.21872.1.S1_at	1.38767e-06	1.73414	-0.0923691	0.281947	0.00533327	0.301702	Ssc.21872	CK463173	small trans-membrane and glycosylated protein
Ssc.30752.1.S1_at	0.0055556	1.37692	-0.450936	0.281684	-0.784853	0.223482	Ssc.48368	BX921277	MRNA, clone:AMP010035E04, expressed in alveolar macrophage
Ssc.24282.1.S1_at	0.0010679	1.78334	-0.0611122	0.278462	-1.12217	0.133461	Ssc.55941	Chemokine (C-X-C motif) ligand 2
Ssc.21.1.S1_s_at	0.00656262	1.74066	-0.110206	0.277227	-1.21089	0.129269	Ssc.15885	AF319661.1	RNA helicase
Ssc.8861.1.A1_at	0.00255852	1.45276	-0.429775	0.271206	-0.128502	0.334189	Ssc.8861	CO993157	differentiated embryo chondrocyte expressed gene 1 (LOC100059809), mRNA
Ssc.31140.1.S1_at	0.00159914	1.47486	-0.419379	0.269015	-0.131711	0.328377	Ssc.45495	BX922784	MRNA, clone:AMP010047A02, expressed in alveolar macrophage
Ssc.28465.1.S1_at	0.00234934	1.65385	-0.247007	0.267784	-0.125719	0.29127	Ssc.43830	CK464548	phosphoglucomutase 5
Ssc.12966.1.S1_at	0.00345173	1.24566	-0.657304	0.267394	0.0791451	0.445497	Ssc.12966	CN160360	LIM domain only 2 (rhombotin-like 1) isoform 1
Ssc.29079.1.A1_at	0.00217558	1.5671	-0.360987	0.262778	0.0987477	0.361395	Ssc.41525	CO993049	UMC-pd6end2-010-f01 Endometrium gilt D6 of estrous cycle pd6end Sus scrofa cDNA 3'
Ssc.9683.1.A1_at	0.0231607	1.25661	-0.674827	0.262167	-0.271388	0.346757	Ssc.9683	CF363445	Pig DNA sequence from clone CH242-238N13 on chromosome 6, complete sequence
Ssc.26631.1.A1_at	0.00287396	1.66683	-0.265879	0.261937	-0.173041	0.279346	Ssc.26631	CN153524	pleckstrin homology domain containing, family A member 7
SscAffx.1.1.S1_at	0.00137533	1.75824	-0.188286	0.25944	-0.0419466	0.287137	Ssc.42771	NM_001005351.1	interferon stimulated exonuclease gene 20kDa
Ssc.30532.1.A1_at	0.000246234	1.62854	-0.360631	0.251884	0.131221	0.354211	Ssc.34955	CO993367	MRNA, clone:AMP010022C06, expressed in alveolar macrophage
Ssc.16151.1.S1_at	0.00573396	1.82271	-0.169448	0.251363	0.0390975	0.290455	Ssc.16151	NM_213842.1	granulocyte colony-stimulating factor
Ssc.27703.1.S1_at	0.00469729	1.50102	-0.502969	0.249309	0.237179	0.416433	Ssc.54739	AW786568	fibrillin 2 (LOC540017), mRNA
Ssc.11102.1.S1_at	0.0153073	1.2951	-0.729022	0.245855	0.190179	0.464928	Ssc.53714	AY285927.1	MHC class II SLA-DQ alpha chain mRNA (haplotype c)
Ssc.12911.1.A1_a_at	0.00218709	1.65357	-0.3967	0.241439	0.0293679	0.32439	Ssc.48979	CF795801	MRNA, clone:ITT010090H07, expressed in intestine
Ssc.11048.1.S1_at	0.0189713	1.15722	-0.907097	0.239099	-0.091466	0.42083	Ssc.56474	BI404223	MRNA, clone:LNG010066H03, expressed in lung
Ssc.290.1.S1_at	0.0401124	1.29341	-0.774834	0.238449	-0.090258	0.383242	Ssc.290	NM_214078.1	selectin P (granule membrane protein 140kDa, antigen CD62)
Ssc.8594.1.A1_at	0.000282991	1.78431	-0.297804	0.236168	0.0742029	0.305637	Ssc.8594	CO941957	MRNA, clone:ITT010090B11, expressed in intestine
Ssc.10434.1.S1_at	0.000648441	1.10099	-1.00731	0.231921	0.0644166	0.487484	Ssc.10434	CF367863	Frizzled 8 precursor (Frizzled-8) (Fz-8) (mFz8)
Ssc.23797.1.S1_at	0.000622904	1.76735	-0.362481	0.228485	0.138474	0.32334	Ssc.23797	NM_213779.1	putative MIP-1beta protein
Ssc.6222.1.S1_a_at	0.019877	1.96006	-0.186701	0.225818	-0.172231	0.228095	Ssc.27786	NM_213774.1	CD74 antigen
Ssc.10993.1.S1_a_at	0.0026055	1.50878	-0.661766	0.222126	-0.204025	0.305066	Ssc.50185	NM_213932.1	urate transporter/channel protein, isoform (UATp,i)
Ssc.44.1.S1_at	0.00228434	1.60451	-0.572272	0.221168	-0.0970275	0.307458	Ssc.44	NM_214002.1	glycoprotein GPIIIa
Ssc.19694.1.S1_at	0.0144221	1.78054	-0.410481	0.218997	0.329819	0.365839	Ssc.19694	BX671405	Glutathione peroxidase 3
Ssc.2873.1.S1_at	0.000486148	1.93225	-0.275127	0.216528	0.0489176	0.271058	Ssc.51927	CN166698	PDZK1 interacting protein 1
Ssc.90.1.S1_at	0.029787	1.56724	-0.649232	0.215167	0.187579	0.38431	Ssc.90	NM_001001540.1	38 kDa heparin-binding glycoprotein
Ssc.957.1.S1_at	0.000974904	1.51108	-0.716803	0.213471	0.17774	0.396847	Ssc.20728	CN153484	C1-INH mRNA for C1 inhibitor
Ssc.10805.1.A1_at	0.00483886	1.74126	-0.488268	0.213228	-0.140414	0.271369	Ssc.59484	BF703232	MRNA, clone:OVRM10121C02, expressed in ovary
Ssc.3012.1.S1_at	2.50227e-05	1.34879	-0.909236	0.209057	0.104515	0.422119	Ssc.43938	CN166439	MRNA, clone:THY010082G01, expressed in thymus
Ssc.16648.1.S1_at	0.0110259	1.98871	-0.275858	0.208112	-0.163675	0.224941	Ssc.16648	CK458095	Thioredoxin interacting protein
Ssc.21162.1.S1_s_at	0.000239006	1.82842	-0.46844	0.203505	0.0926522	0.300248	Ssc.25739	CF789161	interferon regulatory factor 7
Ssc.9522.1.A1_at	0.00228319	2.15755	-0.146117	0.202547	-1.04168	0.108877	Ssc.9522	BF710766	ring finger 144B (RNF144B), mRNA >gb|BC142
Ssc.9372.1.A1_at	0.00583686	1.56011	-0.750323	0.2016	-0.316593	0.272306	Ssc.9372	CN163067	molecule possessing ankyrin repeats induced by lipopolysaccharide (MAIL), homolog of mouse
Ssc.19067.1.A1_at	0.00358822	1.92961	-0.388656	0.200509	0.0943837	0.280248	Ssc.19067	CF368753	Surface glycoprotein, Ig superfamily member, transcript variant 4 (CDON), mRNA
Ssc.26009.1.S1_at	0.00132789	1.96144	-0.391612	0.195732	0.0944688	0.274149	Ssc.26009	BX926326	Sus scrofa mRNA, clone:OVR010031B11, expressed in ovar
Ssc.15885.1.S1_at	0.00323371	2.0107	-0.390371	0.189323	-0.240537	0.210043	Ssc.15885	NM_213804.1	RNA helicase
Ssc.30887.1.S1_at	0.00268849	2.29584	-0.106023	0.18922	-0.634721	0.131164	Ssc.45486	CB471554	MRNA, clone:AMP010074G10, expressed in alveolar macrophage
Ssc.21582.1.S1_at	0.0258161	1.80012	-0.613085	0.187739	-0.341435	0.226636	Ssc.21582	CO954945	MRNA, clone:ITT010051H04, expressed in intestine
Ssc.23981.1.A1_at	0.000216276	1.67634	-0.786502	0.181389	0.0274361	0.318882	Ssc.23981	CK452079	UDP-N-acetyl-alpha-D-galactosamine:polypeptide N-acetylgalactosaminyltransferase 12 (GalNAc-T12)
Ssc.13128.1.A1_at	0.00157155	2.2626	-0.207755	0.180447	-0.764967	0.122634	Ssc.13128	BQ604431	C28H8.3
Ssc.61.1.S1_at	0.0418813	2.16721	-0.368168	0.172494	0.173187	0.251037	Ssc.61	NM_214009.1	complement component 3
Ssc.6172.1.S1_at	0.00127057	2.15728	-0.427515	0.166686	-0.476546	0.161117	Ssc.49848	BX666421	MRNA, clone:LVR010104B10, expressed in liver
Ssc.22075.1.S1_at	0.00344144	2.3924	-0.254259	0.15969	-0.0745735	0.18087	Ssc.22075	BP156384	selectin L (lymphocyte adhesion molecule 1) (SELL)
Ssc.6384.1.S1_at	0.0207855	1.89481	-0.757396	0.159076	-0.479548	0.192862	Ssc.56308	BQ601472	cDNA DKFZp459M187 (from clone DKFZp459M187)
Ssc.26005.1.S1_at	0.000930633	2.01456	-0.656157	0.157048	0.103113	0.265826	Ssc.51257	BX926252	Pig DNA sequence from clone PigE-122C21 on chromosome 17, complete sequence
Ssc.27727.1.S1_at	0.00146337	2.02739	-0.667951	0.154391	-0.172241	0.217693	Ssc.18510	BG895597	MRNA, clone:AMP010044G02, expressed in alveolar macrophage
Ssc.22075.2.A1_at	0.0177584	1.99577	-0.719906	0.15223	-0.363279	0.194919	Ssc.22075	CF360243	selectin L (lymphocyte adhesion molecule 1) (SELL)
Ssc.5204.1.S1_at	0.000405447	2.50739	-0.291783	0.143669	-0.12868	0.160865	Ssc.5204	CK463412	Clone rnco1933b_j2.y1.abd, mRNA sequence
Ssc.29006.1.S1_at	0.000103706	2.3633	-0.498725	0.137545	0.0904968	0.206928	Ssc.42778	AY687281.1	interferon beta
Ssc.10359.1.S1_at	0.000681057	2.66506	-0.28933	0.129015	-0.116079	0.145477	Ssc.10359	CN032939	calcium binding protein P22 isoform 2
Ssc.24529.1.S1_at	0.0264407	2.24113	-0.729196	0.127598	0.681303	0.339193	Ssc.24529	CK459359	gamma C
Ssc.18948.1.S1_at	1.82775e-05	2.1718	-0.809267	0.126651	0.178839	0.251222	Ssc.18948	CB475095	Serum amyloid A2
Ssc.286.1.S1_s_at	0.0038301	2.34129	-0.652919	0.125503	0.115724	0.213815	Ssc.286	NM_213817.1	inflammatory response protein 6
Ssc.222.1.S1_at	0.000813395	1.76108	-1.23947	0.124952	0.106148	0.317554	Ssc.222	AY285933.1	MHC class II (SLA-DR-alpha)
Ssc.864.1.S1_at	0.00446762	2.61892	-0.414077	0.122173	-0.568421	0.109777	Ssc.864	NM_214281.1	fumarate hydratase
Ssc.31073.1.S1_at	0.00111342	1.80895	-1.23179	0.12152	0.11149	0.308328	Ssc.42454	BX674608	Homo sapiens peptidase inhibitor 15 (PI15)
Ssc.19389.1.A1_at	0.00040794	1.55788	-1.5819	0.113458	0.20211	0.390727	Ssc.19389	CF359935	Normal mucosa of esophagus-specific gene 1 protein isoform 1
Ssc.3835.1.S1_at	0.000233449	1.34708	-1.82612	0.110859	0.109766	0.424161	Ssc.54817	NM_001001637.1	alpha-actinin-2-associated LIM protein
Ssc.719.1.S1_a_at	0.0125909	3.14313	-0.0480622	0.109485	-0.44639	0.0830706	Ssc.719	NM_213876.1	alveolar macrophage-derived chemotactic factor-II
Ssc.22075.3.A1_at	0.00279245	2.85008	-0.366364	0.107586	-0.0456891	0.134365	Ssc.22075	CF793314	selectin L (lymphocyte adhesion molecule 1) (SELL)
Ssc.1177.1.S1_at	0.00134996	2.24035	-1.03836	0.103041	-0.27197	0.175274	Ssc.1177	AY349426.1	complement component 1, s subcomponent
Ssc.4222.1.S1_at	0.0364202	2.42007	-0.894077	0.100541	1.04177	0.384672	Ssc.54403	BX919174	Transferrin
Ssc.719.1.S1_at	0.00888645	3.472	0.122632	0.0981161	-0.383386	0.0690898	Ssc.719	NM_213876.1	alveolar macrophage-derived chemotactic factor-II
Ssc.10884.1.A1_at	0.00221085	2.29787	-1.07177	0.0967469	-0.124945	0.186492	Ssc.56942	BF713431	MRNA, clone:THY010006D10, expressed in thymus
Ssc.983.1.S1_at	0.000916697	2.49091	-0.946602	0.092301	-0.244195	0.150194	Ssc.9951	CO952050	Complement component 1, r subcomponent
Ssc.19106.1.S1_at	0.000254437	1.56988	-1.96801	0.086097	0.427739	0.453086	Ssc.19106	BG834200	sulfatase 2 isoform a precursor
Ssc.19481.1.S1_at	1.01054e-05	1.53627	-2.00432	0.0859363	0.129786	0.37723	Ssc.19481	CN163379	domain binding protein 1; pp21 homolog
Ssc.62.2.S1_a_at	0.000206913	3.32122	-0.321283	0.0800753	-0.224717	0.0856186	Ssc.62	AF493992.1	interleukin 6 (interferon, beta 2)
Ssc.9957.1.A1_at	0.00235676	3.23078	-0.540861	0.0732191	-0.1052	0.099031	Ssc.9957	BI399438	Small inducible cytokine A7 precursor (CCL7) (Monocyte chemotactic protein 3) (MCP-3)
Ssc.5464.1.A1_at	0.000255606	1.89872	-1.96031	0.0689154	0.315447	0.333724	Ssc.5464	CD571929	Carboxypeptidase E
Ssc.12776.1.A1_at	0.00320723	2.9821	-1.09647	0.0591875	0.0696554	0.132821	Ssc.22075	BI403590	clone:PBL010003A09, expressed in periphral blood mononuclear cell
Ssc.16297.1.S2_at	0.00513644	3.08901	-1.28692	0.0481628	-0.0430601	0.114065	Ssc.16297	NM_214268.1	selectin E (endothelial adhesion molecule 1)
Ssc.31124.1.S1_at	0.0152886	2.997	-1.52598	0.0434959	-0.123412	0.114991	Ssc.59185	CO946528	UMC-p6mm3-007-d12 6mm ovarian follicle p6mm Sus scrofa cDNA 3'
Ssc.382.1.S1_at	0.00183738	3.96607	-0.644364	0.0409375	-0.356105	0.0499915	Ssc.382	U61139.1	colony stimulating factor 2 (granulocyte-macrophage)
Ssc.15886.1.S1_at	0.000680572	0.286523	0.0146489	0.828243	-1.50674	0.288518	Ssc.15886	NM_214131.1	caspase 3, apoptosis-related cysteine peptidase
									183
downregulated in P4 but UP-REGULATED IN Reg
Ssc.13849.1.S1_at	0.00521226	0.405743	-1.09565	0.353213	1.50864	2.14786	Ssc.13849	BI399153	cathepsin C isoform 2
Ssc.26292.1.S1_at	0.00975947	0.601485	-0.793073	0.380361	2.8149	4.63772	Ssc.26292	BX917516	histone family, member A
Ssc.30125.1.A1_at	0.000230936	0.415967	-1.31997	0.300215	1.60677	2.2828	Ssc.40162	CO941849	UMC-peov3-010-e04 Oviduct from a gilt in estrus peov Sus scrofa cDNA 3', mRNA sequence
Ssc.4141.1.A1_at	0.0390854	-0.393797	-1.99194	0.330302	1.18476	2.98672	Ssc.4141	CO950111	Equus caballus similar to MKP-1 like protein tyrosine phosphatase (LOC100057681), mRNA
Ssc.1191.1.S1_at	0.00045383	0.115152	-1.57798	0.309254	2.33359	4.6539	Ssc.58922	CN160909	MARC 4PIG Sus scrofa cDNA 3', mRNA sequence
Ssc.8767.1.A1_at	0.000238027	0.277351	-1.63914	0.264897	1.70309	2.68652	Ssc.8767	CK463313	ARC 4PIG Sus scrofa cDNA 5', mRNA sequence
Ssc.19035.1.S1_at	0.000986901	0.391242	-1.64738	0.243396	1.49298	2.14614	Ssc.19035	CF368162	Pan troglodytes chondroitin beta1,4 N-acetylgalactosaminyltransferase, transcript variant 11
Ssc.9035.1.A1_at	5.21359e-05	0.186567	-1.66703	0.276701	1.24528	2.08308	Ssc.9035	BQ602007	Homo sapiens clone IMAGE:111290 mRNA sequence
Ssc.16570.1.S1_at	0.000834977	0.197007	-1.64042	0.27982	1.47526	2.42546	Ssc.18510	CN160866	clone RP44-363K13, complete sequence
Ssc.208.1.S1_at	0.0145547	0.0710959	-1.03713	0.463866	1.73586	3.17062	Ssc.208	NM_214412.1	cytochrome P450 1A1
Ssc.22406.1.A1_at	0.00419512	0.796561	-1.04831	0.27838	1.81971	2.03235	Ssc.27596	CF792401	Aquaporin 1
Ssc.6080.1.S1_at	0.00170554	0.215405	-1.42636	0.320463	1.39536	2.26569	Ssc.6080	NM_213870.1	antileukoproteinase
Ssc.14475.3.S1_a_at	0.0204402	0.215261	-0.69179	0.533274	1.46348	2.37548	Ssc.14475	AB097926.1	peroxisome proliferator-activated receptor gamma
Differential changes in P4 OR Reg
Probe Set ID	p-value	[P1](normalized)	[P4](normalized)	Fold change [P4]	[Reg](normalized)	Fold change [Reg]	Gene Title
Downregulated in both P4 and Reg
Ssc.21872.1.S1_at	1.38767e-06	1.73414	-0.0923691	0.281947	0.00533327	0.301702	small trans-membrane and glycosylated protein
Ssc.382.1.S1_at	0.00183738	3.96607	-0.644364	0.0409375	-0.356105	0.0499915	colony stimulating factor 2 (granulocyte-macrophage)
Ssc.719.1.S1_at	0.00888645	3.472	0.122632	0.0981161	-0.383386	0.0690898	alveolar macrophage-derived chemotactic factor-II
Ssc.719.1.S1_a_at	0.0125909	3.14313	-0.0480622	0.109485	-0.44639	0.0830706	alveolar macrophage-derived chemotactic factor-II
Ssc.62.2.S1_a_at	0.000206913	3.32122	-0.321283	0.0800753	-0.224717	0.0856186	interleukin 6 (interferon, beta 2)
Ssc.9957.1.A1_at	0.00235676	3.23078	-0.540861	0.0732191	-0.1052	0.099031	Monocyte chemoattractant protein 3
Ssc.864.1.S1_at	0.00446762	2.61892	-0.414077	0.122173	-0.568421	0.109777	fumarate hydratase
Ssc.16297.1.S2_at	0.00513644	3.08901	-1.28692	0.0481628	-0.0430601	0.114065	selectin E (endothelial adhesion molecule 1)
Ssc.13128.1.A1_at	0.00157155	2.2626	-0.207755	0.180447	-0.764967	0.122634	C28H8.3
Ssc.21.1.S1_s_at	0.00656262	1.74066	-0.110206	0.277227	-1.21089	0.129269	RNA helicase
Ssc.6433.2.S1_at	0.00409672	0.526913	0.168106	0.779809	-2.38612	0.132767	zinc finger, NFX1-type containing 1 isoform 1
Ssc.24282.1.S1_at	0.0010679	1.78334	-0.0611122	0.278462	-1.12217	0.133461	Chemokine (C-X-C motif) ligand 2
Ssc.10359.1.S1_at	0.000681057	2.66506	-0.28933	0.129015	-0.116079	0.145477	calcium binding protein P22 isoform 2
Ssc.983.1.S1_at	0.000916697	2.49091	-0.946602	0.092301	-0.244195	0.150194	Complement component 1, r subcomponent
Ssc.3706.1.S1_at	0.000560583	1.75843	0.115205	0.320141	-0.897993	0.158613	Superoxide dismutase 2, mitochondrial
Ssc.314.1.S1_at	0.000100863	0.499249	0.0163715	0.715549	-2.1286	0.161785	adrenomedullin
Ssc.336.1.S1_at	0.00559949	1.37553	-0.182176	0.33969	-1.19835	0.167952	ubiquitin-specific protease
Ssc.1177.1.S1_at	0.00134996	2.24035	-1.03836	0.103041	-0.27197	0.175274	complement component 1, s subcomponent
Ssc.29006.1.S1_at	0.000103706	2.3633	-0.498725	0.137545	0.0904968	0.206928	interferon beta
Ssc.15885.1.S1_at	0.00323371	2.0107	-0.390371	0.189323	-0.240537	0.210043	RNA helicase
Ssc.286.1.S1_s_at	0.0038301	2.34129	-0.652919	0.125503	0.115724	0.213815	inflammatory response protein 6
Ssc.16648.1.S1_at	0.0110259	1.98871	-0.275858	0.208112	-0.163675	0.224941	Thioredoxin interacting protein
Ssc.12842.1.S2_at	3.29969e-05	0.408541	0.0519037	0.780983	-1.73327	0.226596	caveolin 1
Ssc.6222.1.S1_a_at	0.019877	1.96006	-0.186701	0.225818	-0.172231	0.228095	CD74 antigen
Ssc.26189.1.S1_a_at	0.0211566	1.10519	-0.135959	0.423034	-0.938795	0.242492	transporter protein 4
Ssc.113.1.S1_at	0.0255778	1.29589	-0.0154638	0.402943	-0.723553	0.246654	interleukin 1, alpha
Ssc.61.1.S1_at	0.0418813	2.16721	-0.368168	0.172494	0.173187	0.251037	complement component 3
Ssc.18948.1.S1_at	1.82775e-05	2.1718	-0.809267	0.126651	0.178839	0.251222	Serum amyloid A2
Ssc.11074.1.S1_at	0.00206642	1.39336	0.116376	0.412656	-0.583451	0.25405	Complement factor D
Ssc.13226.1.A1_at	0.00171378	1.5523	-0.143992	0.308577	-0.386249	0.260878	B aggressive lymphoma gene isoform 2
Ssc.12758.1.A1_at	6.59625e-05	1.50569	-0.0284939	0.345275	-0.431803	0.26107	Proteasome beta 9 subunit
Ssc.2873.1.S1_at	0.000486148	1.93225	-0.275127	0.216528	0.0489176	0.271058	PDZK1 interacting protein 1
Ssc.11073.1.S1_at	0.00788584	1.24757	-0.0340166	0.411344	-0.618918	0.274241	proteasome subunit LMP7
Ssc.221.1.S1_at	0.00298615	1.34281	-0.255872	0.330178	-0.476259	0.283403	myxovirus (influenza virus) resistance 1, interferon-inducible protein p78
SscAffx.1.1.S1_at	0.00137533	1.75824	-0.188286	0.25944	-0.0419466	0.287137	interferon stimulated exonuclease gene 20kDa
Ssc.15886.1.S1_at	0.000680572	0.286523	0.0146489	0.828243	-1.50674	0.288518	caspase 3, apoptosis-related cysteine peptidase
Ssc.6191.1.S1_at	0.000475456	1.44404	-0.100938	0.342701	-0.344295	0.289506	deltex 3-like isoform 3
Ssc.16151.1.S1_at	0.00573396	1.82271	-0.169448	0.251363	0.0390975	0.290455	granulocyte colony-stimulating factor
Ssc.28465.1.S1_at	0.00234934	1.65385	-0.247007	0.267784	-0.125719	0.29127	phosphoglucomutase 5
Ssc.7155.1.A1_at	0.0040165	0.52383	0.216604	0.808194	-1.23068	0.296374	NECD
Ssc.21162.1.S1_s_at	0.000239006	1.82842	-0.46844	0.203505	0.0926522	0.300248	interferon regulatory factor 7
Ssc.29301.1.A1_at	5.54742e-06	1.46339	-0.0553293	0.348997	-0.271447	0.300444	hypothetical protein
Ssc.29002.1.A1_at	0.00449551	0.394756	-0.100261	0.709553	-1.33641	0.301208	guanylate cyclase 1, soluble, beta 3
Ssc.10993.1.S1_a_at	0.0026055	1.50878	-0.661766	0.222126	-0.204025	0.305066	urate transporter/channel protein, isoform (UATp,i)
Ssc.44.1.S1_at	0.00228434	1.60451	-0.572272	0.221168	-0.0970275	0.307458	glycoprotein GPIIIa
Ssc.3706.1.S2_at	0.00429124	1.27977	-0.0742311	0.391205	-0.418511	0.308152	Superoxide dismutase 2, mitochondrial
Ssc.4759.1.S1_at	0.000521602	1.31154	-0.0344131	0.393394	-0.361849	0.313516	Nuclear factor of kappa light polypeptide gene enhancer in B-cells inhibitor, alpha
Ssc.222.1.S1_at	0.000813395	1.76108	-1.23947	0.124952	0.106148	0.317554	MHC class II (SLA-DR-alpha)
Ssc.23981.1.A1_at	0.000216276	1.67634	-0.786502	0.181389	0.0274361	0.318882	UDP-N-acetyl-alpha-D-galactosamine:polypeptide N-acetylgalactosaminyltransferase 12 (GalNAc-T12)
Ssc.6353.2.S1_at	0.00464485	0.55418	-0.0105903	0.676063	-1.08594	0.32083	Chromosome 17 clone pkmCon73, mRNA sequence
Ssc.220.1.A1_at	0.000869537	1.4575	-0.0797104	0.344551	-0.181588	0.32106	myxovirus (influenza virus) resistance 2 (mouse)
Ssc.1579.1.S1_at	0.000838159	0.249859	-0.0442288	0.815588	-1.38899	0.321114	equilibrative nucleoside transporter 1
Ssc.23797.1.S1_at	0.000622904	1.76735	-0.362481	0.228485	0.138474	0.32334	putative MIP-1beta protein
Ssc.19494.1.S1_at	3.05321e-05	1.41464	-0.00908065	0.37275	-0.203578	0.325738	interferon regulatory factor 1
Ssc.5464.1.A1_at	0.000255606	1.89872	-1.96031	0.0689154	0.315447	0.333724	Carboxypeptidase E
Ssc.21987.2.S1_at	0.00593987	0.323741	0.102385	0.857758	-1.24506	0.337087	interferon-related developmental regulator 1
Ssc.8947.1.S1_at	0.00197305	1.23147	0.0363524	0.436752	-0.331119	0.338544	basic helix-loop-helix domain containing, class B, 2
Ssc.24529.1.S1_at	0.0264407	2.24113	-0.729196	0.127598	0.681303	0.339193	gamma C
Ssc.17353.1.S1_at	0.0408338	1.14059	-0.298821	0.368718	-0.412234	0.340843	serine, 7 (enterokinase) isoform 2
Ssc.13068.1.A1_at	4.46311e-05	1.492	-0.108265	0.329817	-0.0518799	0.342963	poly (ADP-ribose) polymerase family, member 15
Ssc.3139.1.A1_at	0.000357179	1.38331	-0.0707662	0.364988	-0.157853	0.343608	Regulator of G-protein signalling 2, 24kDa
Ssc.12286.1.A1_at	0.0185367	1.39723	-0.100055	0.35422	-0.105865	0.352797	leukemia protein
Ssc.23834.1.S1_at	0.000135786	1.50216	-0.100713	0.32922	0.00454021	0.354137	sushi domain containing 3
Ssc.235.2.S2_at	0.00263215	0.415019	-0.0686168	0.715173	-1.03622	0.365708	calpastatin
Ssc.19694.1.S1_at	0.0144221	1.78054	-0.410481	0.218997	0.329819	0.365839	Glutathione peroxidase 3
Ssc.13777.1.S1_at	0.000442124	1.26183	-0.167327	0.371348	-0.162053	0.372708	SLA-DM alpha chain
Ssc.11557.1.A1_at	0.00333037	1.29619	-0.358741	0.317553	-0.111341	0.376956	interferon, alpha-inducible protein (clone IFI-15K)
Ssc.19481.1.S1_at	1.01054e-05	1.53627	-2.00432	0.0859363	0.129786	0.37723	domain binding protein 1; pp21 homolog
Ssc.290.1.S1_at	0.0401124	1.29341	-0.774834	0.238449	-0.090258	0.383242	selectin P (granule membrane protein 140kDa, antigen CD62)
Ssc.90.1.S1_at	0.029787	1.56724	-0.649232	0.215167	0.187579	0.38431	38 kDa heparin-binding glycoprotein
Ssc.4222.1.S1_at	0.0364202	2.42007	-0.894077	0.100541	1.04177	0.384672	Transferrin
Ssc.4227.1.S1_at	0.0112603	1.09264	0.18868	0.534419	-0.265586	0.390063	Claudin-5 protein
Ssc.19389.1.A1_at	0.00040794	1.55788	-1.5819	0.113458	0.20211	0.390727	Normal mucosa of esophagus-specific gene 1 protein isoform 1
Ssc.113.1.S2_at	0.0347389	1.18108	-0.43282	0.326715	-0.160138	0.394688	interleukin 1, alpha
Ssc.957.1.S1_at	0.000974904	1.51108	-0.716803	0.213471	0.17774	0.396847	C1-INH mRNA for C1 inhibitor
Ssc.28517.1.S1_at	7.40028e-05	1.27413	-0.0964833	0.386726	-0.0289183	0.405269	dual specificity phosphatase 10 isoform 4
Ssc.26300.2.S1_at	0.000518832	1.20507	-0.454911	0.316443	-0.0713585	0.412816	unc-93 homolog B1 isoform 3
Ssc.3517.1.S1_at	0.010526	1.21007	-0.0628377	0.413824	-0.0613505	0.414251	phospholipid transfer protein
Ssc.3835.1.S1_at	0.000233449	1.34708	-1.82612	0.110859	0.109766	0.424161	alpha-actinin-2-associated LIM protein
Ssc.11779.1.S1_at	0.0125496	1.18517	-0.333256	0.349067	-0.00569661	0.43804	secreted folate binding protein
Ssc.12966.1.S1_at	0.00345173	1.24566	-0.657304	0.267394	0.0791451	0.445497	LIM domain only 2 (rhombotin-like 1) isoform 1
Ssc.19106.1.S1_at	0.000254437	1.56988	-1.96801	0.086097	0.427739	0.453086	sulfatase 2 isoform a precursor
Ssc.6433.1.S1_at	6.99997e-05	1.14751	-0.165517	0.402475	0.00629934	0.453379	zinc finger, NFX1-type containing 1 isoform 1
Ssc.3921.1.S1_at	0.000497973	1.14981	-0.223714	0.385946	0.0307649	0.460397	endothelial PAS domain protein 1
Ssc.19095.1.A1_at	0.0112121	1.04378	-0.315052	0.389897	-0.0672528	0.462961	neuropilin- and tolloid-like protein 1 isoform 3 precursor
Ssc.11102.1.S1_at	0.0153073	1.2951	-0.729022	0.245855	0.190179	0.464928	MHC class II SLA-DQ alpha chain mRNA (haplotype c)
Ssc.1013.1.A1_at	0.0108977	1.0813	-0.203044	0.410557	-0.00585334	0.470689	microsomal glutathione S-transferase 1
Ssc.15973.1.S1_at	0.0313676	1.04919	-0.15409	0.434287	-0.0174687	0.477424	ATP-diphosphohydrolase
Ssc.12286.2.A1_at	4.62668e-06	1.10605	-0.320864	0.371925	0.065787	0.486238	leukemia protein
Ssc.10434.1.S1_at	0.000648441	1.10099	-1.00731	0.231921	0.0644166	0.487484	Frizzled 8 precursor (Frizzled-8) (Fz-8) (mFz8)
Ssc.5982.1.A1_at	0.00187287	1.00732	-0.480342	0.35659	0.0129417	0.501952	interferon consensus sequence binding protein 1
Ssc.19907.1.S1_at	7.24679e-05	1.30663	-2.85398	0.0559154	0.390469	0.529918	tissue factor
Ssc.22067.1.A1_at	0.0176265	1.02472	-0.209702	0.425012	0.119521	0.533958	carrier family 16, member 8
Ssc.18278.2.A1_at	0.00214611	1.04265	-0.338111	0.384017	0.155553	0.540702	nebulin-related anchoring protein
Ssc.20525.1.S1_at	0.0040942	1.15374	-1.27108	0.186232	0.267865	0.541159	Insulin-like growth factor 2 (somatomedin A)
Ssc.19648.1.S1_at	0.00383559	1.01452	-0.57746	0.331715	0.162908	0.554164	solute carrier family 15, member 3
Ssc.22030.1.S1_at	0.0121245	1.02707	-0.958919	0.25244	0.200534	0.563883	RANTES protein
Ssc.7158.1.A1_a_at	0.0242741	1.24785	-0.858641	0.232211	0.458322	0.578534	calpain, small subunit 1
Ssc.11063.1.S1_at	0.00350843	0.8702	-1.28291	0.224828	0.5521	0.802126	SLA-DQ beta1 domain
Downregulated in P4 but not change or upregulated in Reg
Ssc.2197.1.S1_at	0.00794597	0.397915	-1.06896	0.361764	0.26862	0.914278	transmembrane protein 45A isoform 1
Ssc.24652.1.S1_at	0.0450525	0.20704	-1.05227	0.417745	0.139197	0.954063	activated protein kinase kinase kinase kinase 1
Ssc.4479.1.S1_at	0.00040474	0.449988	-1.70088	0.225177	0.419838	0.979318	peptide, CUB domain, EGF-like 1
Ssc.20559.1.A1_at	0.0042365	0.186111	-1.39789	0.333555	0.159312	0.981596	CD59 molecule, complement regulatory protein
Ssc.5713.1.S1_at	0.0010716	0.323607	-1.32228	0.319551	0.356473	1.02304	gelatinase A
Ssc.18715.1.A1_at	0.00156965	0.314654	-1.03788	0.391604	0.381525	1.04744	Cbp/p300-interacting transactivator, with Glu/Asp-rich carboxy-terminal domain, 4
Ssc.11079.1.A1_at	0.00197637	0.400188	-2.01011	0.188117	0.517438	1.08467	ribonuclease, RNase A family, 4
Ssc.5127.1.S1_at	0.0394926	0.507133	-1.00095	0.351578	0.904063	1.3167	fructose 1,6-bisphosphatase
Ssc.4538.1.S1_at	7.1874e-05	0.121613	-1.18592	0.404011	0.521186	1.31912	protein LOC704537
Ssc.5105.2.S1_a_at	0.000857728	0.124816	-1.07114	0.436496	0.628983	1.4183	G protein-coupled receptor
Ssc.21194.1.S1_at	0.00140509	0.322894	-1.35462	0.312621	0.850642	1.44168	protein tyrosine phosphatase, non-receptor type 7 isoform 2 isoform 3
Ssc.1600.3.S1_at	6.1955e-06	0.175567	-1.95925	0.227697	0.75139	1.49053	family with sequence similarity 80, member A
Ssc.47.1.S1_at	0.00716889	0.449593	-1.33197	0.290869	1.11413	1.58506	insulin-like growth factor binding protein 2
Ssc.29031.1.A1_at	0.00827765	0.454054	-0.939412	0.380649	1.3355	1.84222	histone family, member B
Ssc.22406.1.A1_at	0.00419512	0.796561	-1.04831	0.27838	1.81971	2.03235	Aquaporin 1
Ssc.13849.1.S1_at	0.00521226	0.405743	-1.09565	0.353213	1.50864	2.14786	cathepsin C isoform 2
Ssc.6510.1.A1_at	0.000392765	0.133831	-0.0706612	0.867844	1.24856	2.16554	(Embryonic vascular EGF repeat-containing protein) (EVEC)
Ssc.6080.1.S1_at	0.00170554	0.215405	-1.42636	0.320463	1.39536	2.26569	antileukoproteinase
Ssc.30125.1.A1_at	0.000230936	0.415967	-1.31997	0.300215	1.60677	2.2828	hypothetical protein
Ssc.15397.1.S1_at	0.0117283	0.0281762	-0.269438	0.813597	1.25108	2.33417	LIM and cysteine-rich domains 1
Ssc.14475.3.S1_a_at	0.0204402	0.215261	-0.69179	0.533274	1.46348	2.37548	peroxisome proliferator-activated receptor gamma
Ssc.208.1.S1_at	0.0145547	0.0710959	-1.03713	0.463866	1.73586	3.17062	cytochrome P450 1A1
Ssc.18898.1.A1_s_at	0.000137356	0.415127	-0.34193	0.591702	2.70253	4.88177	G protein-coupled receptor 65
Upregulated in both P4 and Reg
Ssc.18011.1.S1_at	0.0245978	-0.438452	1.29669	3.32913	-0.257447	1.13367	popeye protein 2 isoform 2
Ssc.16259.1.S1_at	0.00212013	-0.447042	1.17863	3.08586	-0.251589	1.14508	guanine nucleotide binding protein (G protein), alpha inhibiting activity polypeptide 1
Ssc.26795.1.S1_at	0.0177983	-0.266574	1.08623	2.55409	-0.066539	1.14873	Heterogeneous nuclear ribonucleoprotein C-like 1 (hnRNP core protein C-like 1) isoform 2
Ssc.10636.1.A1_at	0.0252173	-0.644708	1.04004	3.21484	-0.326486	1.24679	hypothetical protein
Ssc.1508.1.A1_at	0.00049052	-0.592505	1.54591	4.40277	-0.238814	1.27783	tyrosine phosphatase, receptor type, D isoform 5 precursor
Ssc.16259.1.A1_at	0.00375701	-0.570029	1.36983	3.83667	-0.126125	1.36028	guanine nucleotide binding protein (G protein), alpha inhibiting activity polypeptide 1
Ssc.12191.1.A1_at	0.0312107	-0.945664	1.11135	4.16123	-0.5015	1.36053	90-kDa heat shock protein
Ssc.11302.1.S2_at	0.00162155	-1.05173	2.41866	11.0838	-0.602646	1.36517	collagen, type III, alpha 1
Ssc.10386.1.S1_at	0.00538319	-0.842777	1.12995	3.9251	-0.316201	1.44051	lysyl oxidase preproprotein isoform 1
Ssc.1271.3.S1_at	0.0008267	-0.810867	1.16238	3.92651	-0.236904	1.48861	PNAS-4 protein
Ssc.28093.1.A1_at	0.0105632	-0.749899	1.08676	3.57182	-0.0343372	1.64212	protein regulator of cytokinesis 1 isoform 2
Ssc.9896.2.A1_at	1.46864e-05	-0.973885	1.2681	4.73047	-0.0849492	1.85181	ST8 alpha-N-acetyl-neuraminide alpha-2,8-sialyltransferase 4
Ssc.5604.1.S1_at	0.000143337	-0.526883	0.000252008	1.44106	0.398651	1.89939	Protein S
Ssc.10168.1.A1_at	0.000655582	-1.13086	0.604998	3.33077	-0.0756226	2.07805	kelch-like 17
Ssc.18084.1.S1_at	0.0178953	-1.0233	0.475523	2.82612	0.106826	2.18878	J domain containing protein 1 isoform a isoform 2
Ssc.15750.1.S1_a_at	0.00178546	-1.41133	0.449466	3.63208	-0.261172	2.21938	p14ARF protein
Ssc.18811.1.A1_at	0.00122253	-1.07221	0.12473	2.29253	0.173827	2.3719	Gap junction protein, alpha 4, 37kDa
Ssc.26617.1.A1_at	0.000912636	-1.3083	0.540197	3.60125	-0.049404	2.39313	paired mesoderm homeobox 1 isoform pmx-1b isoform 3
Ssc.9101.1.A1_at	0.00248475	-1.30073	0.497706	3.47843	-0.0388613	2.39806	tyrosine phosphatase, receptor type, D isoform 5 precursor
Ssc.2444.2.A1_a_at	0.00137527	-0.350245	0.104005	1.37007	1.0281	2.59969	laminin alpha 3 subunit isoform 1 isoform 3
Ssc.26290.1.S1_at	0.000398826	-0.284724	-0.0526879	1.17449	1.09512	2.6024	integrin, beta 5 isoform 3
Ssc.18808.1.S1_at	0.0152427	-1.28788	-0.0112036	2.4228	0.147082	2.70375	progestin and adipoQ receptor family member VI isoform 2
Ssc.10608.2.A1_at	0.000394602	-0.417516	-0.128246	1.22202	1.15011	2.96416	cytoplasmic polyadenylation element binding protein 2 isoform A
Ssc.120.1.S1_at	0.0352974	-0.447716	-0.173934	1.20897	1.18847	3.10844	endoglin
Ssc.27241.1.S1_at	0.000316202	-1.14505	0.0479431	2.28626	0.514414	3.15899	synaptic Ras GTPase activating protein 1
Ssc.4368.1.S1_at	0.00805517	-0.478139	-0.15679	1.2495	1.21822	3.24082	FBXO 32
Ssc.24477.1.A1_at	0.0205335	-1.14213	-0.0847977	2.08108	0.629942	3.41545	Rho-associated, coiled-coil containing protein kinase 2
Ssc.30048.1.A1_at	0.0440529	-0.749083	0.102406	1.80436	1.06203	3.50912	solute carrier family 4 member 11
Ssc.16584.1.A1_at	0.00074757	-0.43501	-0.0335102	1.32088	1.40914	3.59042	AE binding protein 1
Ssc.11487.1.A1_at	0.0328941	-0.671479	0.016645	1.61119	1.19588	3.64864	RIKEN cDNA E130201N16
Ssc.1936.1.A1_at	0.00367476	-0.578093	-0.163055	1.33333	1.34337	3.78807	family 5A, member 1
Ssc.639.1.A1_at	0.00011257	-1.19077	-0.0456274	2.21168	0.815985	4.01877	GTP binding protein overexpressed in skeletal muscle
Ssc.24731.1.A1_at	0.00098033	-1.54192	-0.0219859	2.86777	0.598773	4.40973	ring finger and KH domain containing 2
Ssc.9896.1.A1_at	0.000103678	-2.26373	0.802959	8.3785	-0.0553683	4.62151	alpha-N-acetyl-neuraminide alpha-2,8-sialyltransferase 4
Ssc.18938.1.A1_at	0.000545617	-1.00306	0.0273051	2.04254	1.21234	4.64408	carboxypeptidase E
Ssc.30026.1.A1_at	2.13605e-05	-0.323848	-0.141338	1.13486	1.91525	4.72103	ATP-binding cassette, sub-family A , member 5 isoform 3
Ssc.19520.1.A1_at	0.00158569	-2.07936	0.226312	4.94398	0.387537	5.52854	Somatostatin
Ssc.13645.1.A1_at	0.0167498	-2.83897	2.7544	48.2806	-0.290577	5.84982	secretogranin II
Ssc.10942.1.S1_at	0.00303208	-0.781929	0.214829	1.99551	2.04123	7.07712	enolase 3 (beta, muscle)
Ssc.17324.1.A1_at	0.00752676	-2.5956	-0.133731	5.50928	0.237112	7.1241	eukaryotic translation elongation factor 1 alpha 1 isoform 8
Ssc.13047.1.A1_at	5.87106e-05	-0.630862	-0.0441325	1.50184	2.41592	8.26366	Melanophilin
Ssc.26224.1.S1_at	0.000975306	-0.643679	-0.450948	1.14293	2.81076	10.962	Chromosome 17 clone pkmCon46, mRNA sequence
Ssc.2819.1.S1_at	0.00431885	-1.9788	0.249756	4.68663	1.95015	15.2311	calsarcin 1
Up regulated in P4 but not changed or down regulated in Reg
Ssc.1504.2.S1_at	0.00372547	0.0287352	0.209795	1.13372	-1.02163	0.482847	cassette, sub-family F (GCN20), member 1
Ssc.21468.2.A1_at	0.000704801	0.045018	0.404008	1.28253	-2.06514	0.231621	La ribonucleoprotein domain family member 2 isoform 1
Ssc.16001.1.S1_at	0.0104353	-0.254884	0.435384	1.61358	-2.32118	0.238772	Ubiquitin-activating enzyme E1
Ssc.16026.1.A1_at	0.000362033	-0.180398	0.736717	1.88834	-2.11838	0.260981	exportin 1
Ssc.14470.1.S1_at	0.00207648	-0.52621	1.1086	3.10546	-2.3922	0.274334	moesin
Ssc.15401.1.S1_at	0.00886872	0.0167139	1.63744	3.07529	-1.81662	0.280615	T-box 10
Ssc.75.2.S1_a_at	0.0214223	-0.148344	0.530692	1.60107	-1.8941	0.298177	cadherin 5
Ssc.5319.1.S1_at	0.000377848	-0.253042	0.6569	1.87897	-1.96315	0.305637	hypothetical protein LOC733658
Ssc.11661.2.S1_at	0.000359692	-0.272709	0.869063	2.20652	-1.92594	0.317926	protein phosphatase 1 catalytic subunit gamma isoform
Ssc.16210.1.S1_at	0.000141233	-0.256486	1.03898	2.45456	-1.85073	0.331196	polypyrimidine tract-binding protein
Ssc.16348.1.S1_at	0.021394	0.26345	0.524396	1.19826	-1.30743	0.336604	Neuropeptide Y receptor Y1
Ssc.25029.1.A1_at	0.0240612	0.0867569	0.821552	1.66416	-1.42847	0.34984	EGF, latrophilin and seven transmembrane domain containing 1
Ssc.28632.3.A1_at	0.0014146	-0.302456	0.816991	2.17264	-1.7823	0.358528	O-acyltransferase (membrane bound) domain containing 1
Ssc.8747.2.S1_at	0.000502273	-0.305025	0.657857	1.9492	-1.77541	0.360885	protein LOC540032
Ssc.25276.2.S1_at	0.00223324	-0.634396	1.95422	6.0152	-2.09093	0.364366	LAG1 longevity assurance homolog 2 isoform 1
Ssc.10256.1.A1_at	0.00335911	0.12713	0.37985	1.19145	-1.30043	0.371759	phosphodiesterase 4B, cAMP-specific isoform 1 isoform 3
Ssc.15219.1.S1_at	0.000407345	-0.117969	0.861528	1.97178	-1.5446	0.371999	selenophosphate synthetase 2
Ssc.28632.1.S1_at	0.00155498	-0.553814	1.6817	4.70931	-1.97361	0.373766	O-acyltransferase (membrane bound) domain containing 1
Ssc.14467.2.S1_a_at	0.00108564	-0.631622	0.97994	3.05583	-2.04345	0.375836	amphiregulin (schwannoma-derived growth factor)
Ssc.11165.2.S1_at	0.0061053	-0.294429	1.2736	2.96498	-1.67832	0.383184	SEC31-like 1 isoform 1 isoform 6
Ssc.22107.1.A1_at	0.00042699	-0.402772	0.554729	1.94194	-1.77781	0.385544	Eukaryotic translation initiation factor 4E
Ssc.15824.1.S1_at	0.00114792	-0.108623	0.465669	1.48895	-1.47459	0.387975	Karyopherin alpha 2
Ssc.26446.2.S1_a_at	0.000202015	-0.105397	0.423704	1.44303	-1.46346	0.390106	methionyl aminopeptidase 1
Ssc.9918.1.A1_at	0.00411371	-0.23805	1.34042	2.98652	-1.58627	0.392775	HIV-1 Rev binding protein isoform 2
Ssc.24988.1.S1_at	0.00992546	-0.244036	0.830035	2.10537	-1.58542	0.394641	succinate dehydrogenase complex, subunit A, flavoprotein (Fp)
Ssc.810.1.S2_at	0.0076629	-0.336849	1.53197	3.65233	-1.671	0.396625	Scavenger receptor class B member 2
Ssc.21730.1.S1_at	0.00771135	-0.146555	0.706031	1.80573	-1.4726	0.398859	lamin A/C
Ssc.11090.2.S1_at	0.013545	-0.162335	0.424663	1.50212	-1.48735	0.399144	copine family member IX
Ssc.18713.1.A1_at	0.00299699	-0.133676	0.270465	1.3233	-1.42849	0.407589	SMC5 protein
Ssc.25276.1.S1_at	0.00646811	-0.0396188	0.483251	1.43681	-1.3026	0.416681	LAG1 longevity assurance homolog 2 isoform 1
Ssc.21716.2.S1_at	0.00310619	-0.0636406	0.435707	1.41357	-1.30591	0.422706	protein phosphatase 1 catalytic subunit alpha isoform
Ssc.30748.1.S1_at	0.00155072	-0.109436	0.890061	1.9993	-1.3262	0.430247	kinesin family member 11
Ssc.15823.1.S1_at	0.0015999	-0.244036	1.06511	2.47795	-1.45592	0.431705	laminin, beta 1
Ssc.8417.1.A1_at	0.00764172	-0.13372	0.800384	1.9107	-1.33284	0.435542	apoptosis inhibitor 5 isoform 4
Ssc.11165.3.A1_at	0.00290273	-0.275219	0.930596	2.30668	-1.4718	0.436309	SEC31-like 1 isoform 1 isoform 6
Ssc.21242.2.S1_at	0.000597733	-0.16186	0.398917	1.47506	-1.34737	0.43967	beta catenin-like 1 isoform 3
Ssc.27728.1.S1_at	0.00111247	-0.351731	1.14047	2.81319	-1.52325	0.443955	zinc finger protein 313
Ssc.2860.3.S1_a_at	0.00137131	-0.0225533	0.429361	1.36785	-1.18741	0.446009	FAS-associated factor 1
Ssc.5549.1.S1_at	0.0116992	0.202656	1.32842	2.18218	-0.957053	0.447603	fatty acid binding protein 5
Ssc.24342.1.S1_at	0.00915008	-0.120629	0.806811	1.9019	-1.2759	0.448981	agrin
Ssc.9066.1.S1_a_at	0.0178193	-0.152326	0.521553	1.59536	-1.30625	0.449401	histone deacetylase 1
Ssc.24872.1.S1_at	0.00017498	-0.135012	1.06171	2.29218	-1.28403	0.450931	paraspeckle protein 1 isoform 1
Ssc.11809.1.S1_at	0.0119629	0.0616743	0.709267	1.56655	-1.07016	0.456335	leucine rich repeat containing 7 isoform 1
Ssc.31207.1.S1_at	0.00118812	-0.254351	0.64645	1.8671	-1.38267	0.45745	thymopoietin isoform 1
Ssc.23488.1.S1_at	0.0181218	-0.177661	0.894772	2.10298	-1.29996	0.459362	Glutathione reductase
Ssc.2395.1.A1_at	0.000147318	-0.0421556	0.394685	1.35364	-1.15571	0.462155	vacuolar protein sorting 26 homolog A isoform 1
AFFX-Ssc-ef1a-5_at	0.00446894	-0.209716	0.379887	1.50483	-1.32091	0.46291	polypeptide chain elongation factor 1alpha
Ssc.15912.1.S1_at	0.00188826	-0.546927	2.70632	9.53507	-1.65754	0.463097	connexin 43
Ssc.12566.1.A1_at	0.00251354	-0.143299	0.399875	1.45718	-1.24831	0.464898	general transcription factor IIIC, polypeptide 3, 102kDa isoform 3
Ssc.11935.1.A1_at	0.00641377	-0.382325	1.18563	2.96485	-1.47013	0.470478	WW domain-containing adapter with a coiled-coil region isoform 1
Ssc.12803.1.S1_at	0.000251865	-0.214913	1.12847	2.53745	-1.29744	0.472202	acyl-Coenzyme A oxidase 1, palmitoyl
Ssc.26704.1.S1_at	0.00239783	-0.0646075	0.509016	1.48826	-1.13042	0.477702	exonuclease 1 isoform b isoform 2
Ssc.11071.2.S1_a_at	0.0116182	-0.136965	1.24995	2.61519	-1.19328	0.480859	vinculin
Ssc.12972.1.S1_at	0.00971511	-0.052059	0.776806	1.77629	-1.10184	0.483042	N-acylsphingosine amidohydrolase-like protein isoform 2
AFFX-Ssc-actin-5_x_at	0.00297083	-0.322769	0.819292	2.20696	-1.37106	0.483541	actin, beta
Ssc.14341.1.A1_at	0.00922848	-0.129827	0.515502	1.5641	-1.17306	0.485238	falafel CG9351-PA, isoform A
Ssc.11403.1.S1_at	0.0136011	-0.306998	1.28741	3.01971	-1.33426	0.49064	Spectrin beta protein (pAZSP 5' end)
Ssc.6798.2.S1_at	0.00305161	-0.41299	1.28436	3.24304	-1.43219	0.493389	stress 70 protein chaperone, microsome-associated, 60kDa
Ssc.19271.3.S1_at	0.012553	-0.00356754	0.224903	1.17159	-1.02133	0.493883	GATA zinc finger domain containing 2B isoform 2
Ssc.26446.1.S1_at	0.00188572	-0.00765085	0.535043	1.45669	-1.01981	0.495803	methionyl aminopeptidase 1
Ssc.2155.1.S1_at	0.0474639	-0.114421	0.968873	2.11887	-1.12606	0.495984	DIRAS family, GTP-binding RAS-like 3
Ssc.25219.2.S1_at	0.00440592	-0.129656	0.366021	1.40998	-1.13926	0.496682	digestive-organ expansion factor
Ssc.29047.2.S1_at	0.00265563	-0.00773239	0.277894	1.21894	-1.00993	0.499239	hypoxia-inducible protein
Ssc.15917.1.S1_at	0.00671183	-0.155512	0.204004	1.283	-1.15065	0.501689	p53 protein
Ssc.4747.1.S1_at	0.000736691	-0.452686	1.69828	4.44124	-1.43031	0.507816	follistatin
Ssc.390.1.A1_at	0.010085	-0.667838	1.58753	4.77455	-1.64209	0.509004	hypoxia-inducible factor 1, alpha subunit (basic helix-loop-helix transcription factor)
Ssc.22095.2.A1_a_at	0.000584101	-0.0402404	0.285812	1.25358	-1.00081	0.513855	DNA directed RNA polymerase II polypeptide B
Ssc.5962.2.S1_a_at	0.00245701	-0.0869656	0.154222	1.18196	-1.04356	0.51527	methyl-CpG binding domain protein 2 isoform 1
Ssc.2695.1.S1_at	0.00199763	-0.117387	0.0870628	1.15225	-1.07067	0.516455	heterogeneous nuclear ribonucleoprotein A2/B1
Ssc.5549.2.S1_at	0.00956415	0.0804543	1.70795	3.08976	-0.872749	0.516484	Fatty acid binding protein 5
Ssc.4626.2.S1_at	0.00017181	-0.18876	1.29124	2.7895	-1.13448	0.519171	similar to RANBP4
Ssc.3180.2.S1_at	0.000448129	-0.192983	0.864789	2.08171	-1.13545	0.520344	tumor protein p53 binding protein, 1 isoform 4
Ssc.16341.1.S1_at	0.0137473	-0.319101	1.29315	3.05728	-1.25837	0.521497	Prostaglandin-endoperoxide synthase 1
Ssc.21447.1.S1_at	0.0066854	-0.627757	1.53941	4.49141	-1.5668	0.52158	glutaminyl-tRNA synthetase isoform 2
Ssc.13961.2.A1_at	0.00379904	-0.143516	0.872884	2.02286	-1.07927	0.52277	Eukaryotic translation elongation factor 1 alpha 1
Ssc.23976.1.S1_at	0.000458871	-0.202507	1.03759	2.36215	-1.13797	0.522875	NP_061135.1 (Asp-Glu-Ala-Asp) box polypeptide 43
Ssc.12636.1.A1_at	0.0211536	-0.124268	0.265214	1.30992	-1.05902	0.523134	inhibitor of kappa light polypeptide gene enhancer in B-cells, kinase complex-associated protein
Ssc.6276.2.S1_at	0.0208069	-0.0945136	0.320284	1.33311	-1.02086	0.52619	abhydrolase domain containing 6 isoform 1
Ssc.16085.1.S1_at	0.00233898	-0.515892	1.65002	4.48749	-1.44039	0.526864	tyrosine kinase 2
Ssc.6689.1.S1_at	0.00162216	-0.37791	1.32471	3.25492	-1.29744	0.52868	heterogeneous nuclear ribonucleoprotein R
Ssc.4363.2.S1_at	0.00191606	-0.25111	1.17889	2.69447	-1.15846	0.533163	serine/threonine protein phosphatase with EF-hand motifs 2 isoform a
Ssc.12300.3.A1_at	0.00353535	-0.275622	0.700171	1.96672	-1.18068	0.534013	Nuclear pore complex protein Nup133 (Nucleoporin Nup133) (133 kDa nucleoporin)
Ssc.11450.1.S1_at	0.000205693	-0.123721	0.348326	1.38708	-1.02416	0.535725	chloride intracellular channel 1
Ssc.1313.1.A1_at	0.00911202	-0.153732	0.122618	1.21113	-1.04528	0.539035	RS21-C6 protein
Ssc.19762.2.S1_at	0.0415733	-0.387609	0.431328	1.76411	-1.25616	0.547697	protein disulfide isomerase-associated 5
Ssc.24093.1.S1_at	0.0013873	-0.161956	0.854623	2.02312	-1.0298	0.547966	nardilysin (N-arginine dibasic convertase)
Ssc.11751.1.S1_at	0.00246881	-0.182699	0.606138	1.72768	-1.04852	0.548735	aldehyde dehydrogenase 1 family, member L1
Ssc.28124.1.A1_at	4.64326e-05	-0.0902305	1.41023	2.82933	-0.953481	0.549713	Aurora kinase A
Ssc.23863.1.S1_at	0.00137549	-0.230828	0.295613	1.44037	-1.08641	0.552644	L-aminoadipate-semialdehyde dehydrogenase-phosphopantetheinyl transferase (4-phosphopantetheinyl transferase)
Ssc.12300.1.A1_at	0.00293507	-0.282079	0.284239	1.48074	-1.12847	0.556172	Nuclear pore complex protein Nup133 (Nucleoporin Nup133) (133 kDa nucleoporin)
Ssc.30747.1.A1_at	0.00338153	-0.272484	0.940294	2.31783	-1.10168	0.562843	archain isoform 1
Ssc.414.1.A1_at	0.00186032	-0.233939	0.919121	2.22385	-1.06235	0.563149	son3 protein
Ssc.2921.3.S1_at	6.8203e-05	-0.248287	1.96904	4.65029	-1.06622	0.567254	uridine-cytidine kinase 2 isoform 1
Ssc.12889.1.A1_at	0.00207522	-0.229748	0.564279	1.73391	-1.04688	0.56757	GC-rich promoter binding protein 1-like 1 isoform 1
Ssc.414.1.S1_at	0.00621791	-0.377972	0.653657	2.04433	-1.16678	0.578823	son3 protein
Ssc.26899.1.A1_at	0.00416911	-0.185468	1.06138	2.37322	-0.960228	0.584486	hypothetical protein
Ssc.26757.1.A1_at	0.00216193	-0.313975	1.09521	2.65587	-1.06774	0.593055	anillin, actin binding protein (scraps homolog, Drosophila) isoform 1
Ssc.24438.1.A1_at	0.00568925	-0.303113	0.380727	1.60641	-1.05636	0.593269	two AAA domain containing protein
Ssc.23470.1.S1_at	0.00883925	-0.380845	0.114711	1.40986	-1.13131	0.594411	BCL2-associated X protein
Ssc.17245.1.S1_at	0.00613242	-0.293759	0.454756	1.68006	-1.00154	0.61226	interleukin 13 receptor, alpha 1
Ssc.22101.2.A1_at	0.00262608	-0.264672	1.12213	2.61498	-0.970135	0.613246	methylenetetrahydrofolate dehydrogenase (NADP+ dependent) 1-like
Ssc.1866.2.S1_at	0.000909363	-0.264071	1.17142	2.70474	-0.940313	0.625793	filamin-binding LIM protein-1 isoform a isoform 1
Ssc.11741.2.A1_at	0.00178652	-0.131909	1.05971	2.28409	-0.763286	0.64556	neuroplastin isoform b precursor
Ssc.2456.2.A1_at	0.00020475	-0.0459997	1.10891	2.2267	-0.664501	0.651347	Tyrosine 3-monooxygenase/tryptophan 5-monooxygenase activation protein, theta polypeptide
Ssc.7195.2.S1_at	0.00065655	-0.0675718	1.05356	2.17517	-0.655653	0.665227	budding uninhibited by benzimidazoles 1 homolog
Ssc.22040.2.S1_at	0.0106027	-0.531257	0.748463	2.42792	-1.07881	0.68418	leucine rich repeat (in FLII) interacting protein 2 isoform 1
Ssc.16403.1.S1_at	0.00356796	-0.553678	1.29059	3.5907	-1.08559	0.691638	CG9646-PA, partial
Ssc.19327.1.S1_at	0.00169043	-0.315108	1.82214	4.39922	-0.770971	0.729074	Histone H1.3-like protein
Ssc.4265.1.A1_a_at	0.000703664	-0.24868	1.07535	2.50364	-0.701685	0.73052	trinucleotide repeat containing 6B isoform 1
Ssc.2921.2.A1_at	1.634e-05	-0.146384	1.53209	3.20089	-0.574722	0.743117	uridine-cytidine kinase 2 isoform 1
Ssc.11382.1.S1_at	0.0156031	-0.674203	1.0718	3.35428	-1.088	0.750647	tumor differentially expressed 2-like
Ssc.5028.1.A1_at	0.0201011	-0.0212035	1.09666	2.17025	-0.419252	0.758884	cadherin 18, type 2 isoform 2
Ssc.22598.2.A1_a_at	0.00604363	-0.454557	1.03651	2.81097	-0.82572	0.773159	zinc finger protein 326 isoform 1 isoform 1
Ssc.10991.3.S1_at	0.000906296	-0.22484	1.05567	2.42925	-0.576304	0.783788	HLA-B associated transcript 5
Ssc.22101.1.S1_at	0.00208537	-0.403334	1.18907	3.01551	-0.710417	0.808274	methylenetetrahydrofolate dehydrogenase (NADP+ dependent) 1-like
Ssc.22049.1.S1_at	0.0179039	-0.199692	1.09542	2.45396	-0.47471	0.82644	quiescin Q6 isoform a
Ssc.7357.1.A1_at	8.83207e-05	-0.178209	1.20728	2.6126	-0.434824	0.83705	fat3
Ssc.15912.1.A1_at	0.0109482	-0.335005	1.96543	4.92607	-0.51652	0.881777	connexin 43
Ssc.14134.1.S1_at	9.07375e-05	-0.169729	1.86804	4.1061	-0.34189	0.887512	polypeptide N-acetylgalactosaminyltransferase 2
Ssc.6633.2.A1_at	0.000612727	-0.257534	1.06454	2.50026	-0.417101	0.895294	BAT2 isoform 13
Ssc.15956.1.S1_at	0.00705628	-0.200381	1.11138	2.48244	-0.349159	0.902014	FAT mRNA, partial sequence
Ssc.19292.2.A1_at	0.00101771	-0.182748	1.7003	3.68853	-0.324591	0.90636	(alpha-N-acetyl-neuraminyl-2,3-beta-galactosyl-1,3)-N-acetylgalactosaminide alpha-2,6-sialyltransferase 3
Ssc.13587.2.S1_at	0.00393097	-0.476707	1.56984	4.13117	-0.593589	0.922179	epithelial isoform a
Ssc.8739.2.S1_at	0.000532723	-0.231941	1.00322	2.35408	-0.328548	0.93523	Oryza sativa (japonica cultivar-group)
Ssc.18336.1.S1_at	0.00104018	-0.531558	1.33373	3.64339	-0.54105	0.993442	hypothetical protein
Ssc.92.1.A1_at	0.00256745	-0.726413	1.44089	4.49182	-0.689929	1.02561	transforming growth factor, beta 2
Ssc.15904.1.S1_at	0.00157162	-0.834486	2.6826	11.4485	-0.767832	1.04729	interleukin-7
Not changed in P4 but alterred in Reg
Ssc.23154.2.S1_at	2.40532e-05	0.190515	0.069468	0.91952	-1.0373	0.426963	antigen identified by monoclonal antibody Ki-67
Ssc.9719.1.S1_at	5.80857e-06	0.130349	0.0129495	0.921848	-1.32236	0.365335	Myosin-4 (Myosin heavy chain B) (MHC B) (Uncoordinated protein 54)
Ssc.26714.1.S1_at	0.000469863	0.204738	0.131426	0.950454	-1.52313	0.301897	hypothetical protein
Ssc.19976.1.S1_at	0.000554803	-0.0500464	-0.111196	0.9585	1.20653	2.38929	nerve growth factor, beta
Ssc.28988.1.S1_at	0.00661544	0.180476	0.153205	0.981275	-1.17126	0.391819	2',3'-cyclic nucleotide 3' phosphodiesterase
Ssc.17912.1.A1_s_at	1.94654e-05	-0.142581	-0.154027	0.992098	1.9618	4.30013	paired mesoderm homeobox 1 isoform pmx-1b isoform 3
Ssc.15302.1.S1_at	0.0270221	-0.327106	-0.324477	1.00182	1.28425	3.05539	Coagulation factor II
Ssc.265.1.S3_at	0.0316899	-0.0645532	-0.0618581	1.00187	1.20685	2.41397	leptin
Ssc.13925.1.S1_at	0.0135751	-0.227719	-0.188796	1.02735	1.05373	2.43082	Growth associated protein 43
Ssc.26845.1.S1_at	0.0105402	-0.461738	-0.403338	1.04131	1.07086	2.89306	distal-less homeobox 5
Ssc.13028.1.S1_at	0.00023599	-0.186157	-0.121201	1.04605	1.3117	2.82423	leucine-rich repeat LGI family, member 2
Ssc.7511.1.S1_at	0.00108524	0.00243791	0.0910972	1.06338	-1.17238	0.44294	bruno-like 6, RNA binding protein
Ssc.629.1.S1_at	0.00958095	-0.152794	-0.0634911	1.06386	2.46682	6.14585	brain natriuretic peptide
Ssc.29002.1.S1_at	0.00361041	0.164602	0.298884	1.09755	-1.19824	0.388816	guanylate cyclase 1, soluble, beta 3
Ssc.1089.1.S1_at	2.32903e-06	0.0391625	-0.41618	0.729337	3.60391	11.833	fatty acid binding protein 4, adipocyte
